# Supplementary material for: Formal dual C(sp2)–H cross-dehydrogenative C–O bond formation to construct highly functionalized diaryl ethers with O2
Source: Royal Society of Chemistry journal article supplement (doi:10.1039/d1qo01942b), 2022-01-01

## Supporting Information

### **Formal dual C(sp<sup>2</sup>)-H cross-dehydrogenative C-O bond formation to construct highly functionalized diaryl ether with O<sub>2</sub>**

Muhammad Adnan Bashir<sup>‡</sup>, Langyu Tang<sup>‡</sup>, Longjie Li, Huaibin Yu, Weijun Yao, Guojiao Wu<sup>\*</sup>, and Fangrui Zhong<sup>\*</sup>

Key laboratory of Material Chemistry for Energy Conversion and Storage, Ministry of Education, Hubei Key Laboratory of Bioinorganic Chemistry & Materia Medica, School of Chemistry and Chemical Engineering, Huazhong University of Science and Technology (HUST), Wuhan 430074.

\*Email: [gjuwu@hust.edu.cn](mailto:gjuwu@hust.edu.cn); [chemzfr@hust.edu.cn](mailto:chemzfr@hust.edu.cn)

## 1 General Information

Chemicals and solvents were purchased from commercial suppliers and used as received unless noted. All products were purified by flash chromatography on silica gel. The chemical yields referred are isolated products.  $^1\text{H}$  NMR and  $^{13}\text{C}$  NMR spectra were recorded on 400 MHz, 500MHz or 600 MHz Bruker spectrometers. Chemical shifts of  $^1\text{H}$  NMR were reported in part per million relatives to the  $\text{CDCl}_3$  residual peak ( $\delta$  7.26). Chemical shifts of  $^{13}\text{C}$  NMR were reported relative to  $\text{CDCl}_3$  ( $\delta$  77.16) or  $\text{DMSO-d}_6$  ( $\delta$  39.04). The used abbreviations are as follows: s (singlet), d (doublet), t (triplet), quart (quartet), quint (quintet), m (multiplet), br (broad). Multiplets which arise from accidental equality of coupling constants of magnetically non-equivalent protons are marked as virtual (*virt*). High resolution mass spectra (HRMS) data were measured on a ESI-microTOFII. Melting points were measured on a SGW® X-4B and are not corrected. Reactions were monitored by TLC analysis using silica gel 60 Å F-254 thin layer plates and compounds were visualized with a UV light at 254 nm or 365 nm. Further visualization was achieved by staining with iodine, or  $\text{KMnO}_4$  followed by heating on a hot plate. Flash column chromatography was performed on silica gel 60 Å, 10-40  $\mu\text{m}$ . The substrates were prepared according to literature methods.<sup>1-6</sup>

## 2 Representative procedures

Unless specified otherwise, a flame-dried, 25 mL round bottom flask, backfilled with  $\text{N}_2$ , equipped with a Teflon-coated stir bar and a rubber septum was charged with phenol **1** (0.45 mmol, 67.5 mg, 2.25 equiv.), **2** (0.2 mmol, 46.6 mg, 1 equiv.) and dry and degassed  $\text{CH}_2\text{Cl}_2$  (2 mL, 1.0 M in phenol). In a separate, flame-dried 5 mL microwave vial  $[\text{Cu}(\text{CH}_3\text{CN})_4](\text{PF}_6)$  (4 mol%, 6.7 mg) and *N,N'*-di-*tert*-butylethylenediamine (5 mol%, 5  $\mu\text{L}$ .) were dissolved in dry and degassed  $\text{CH}_2\text{Cl}_2$  (1.0 mL, 0.04 M) to afford a homogeneous solution. This solution was then added to the round bottom flask *via* syringe to afford a final volume of 3 mL. Under a constant pressure of  $\text{O}_2$  (1 atm), the reaction was vented 3 times for 10 s to remove  $\text{N}_2$  or air. The reaction mixture was then stirred at rt (20 °C) for 4 h, then  $\text{TsOH}$  (150 mol%, 58 mg) was added to reaction flask and allow to stir for unless the reaction completed. The reaction was quenched by the addition of  $\text{NaHCO}_3$  (20 mL, 10% by weight aqueous solution). The phases were then separated, and the aqueous phase was extracted with  $\text{CH}_2\text{Cl}_2$  (3 x 20 mL). The combined organic phase was evaporated. Purification of crude product was performed by column chromatography using hexane/EtOAc (gradient elution

from 100:1 to 100:5) as the eluents to afford **3** and **4**.

### 3 Analytical data of desired products

#### 2-((2-(Benzylamino)naphthalen-1-yl)oxy)-4-(tert-butyl)-5-(4-(tert-butyl)phenoxy)phenol 3a

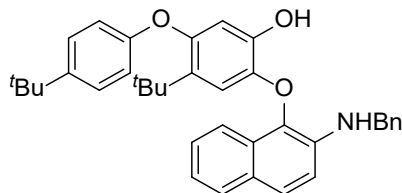

A pink solid, 101 mg, 92% yield.

**m.p.:** 162– 164 °C.

**TLC:**  $R_f = 0.58$  (Hexane/EtOAc = 10:1) [UV, KMnO<sub>4</sub>].

**<sup>1</sup>H NMR** (400 MHz, CDCl<sub>3</sub>)  $\delta$  7.77 (d,  $J = 8.1$  Hz, 1H), 7.70 – 7.64 (m, 2H), 7.44 – 7.32 (m, 7H), 7.32 – 7.28 (m, 1H), 7.26 (m, 1H), 7.14 (d,  $J = 8.9$  Hz, 1H), 6.94 (m, 2H), 6.61 (s, 1H), 6.53 (s, 1H), 4.56 (s, 2H), 1.36 (s, 9H), 1.20 (s, 9H).

**<sup>13</sup>C NMR** (101 MHz, CDCl<sub>3</sub>)  $\delta$  155.4, 151.2, 145.6, 143.6, 139.8, 139.4, 137.9, 132.8, 132.5, 128.8, 128.2, 128.1, 127.8, 127.4, 127.0, 126.9, 126.7, 126.6, 122.6, 119.7, 118.3, 114.5, 112.1, 108.0, 47.7, 34.4, 34.4, 31.7, 30.2.

**IR** (neat/cm<sup>-1</sup>) 3506.9, 3407.7, 1628.2, 1506.1, 1258.8, 1175.6, 865.6, 811.5.

**HRMS (ESI):** C<sub>37</sub>H<sub>40</sub>NO<sub>3</sub><sup>+</sup> [(M+H)<sup>+</sup>]: calcd.: 546.3003; found: 546.3000.

#### 2-((2-(benzylamino)naphthalen-1-yl)oxy)-4-iso-propyl-5-(4-iso-propylphenoxy)phenol 3b

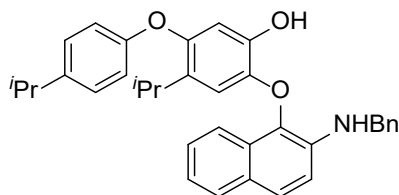

A brown oil, 91 mg, 81% yield.

**TLC:**  $R_f = 0.20$  (Hexane/EtOAc = 10:1) [UV, KMnO<sub>4</sub>].

**<sup>1</sup>H NMR** (600 MHz, CDCl<sub>3</sub>)  $\delta$  7.79 (d,  $J = 8.1$  Hz, 1H), 7.67 (dd,  $J = 8.7, 1.9$  Hz, 2H), 7.45 – 7.38 (m, 1H), 7.35 (d,  $J = 4.7$  Hz, 4H), 7.32 – 7.25 (m, 2H), 7.23 – 7.13 (m, 3H), 6.92 (d,  $J = 8.6$  Hz, 2H), 6.70 (s, 1H), 6.44 (s, 1H), 6.07 (s, 1H), 4.74 (s, 1H), 4.56 (s, 2H), 3.20 – 3.04 (m, 1H), 3.00 – 2.87 (m, 1H), 1.30 (d,  $J = 6.9$  Hz, 6H), 1.01 (d,  $J = 6.9$  Hz, 6H).

<sup>13</sup>C NMR (101 MHz, CDCl<sub>3</sub>) 13C NMR (101 MHz, CDCl<sub>3</sub>) δ 156.3, 148.8, 143.5, 142.9, 140.9, 139.3, 137.8, 132.3, 132.0, 128.7, 128.1, 128.0, 127.7, 127.4, 127.3, 126.9, 126.9, 126.6, 122.5, 119.6, 117.4, 114.5, 111.3, 107.7, 47.6, 33.4, 27.0, 24.2, 22.9.

IR (neat/cm<sup>-1</sup>) 2958.15, 1630.8, 1494.9, 1373.9, 1217.5, 1181.6, 1107.9, 875.5, 803.9.

HRMS (ESI): C<sub>35</sub>H<sub>36</sub>NO<sub>3</sub><sup>+</sup> [(M+H)<sup>+</sup>]: calcd.: 518.2690; found: 518.2698.

**2-((2-(Benzylamino)naphthalen-1-yl)oxy)-4-cyclohexyl-5-(4-cyclohexylphenoxy)phenol 3c**

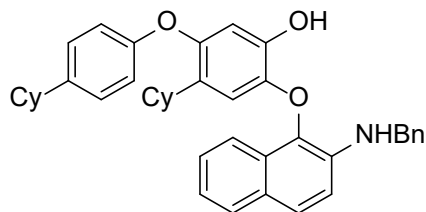

A dark brown oil, 97 mg, 79% yield.

TLC: R<sub>f</sub> = 0.48 (Hexane/EtOAc = 10:1) [UV, KMnO<sub>4</sub>].

<sup>1</sup>H NMR (600 MHz, CDCl<sub>3</sub>) δ 7.78 (d, *J* = 8.1 Hz, 1H), 7.70 – 7.64 (m, 2H), 7.40 (m, 1H), 7.37 – 7.25 (m, 6H), 7.22 – 7.12 (m, 3H), 6.92 (d, *J* = 8.6 Hz, 2H), 6.67 (s, 1H), 6.42 (s, 1H), 6.03 (s, 1H), 4.73 (s, 1H), 4.56 (s, 2H), 2.74 (tt, *J* = 12.1, 2.9 Hz, 1H), 2.60 – 2.43 (m, 1H), 1.98 – 1.87 (m, 4H), 1.85 – 1.75 (m, 2H), 1.73 – 1.56 (m, 4H), 1.53 – 1.35 (m, 4H), 1.35 – 1.18 (m, 3H), 1.17 – 0.98 (m, 3H).

<sup>13</sup>C NMR (101 MHz, CDCl<sub>3</sub>) δ 156.4, 149.3, 143.5, 142.4, 140.8, 139.5, 137.9, 132.3, 131.1, 128.8, 128.2, 128.1, 127.9, 127.7, 127.4, 127.0, 127.0, 126.7, 122.6, 119.6, 117.9, 114.5, 111.8, 107.5, 47.6, 44.0, 37.3, 34.8, 33.3, 27.1, 26.9, 26.3, 26.1.

IR (neat/cm<sup>-1</sup>) 3415.2, 2850.6, 1494.1, 1281.3, 1121.3, 10554.9, 735.3.

HRMS (ESI): C<sub>41</sub>H<sub>44</sub>NO<sub>3</sub><sup>+</sup> [(M+H)<sup>+</sup>]: calcd.: 598.3316; found: 598.3315.

**6-((2-(Benzylamino)naphthalen-1-yl)oxy)-2-methyl-3,4-bis(*o*-tolylxy)phenol 3d**

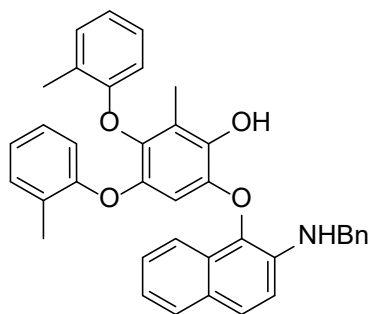

A brown solid, 95 mg, 84% yield.

**m.p.:** 80–82 °C.

**TLC:**  $R_f = 0.39$  (Hexane/EtOAc = 10:1) [UV, KMnO<sub>4</sub>].

**<sup>1</sup>H NMR** (600 MHz, CDCl<sub>3</sub>)  $\delta$  7.75 (d,  $J = 8.2$  Hz, 1H), 7.71 – 7.61 (m, 2H), 7.45 (m, 1H), 7.38 – 7.23 (m, 6H), 7.13 (d,  $J = 8.9$  Hz, 1H), 7.07 (d,  $J = 8.9$  Hz, 1H), 7.03 – 6.92 (m, 3H), 6.85 (m, 2H), 6.49 (m, 2H), 6.24 (s, 1H), 6.18 (brs, 1H), 4.71 (s, 1H), 4.54 (s, 2H), 2.30 (s, 3H), 1.82 (s, 3H), 1.63 (s, 3H).

**<sup>13</sup>C NMR** (101 MHz, CDCl<sub>3</sub>)  $\delta$  156.2, 156.1, 141.2, 140.6, 140.1, 139.9, 139.2, 137.9, 131.9, 131.0, 130.6, 130.6, 128.8, 128.1, 127.9, 127.7, 127.3, 127.1, 127.0, 126.9, 126.6, 126.4, 126.3, 122.6, 121.5, 121.3, 120.7, 119.3, 114.5, 113.5, 112.5, 105.8, 47.7, 15.4, 15.2, 9.5.

**HRMS (ESI):** C<sub>38</sub>H<sub>34</sub>NO<sub>4</sub><sup>+</sup> [(M+H)<sup>+</sup>]: calcd.: 568.2482; found: 568.2483.

**5,6-Bis([1,1'-biphenyl]-2-yloxy)-3-((2-(benzylamino)naphthalen-1-yl)oxy)-[1,1'-biphenyl]-2-ol 3e**

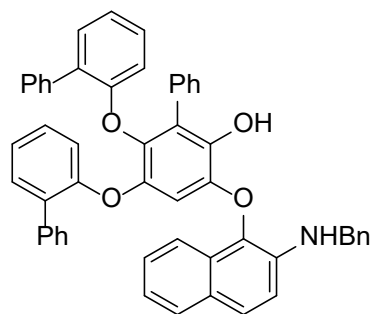

A white solid, 128 mg, 85% yield.

**m.p.:** 65– 67 °C.

**TLC:**  $R_f = 0.60$  (Hexane/EtOAc = 10:1) [UV, KMnO<sub>4</sub>].

**<sup>1</sup>H NMR** (600 MHz, CDCl<sub>3</sub>)  $\delta$  7.74 (d,  $J = 8.1$  Hz, 1H), 7.64 (m, 2H), 7.46 – 7.37 (m, 3H), 7.31 (m, 5H), 7.25 (m, 4H), 7.21 – 7.11 (m, 6H), 7.11 – 7.04 (m, 4H), 6.99 (m, 3H), 6.91 (m, 4H), 6.67 – 6.58 (m, 2H), 6.27 (s, 1H), 6.02 (s, 1H), 4.71 (s, 1H), 4.51 (s, 2H).

**<sup>13</sup>C NMR** (101 MHz, CDCl<sub>3</sub>)  $\delta$  154.9, 154.7, 142.2, 140.6, 140.1, 139.2, 138.9, 138.0, 137.9, 137.7, 132.1, 131.9, 131.0, 130.8, 130.5, 130.4, 129.5, 129.4, 128.9, 128.3, 128.2, 128.1, 127.9, 127.9, 127.7, 127.5, 127.5, 127.2, 127.2, 127.1, 126.7, 126.5, 124.7, 122.7, 122.3, 121.7, 119.3, 114.8, 114.5, 113.9, 107.8, 47.8.

**IR** (neat/cm<sup>-1</sup>) 3428.52, 3957.0, 1631.8, 117.8, 1202.3, 949.4, 752.6.

**HRMS (ESI):** C<sub>53</sub>H<sub>40</sub>NO<sub>4</sub><sup>+</sup> [(M+H)<sup>+</sup>]: calcd.: 754.2952; found: 754.2956.

**2-Benzyl-6-((2-(benzylamino)naphthalen-1-yl)oxy)-3,4-bis(2-benzylphenoxy)phenol 3f**

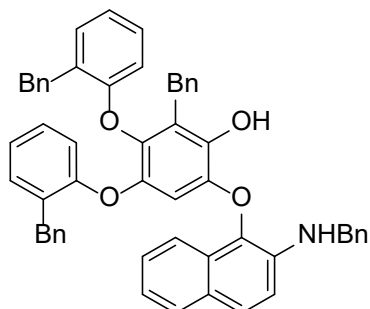

A brown solid, 128 mg, 80 % yield.

**m.p.:** 61–63 °C.

**TLC:** *R*<sub>f</sub> = 0.72 (Hexane/EtOAc = 10:1) [UV, KMnO<sub>4</sub>].

**<sup>1</sup>H NMR** (600 MHz, CDCl<sub>3</sub>) δ 7.76 (d, *J* = 8.1 Hz, 1H), 7.68 – 7.61 (m, 2H), 7.49 – 7.41 (m, 1H), 7.36 – 7.20 (m, 10H), 7.20 – 7.05 (m, 9H), 7.05 – 6.94 (m, 5H), 6.93 – 6.78 (m, 5H), 6.54 (dd, *J* = 8.2, 1.1 Hz, 1H), 6.49 (dd, *J* = 8.1, 1.2 Hz, 1H), 6.23 (s, 1H), 6.17 (s, 1H), 4.53 (s, 2H), 4.00 (s, 2H), 3.46 (s, 2H), 3.24 (s, 2H).

**<sup>13</sup>C NMR** (101 MHz, CDCl<sub>3</sub>) δ 155.7, 155.6, 141.7, 140.9, 140.6, 140.1, 140.1, 139.9, 139.7, 139.2, 137.9, 131.8, 130.2, 130.0, 129.9, 129.2, 129.1, 129.0, 128.8, 128.2, 128.2, 127.8, 127.7, 127.4, 127.1, 127.0, 127.0, 126.9, 125.9, 125.8, 125.7, 123.8, 122.6, 121.9, 121.7, 119.3, 114.5, 113.7, 113.2, 106.6, 47.6, 35.4, 34.6, 30.2.

**IR** (neat/cm<sup>-1</sup>) 3493.7, 2919.9, 1603.1, 1238.3, 1096.9, 998.7.

**HRMS (ESI):** C<sub>56</sub>H<sub>46</sub>NO<sub>4</sub><sup>+</sup> [(M+H)<sup>+</sup>]: calcd.: 796.3421; found: 796.3424.

**5-((2-(benzylamino)naphthalen-1-yl)oxy)-3,3-dimethyl-1-tosylindolin-6-ol 3g**

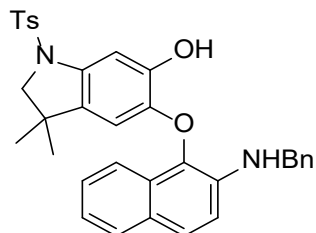

A white solid, 93 mg, 82% yield.

**m.p.:** 222–224 °C.

**TLC:**  $R_f = 0.34$  (Hexane/EtOAc = 3:1) [UV, KMnO<sub>4</sub>].

**<sup>1</sup>H NMR** (600 MHz, CDCl<sub>3</sub>)  $\delta$  7.75 (m, 3H), 7.63 (d,  $J = 8.9$  Hz, 1H), 7.57 (d,  $J = 8.5$  Hz, 1H), 7.46 (s, 1H), 7.43 – 7.34 (m, 2H), 7.27 (m, 7H), 7.10 (d,  $J = 9.0$  Hz, 1H), 6.12 (s, 1H), 6.07 (s, 1H), 4.65 (s, 1H), 4.51 (s, 2H), 3.56 (s, 2H), 2.39 (s, 3H), 0.91 (s, 6H).

**<sup>13</sup>C NMR** (101 MHz, DMSO)  $\delta$  146.2, 144.1, 142.9, 140.4, 138.1, 134.3, 133.3, 132.6, 130.7, 129.8, 128.2, 127.8, 127.8, 127.1, 126.7, 126.7, 126.6, 126.5, 126.3, 125.7, 121.6, 114.6, 108.4, 103.3, 63.5, 45.7, 39.4, 27.6, 20.9.

**IR** (neat/cm<sup>-1</sup>) 2920.0, 1723.2, 1603.3, 1490.0, 1318.5, 1158.9, 1046.6, 663.4, 575.2.

**HRMS (ESI):** C<sub>34</sub>H<sub>33</sub>N<sub>2</sub>OS<sup>+</sup> [(M+H)<sup>+</sup>]: calcd.: 565.2156; found: 565.2154.

**4-(tert-butyl)-5-(4-(tert-butyl)phenoxy)-2-((2-((4-methylbenzyl)amino)naphthalen-1-yl)oxy)phenol 3h**

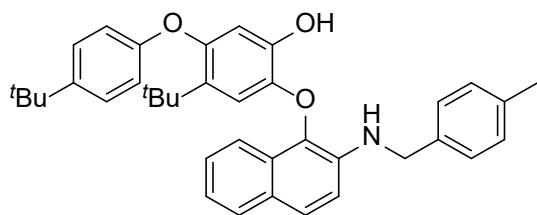

A brown solid, 104 mg, 93% yield.

**m.p.:** 80–82 °C.

**TLC:**  $R_f = 0.42$  (Hexane/EtOAc = 10:1) [UV, KMnO<sub>4</sub>].

**<sup>1</sup>H NMR** (600 MHz, CDCl<sub>3</sub>)  $\delta$  7.77 (d,  $J = 8.2$  Hz, 1H), 7.70 – 7.63 (m, 2H), 7.40 (m, 1H), 7.37 (m, 2H), 7.28 (m, 1H), 7.23 (d,  $J = 7.8$  Hz, 2H), 7.16 (m, 3H), 6.95 (d,  $J = 7.8$  Hz, 2H), 6.61 (s, 1H), 6.53 (s, 1H), 4.51 (s, 2H), 2.36 (s, 3H), 1.37 (s, 9H), 1.20 (s, 9H).

**<sup>13</sup>C NMR** (101 MHz, CDCl<sub>3</sub>)  $\delta$  155.4, 151.1, 145.5, 143.5, 139.7, 138.0, 136.9, 136.3, 132.8, 132.4, 129.4, 128.1, 128.0, 127.7, 127.0, 126.8, 126.6, 126.5, 122.4, 119.6, 118.2, 114.5, 112.0, 107.9, 47.5, 34.3, 34.3, 31.6, 30.1, 21.1.

**IR** (neat/cm<sup>-1</sup>) 2957.52, 1603.0, 1496.8, 1389.8, 1264.3, 1196.4, 800.6.

**HRMS (ESI):** C<sub>38</sub>H<sub>42</sub>NO<sub>3</sub><sup>+</sup> [(M+H)<sup>+</sup>]: calcd.: 560.3159; found: 560.3156.

**4-(tert-butyl)-5-(4-(tert-butyl)phenoxy)-2-((2-((4-ethylbenzyl)amino)naphthalen-1-yl)oxy)phenol 3i**

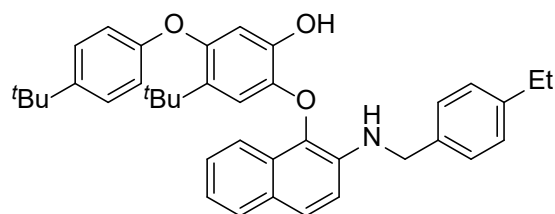

A brown oil, 102 mg, 89% yield.

**TLC:**  $R_f = 0.48$  (Hexane/EtOAc = 3:1) [UV,  $\text{KMnO}_4$ ].

**$^1\text{H NMR}$**  (600 MHz,  $\text{CDCl}_3$ )  $\delta$  7.77 (m, 1H), 7.67 (m, 2H), 7.45 – 7.32 (m, 3H), 7.31 – 7.24 (m, 3H), 7.22 – 7.15 (m, 3H), 6.95 (d,  $J = 8.9$  Hz, 2H), 6.61 (s, 1H), 6.54 (s, 1H), 5.97 (s, 1H), 4.67 (s, 1H), 4.52 (s, 2H), 2.70 – 2.64 (m, 2H), 1.36 (s, 9H), 1.26 (t,  $J = 7.6$  Hz, 3H), 1.21 (s, 9H).

**$^{13}\text{C NMR}$**  (101 MHz,  $\text{CDCl}_3$ )  $\delta$  155.4, 151.1, 145.5, 143.5, 143.3, 139.7, 138.1, 136.5, 132.8, 132.3, 128.2, 128.1, 128.0, 127.7, 127.1, 126.8, 126.6, 126.5, 122.4, 119.6, 118.2, 114.5, 112.0, 108.0, 47.5, 34.3, 34.3, 31.6, 30.1, 28.6, 15.7.

**IR** (neat/ $\text{cm}^{-1}$ ) 2959.5, 1630.7, 1390.2, 1263.4, 1196.1, 886.1, 802.0.

**HRMS (ESI):**  $\text{C}_{39}\text{H}_{44}\text{NO}_3^+$  [(M+H) $^+$ ]: calcd.: 574.3316; found: 574.3312.

**4-(tert-butyl)-5-(4-(tert-butyl)phenoxy)-2-((2-((4-methoxybenzyl)amino)naphthalen-1-yl)oxy)phenol 3j**

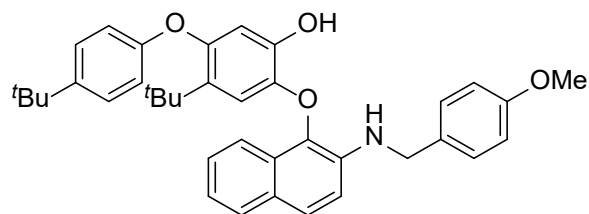

A dark brown solid, 106 mg, 91% yield.

**m.p.:** 70–72 °C.

**TLC:**  $R_f = 0.56$  (Hexane/EtOAc = 10:1) [UV,  $\text{KMnO}_4$ ].

**$^1\text{H NMR}$**  (600 MHz,  $\text{CDCl}_3$ )  $\delta$  7.77 (d,  $J = 8.2$  Hz, 1H), 7.67 (m, 2H), 7.40 (m, 1H), 7.39 – 7.34 (m, 2H), 7.28 – 7.22 (m, 3H), 7.18 (d,  $J = 8.9$  Hz, 1H), 6.94 (d,  $J = 8.9$  Hz, 2H), 6.87 (d,  $J = 8.1$  Hz, 2H), 6.60 (s, 1H), 6.52 (s, 1H), 4.48 (s, 2H), 3.81 (s, 3H), 1.36 (s, 9H), 1.19 (s, 9H).

**$^{13}\text{C NMR}$**  (101 MHz,  $\text{CDCl}_3$ )  $\delta$  158.9, 155.4, 151.1, 145.5, 143.5, 139.7, 138.0, 132.7, 132.4, 131.3, 128.2, 128.1, 128.0, 127.7, 126.8, 126.5, 126.5, 122.4, 119.6, 118.2, 114.5, 114.1, 112.0, 107.9, 55.3, 47.2, 34.3, 34.3, 31.5, 30.1.

**IR** (neat/ $\text{cm}^{-1}$ ) 2920.0, 1603.4, 1497.7, 1318.2, 1223.3, 1196.8, 885.9.



**HRMS (ESI):** C<sub>38</sub>H<sub>42</sub>NO<sub>4</sub><sup>+</sup> [(M+H)<sup>+</sup>]: calcd.: 576.3108; found: 576.3110.

**2-((2-((1,1'-biphenyl)-4-ylmethyl)amino)naphthalen-1-yl)oxy)-4-(tert-butyl)-5-(4-(tert-butyl)phenoxy)phenol 3k**

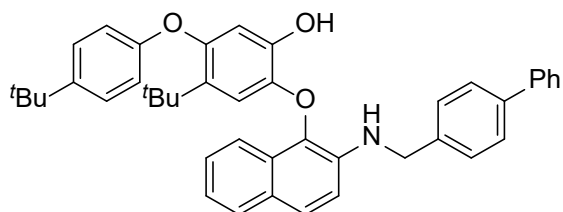

A brown solid, 112 mg, 90% yield.

**m.p.:** 90–92 °C.

**TLC:** *R<sub>f</sub>* = 0.13 (Hexane/EtOAc = 10:1) [UV, KMnO<sub>4</sub>].

**<sup>1</sup>H NMR** (600 MHz, CDCl<sub>3</sub>) δ 7.79 (d, *J* = 8.1 Hz, 1H), 7.70 (m, 2H), 7.64 – 7.54 (m, 4H), 7.50 – 7.46 (m, 2H), 7.44 – 7.36 (m, 6H), 7.34 – 7.27 (m, 1H), 7.21 (d, *J* = 8.9 Hz, 1H), 7.02 – 6.94 (m, 2H), 6.66 (s, 1H), 6.57 (s, 1H), 4.59 (s, 2H), 1.37 (s, 9H), 1.23 (s, 9H).

**<sup>13</sup>C NMR** (101 MHz, CDCl<sub>3</sub>) δ 155.4, 151.2, 145.5, 143.6, 140.8, 140.3, 139.7, 138.3, 137.7, 132.8, 132.6, 128.8, 128.2, 128.0, 127.8, 127.5, 127.3, 127.1, 126.9, 126.6, 126.5, 122.6, 119.7, 118.3, 114.5, 112.0, 108.0, 47.5, 34.3, 34.3, 31.6, 30.2.

**IR** (neat/cm<sup>-1</sup>) 2956.8, 1629.9, 1497.3, 1390.1, 1195.9, 885.9, 803.2.

**HRMS (ESI):** C<sub>43</sub>H<sub>44</sub>NO<sub>3</sub><sup>+</sup> [(M+H)<sup>+</sup>]: calcd.: 622.3316; found: 622.3313.

**2-((2-((4-Bromobenzyl)amino)naphthalen-1-yl)oxy)-4-(tert-butyl)-5-(4-(tert-butyl)phenoxy)phenol 3l**

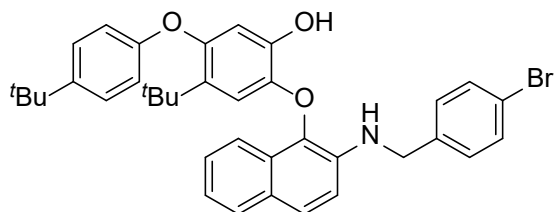

A dark brown solid, 110 mg, 88% yield.

**m.p.:** 71–73 °C.

**TLC:** *R<sub>f</sub>* = 0.67 (Hexane/EtOAc = 5:1) [UV, KMnO<sub>4</sub>].

**<sup>1</sup>H NMR** (400 MHz, CDCl<sub>3</sub>) δ 7.75 (d, *J* = 8.2 Hz, 1H), 7.68 – 7.59 (m, 2H), 7.46 – 7.41 (m, 2H), 7.40 – 7.36 (m, 1H), 7.35 – 7.32 (m, 2H), 7.28 – 7.24 (m, 1H), 7.20 – 7.16 (m, 2H), 7.06 – 7.02 (m, 1H), 6.94 – 6.89 (m, 2H), 6.58 (s, 1H), 6.47 (s, 1H), 4.48 (s, 2H), 1.33 (s, 9H), 1.16 (s, 9H).

**<sup>13</sup>C NMR** (101 MHz, CDCl<sub>3</sub>) δ 155.3, 151.2, 145.6, 143.5, 139.6, 138.5, 137.5, 132.8, 132.5, 131.8, 128.6, 128.1, 128.0, 127.8, 126.9, 126.6, 126.5, 122.6, 121.0, 119.6, 118.2, 114.2, 111.9, 107.9, 47.1, 34.3, 34.3, 31.6, 30.1.

**IR** (neat/cm<sup>-1</sup>) 3415.4, 2922.9, 1629.5, 1495.9, 1216.7, 1107.7, 802.5.

**HRMS (ESI):** C<sub>37</sub>H<sub>39</sub><sup>79</sup>BrNO<sub>3</sub><sup>+</sup> [(M+H)<sup>+</sup>]: calcd.: 624.2108; found: 624.2106.

**4-(tert-butyl)-5-(4-(tert-butyl)phenoxy)-2-((2-((4-fluorobenzyl)amino)naphthalen-1-yl)oxy)phenol 3m**

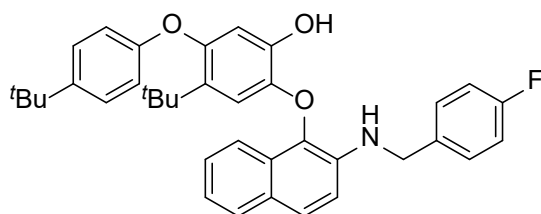

A white solid, 93 mg, 82% yield.

**m.p.:** 144– 146 °C.

**TLC:** *R*<sub>f</sub> = 0.57 (Hexane/EtOAc = 10:1) [UV, KMnO<sub>4</sub>].

**<sup>1</sup>H NMR** (600 MHz, CDCl<sub>3</sub>) 7.78 (d, *J* = 8.1 Hz, 1H), 7.71 – 7.60 (m, 2H), 7.46 – 7.35 (m, 3H), 7.29 (m, 3H), 7.11 (d, *J* = 9.0 Hz, 1H), 7.08 – 7.00 (m, 2H), 6.95 (d, *J* = 8.9 Hz, 2H), 6.63 (s, 1H), 6.52 (s, 1H), 4.69 (s, 1H), 4.51 (s, 2H), 1.37 (s, 9H), 1.21 (s, 9H).

**<sup>13</sup>C NMR** (101 MHz, CDCl<sub>3</sub>) δ 162.1 (d, *J* = 245.3 Hz), 155.3, 151.2, 145.6, 143.5, 139.6, 137.6, 135.0 (d, *J* = 3.1 Hz), 132.8, 132.5, 128.5 (d, *J* = 8.1 Hz), 128.1, 128.0, 127.8, 126.9, 126.6, 126.5, 122.6, 119.6, 118.3, 115.6 (d, *J* = 21.4 Hz), 114.3, 111.9, 107.9, 47.0, 34.3, 34.3, 31.6, 30.1.

**<sup>19</sup>F NMR** (376 MHz, CDCl<sub>3</sub>) δ -115.39.

**IR** (neat/cm<sup>-1</sup>) 3405.6, 2960.7, 1602.4, 1392.14, 1258.7, 1223.2, 823.6, 447.1.

**HRMS (ESI):** C<sub>37</sub>H<sub>39</sub>FNO<sub>3</sub><sup>+</sup> [(M+H)<sup>+</sup>]: calcd.: 564.2908; found: 564.2905.

**2-((2-((2-Bromobenzyl)amino)naphthalen-1-yl)oxy)-4-(tert-butyl)-5-(4-(tert-butyl)phenoxy)phenol 3n**

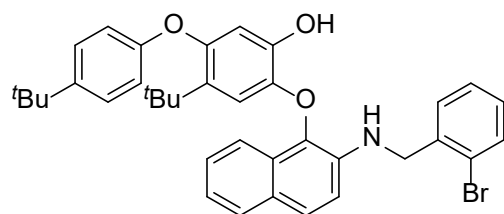

A brown solid, 107 mg, 88% yield.

**m.p.:** 130–132 °C.

**TLC:**  $R_f = 0.65$  (Hexane/EtOAc = 3:1) [UV, KMnO<sub>4</sub>].

**<sup>1</sup>H NMR** (500 MHz, CDCl<sub>3</sub>)  $\delta$  7.76 (d,  $J = 8.1$  Hz, 1H), 7.68 – 7.63 (m, 2H), 7.60 – 7.56 (m, 1H), 7.41 – 7.32 (m, 4H), 7.28 – 7.20 (m, 2H), 7.16 – 7.10 (m, 1H), 7.05 (d,  $J = 8.9$  Hz, 1H), 6.98 – 6.92 (m, 2H), 6.63 (s, 1H), 6.50 (s, 1H), 4.56 (s, 2H), 1.36 (s, 9H), 1.19 (s, 9H).

**<sup>13</sup>C NMR** (101 MHz, CDCl<sub>3</sub>)  $\delta$  155.4, 151.2, 145.5, 143.6, 140.8, 140.3, 139.7, 138.3, 137.7, 132.8, 128.8, 128.2, 128.0, 127.8, 127.5, 127.3, 127.1, 126.9, 126.6, 126.5, 122.6, 119.7, 118.3, 114.5, 112.0, 108.0, 47.5, 34.3, 34.3, 31.6, 30.2.

**IR** (neat/cm<sup>-1</sup>) 3512.45, 2960.1, 1603.1, 1495.9, 1372.1, 1176.1, 776.7, 548.3.

**HRMS (ESI):** C<sub>37</sub>H<sub>39</sub><sup>79</sup>BrNO<sub>3</sub><sup>+</sup> [(M+H)<sup>+</sup>]: calcd.: 624.2108; found: 624.2105.

**4-(tert-butyl)-5-(4-(tert-butyl)phenoxy)-2-((2-(3,4-dichlorobenzyl)amino)naphthalen-1-yl)oxyphenol 3o**

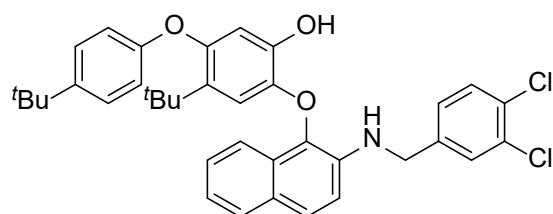

A brown solid, 96 mg, 78 % yield.

**m.p.:** 42– 44 °C.

**TLC:**  $R_f = 0.46$  (Hexane/EtOAc = 10:1) [UV, KMnO<sub>4</sub>].

**<sup>1</sup>H NMR** (600 MHz, CDCl<sub>3</sub>)  $\delta$  7.79 (d,  $J = 8.1$  Hz, 1H), 7.67 (m, 2H), 7.48 – 7.36 (m, 5H), 7.30 (m, 1H), 7.16 (dd,  $J = 8.3, 2.0$  Hz, 1H), 7.03 (d,  $J = 8.9$  Hz, 1H), 7.01 – 6.94 (m, 2H), 6.65 (s, 1H), 6.52 (s, 1H), 5.98 (s, 1H), 4.75 (s, 1H), 4.48 (s, 2H), 1.38 (s, 9H), 1.22 (s, 9H).

**<sup>13</sup>C NMR** (101 MHz, CDCl<sub>3</sub>)  $\delta$  155.3, 151.3, 145.6, 143.4, 139.9, 139.6, 137.4, 132.9, 132.6, 131.2, 130.7, 128.8, 128.1, 128.0, 127.9, 127.0, 126.7, 126.6, 126.5, 126.0, 122.8, 119.7, 118.3, 114.0, 111.8, 107.9, 46.7, 34.3, 34.3, 31.6, 30.1.

IR (neat/cm<sup>-1</sup>) 2958.4, 1540.0, 1263.6, 1195.9, 886.1, 760.7, 458.7.

HRMS (ESI): C<sub>37</sub>H<sub>38</sub>Cl<sub>2</sub>NO<sub>3</sub><sup>+</sup> [(M+H)<sup>+</sup>]: calcd.: 614.2223; found: 614.2222.

**4-(tert-butyl)-5-(4-(tert-butyl)phenoxy)-2-((2-((naphthalen-2-ylmethyl)amino)naphthalen-1-yl)oxy)phenol 3p**

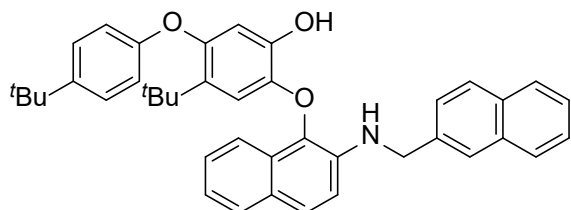

A brown solid, 89 mg, 71% yield.

m.p.: 58– 60 °C.

TLC: R<sub>f</sub> = 0.23 (Hexane/EtOAc = 10:1) [UV, KMnO<sub>4</sub>].

<sup>1</sup>H NMR (600 MHz, CDCl<sub>3</sub>) δ 7.89 – 7.75 (m, 5H), 7.73 – 7.63 (m, 2H), 7.54 – 7.48 (m, 2H), 7.46 – 7.38 (m, 2H), 7.37 (dd, *J* = 9.2, 2.4 Hz, 2H), 7.20 (d, *J* = 8.9 Hz, 1H), 6.96 (dd, *J* = 8.3, 1.7 Hz, 2H), 6.80 (d, *J* = 8.9 Hz, 1H), 6.63 (s, 1H), 6.60 (s, 1H), 4.71 (s, 2H), 1.37 (s, 9H), 1.23 (s, 9H).

<sup>13</sup>C NMR (101 MHz, CDCl<sub>3</sub>) δ 155.4, 153.2, 151.1, 145.5, 143.5, 139.7, 138.0, 136.9, 133.5, 132.8, 132.5, 128.6, 128.1, 128.0, 127.7, 126.8, 126.6, 126.5, 126.4, 126.3, 125.8, 125.6, 125.2, 122.5, 119.6, 118.2, 114.8, 114.5, 112.1, 107.9, 48.0, 34.3, 34.3, 31.6, 30.2.

IR (neat/cm<sup>-1</sup>) 2957.1630.0, 1362.8, 1262.8, 803.3, 436.4, 421.6.

HRMS (ESI): C<sub>41</sub>H<sub>42</sub>NO<sub>3</sub><sup>+</sup> [(M+H)<sup>+</sup>]: calcd.: 596.3159; found: 596.3158.

**4-(tert-butyl)-5-(4-(tert-butyl)phenoxy)-2-((2-(ethylamino)naphthalen-1-yl)oxy)phenol 3q**

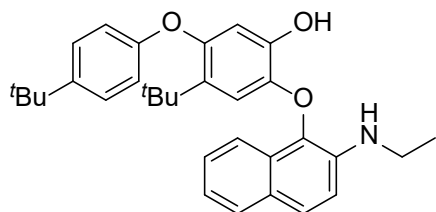

A brown oil, 71 mg, 73% yield.

TLC: R<sub>f</sub> = 0.38 (Hexane/EtOAc = 10:1) [UV, KMnO<sub>4</sub>].

<sup>1</sup>H NMR (600 MHz, CDCl<sub>3</sub>) δ 7.78 (d, *J* = 8.1 Hz, 1H), 7.72 (d, *J* = 8.8 Hz, 1H), 7.67 – 7.61 (m, 1H), 7.42 – 7.34 (m, 3H), 7.26 – 7.20 (m, 2H), 7.00 – 6.90 (m, 2H), 6.60 (s, 1H), 6.48 (s, 1H), 3.38 (q, *J* = 7.1 Hz, 2H), 1.36 (s, 9H), 1.26 (t, *J* = 7.1 Hz, 3H), 1.17 (s, 9H).

$^{13}\text{C}$  NMR (101 MHz,  $\text{CDCl}_3$ )  $\delta$  155.4, 151.2, 145.6, 143.7, 139.8, 138.4, 132.7, 128.2, 128.1, 127.7, 126.8, 126.7, 126.6, 126.5, 122.5, 119.7, 118.4, 114.6, 112.3, 107.9, 38.6, 34.4, 34.3, 31.7, 30.2, 15.6.

IR (neat/ $\text{cm}^{-1}$ ) 2958.9, 1611.4, 1391.8, 1200.6, 1180.8, 1111.1, 852.2.

HRMS (ESI):  $\text{C}_{32}\text{H}_{38}\text{NO}_3^+$  [(M+H) $^+$ ]: calcd.: 484.2846; found: 484.2844.

**4-(tert-butyl)-5-(4-(tert-butyl)phenoxy)-2-((2-(butylamino)naphthalen-1-yl)oxy)phenol 3r**

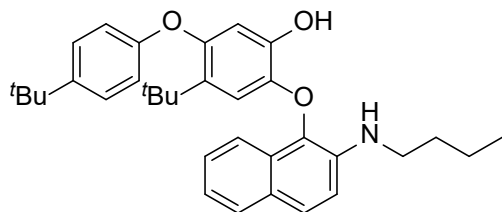

A white solid, 90 mg, 86% yield.

m.p.: 56– 58 °C.

TLC:  $R_f$  = 0.45 (Hexane/EtOAc = 10:1) [UV,  $\text{KMnO}_4$ ].

$^1\text{H}$  NMR (400 MHz,  $\text{CDCl}_3$ )  $\delta$  7.77 (d,  $J$  = 8.1 Hz, 1H), 7.71 (d,  $J$  = 8.9 Hz, 1H), 7.65 (m, 1H), 7.41 – 7.34 (m, 3H), 7.30 – 7.20 (m, 2H), 6.95 (d,  $J$  = 8.9 Hz, 2H), 6.61 (s, 1H), 6.48 (s, 1H), 3.32 (t,  $J$  = 7.1 Hz, 2H), 1.67 – 1.56 (m, 2H), 1.43 – 1.37 (m, 2H), 1.37 (s, 9H), 1.17 (s, 9H), 0.96 (t,  $J$  = 7.3 Hz, 3H).

$^{13}\text{C}$  NMR (101 MHz,  $\text{CDCl}_3$ )  $\delta$  155.5, 151.2, 145.6, 143.7, 139.8, 138.4, 132.7, 132.6, 128.3, 128.1, 127.6, 126.8, 126.6, 126.6, 122.4, 119.7, 118.3, 114.6, 112.2, 108.0, 43.7, 34.4, 34.3, 32.2, 31.7, 30.2, 20.2, 14.0.

IR (neat/ $\text{cm}^{-1}$ ) 2956.5, 1603.3, 1497.7, 1420.2, 1222.5, 1175.6, 1043.6, 829.0.

HRMS (ESI):  $\text{C}_{34}\text{H}_{42}\text{NO}_3^+$  [(M+H) $^+$ ]: calcd.: 512.3159; found: 512.3160

**2-((2-(Allylamino)naphthalen-1-yl)oxy)-4-(tert-butyl)-5-(4-(tert-butyl)phenoxy)phenol 3s**

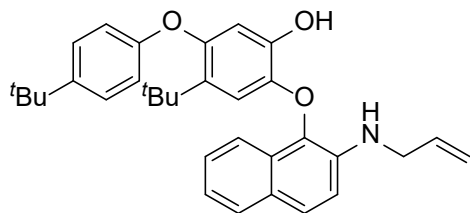

A white solid, 89 mg, 90% yield.

m.p.: 134– 136 °C.

**TLC:**  $R_f = 0.42$  (Hexane/EtOAc = 10:1) [UV, KMnO<sub>4</sub>].

**<sup>1</sup>H NMR** (600 MHz, CDCl<sub>3</sub>)  $\delta$  7.79 (d,  $J = 8.1$  Hz, 1H), 7.71 (d,  $J = 8.8$  Hz, 1H), 7.65 (m, 1H), 7.45 – 7.33 (m, 3H), 7.33 – 7.23 (m, 1H), 7.20 (d,  $J = 8.9$  Hz, 1H), 6.97 (d,  $J = 8.9$  Hz, 2H), 6.63 (s, 1H), 6.49 (s, 1H), 6.05 – 5.88 (m, 1H), 5.27 (dd,  $J = 17.2, 1.6$  Hz, 1H), 5.18 (dd,  $J = 10.3, 1.5$  Hz, 1H), 4.04 – 3.94 (m, 2H), 1.38 (s, 9H), 1.19 (s, 9H).

**<sup>13</sup>C NMR** (101 MHz, CDCl<sub>3</sub>)  $\delta$  155.4, 151.2, 145.6, 143.6, 139.8, 138.0, 135.4, 132.7, 132.7, 128.2, 128.1, 127.8, 126.8, 126.6, 126.5, 122.6, 119.7, 118.3, 116.3, 114.7, 112.1, 108.0, 46.2, 34.4, 34.3, 31.7, 30.2.

**IR** (neat/cm<sup>-1</sup>) 3507.3, 1628.8, 1498.9, 1223.6, 1044.1, 885.5, 799.5, 569.8, 494.8.

**HRMS (ESI):** C<sub>33</sub>H<sub>38</sub>NO<sub>3</sub><sup>+</sup> [(M+H)<sup>+</sup>]: calcd.: 496.2846; found: 496.2844.

**4-(tert-butyl)-5-(4-(tert-butyl)phenoxy)-2-((2-(prop-2-yn-1-ylamino)naphthalen-1-yl)oxy)phenol 3t**

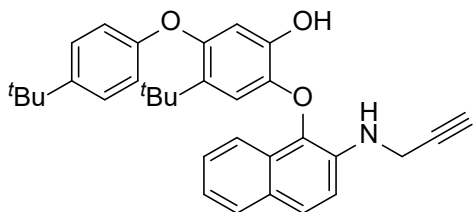

A white solid, 90 mg, 91 % yield.

**m.p.:** 158– 160 °C.

**TLC:**  $R_f = 0.17$  (Hexane/EtOAc = 5:1) [UV, KMnO<sub>4</sub>].

**<sup>1</sup>H NMR** (600 MHz, CDCl<sub>3</sub>)  $\delta$  7.79 (m, 2H), 7.64 (d,  $J = 8.4$  Hz, 1H), 7.46 – 7.37 (m, 3H), 7.36 – 7.26 (m, 2H), 6.98 (d,  $J = 8.9$  Hz, 2H), 6.64 (s, 1H), 6.48 (s, 1H), 6.14 (s, 1H), 4.53 (s, 1H), 4.12 (s, 2H), 2.20 (s, 1H), 1.38 (s, 9H), 1.18 (s, 9H).

**<sup>13</sup>C NMR (101 MHz, CDCl<sub>3</sub>)**  $\delta$  155.4, 151.3, 145.6, 143.5, 139.9, 137.0, 133.7, 132.8, 128.5, 128.1, 128.0, 126.9, 126.6, 126.6, 123.1, 120.0, 118.4, 114.8, 112.1, 107.9, 81.1, 71.5, 34.4, 34.4, 33.5, 31.7, 30.1.

**IR** (neat/cm<sup>-1</sup>) 3501.7, 1629.0, 1499.3, 1420.8, 1391.6, 1196.0, 832.8, 438.2.

**HRMS (ESI):** C<sub>33</sub>H<sub>36</sub>NO<sub>3</sub><sup>+</sup> [(M+H)<sup>+</sup>]: calcd.: 494.2690; found: 494.2689.

**2-((2-(Benzylamino)-6-bromonaphthalen-1-yl)oxy)-4-(tert-butyl)-5-(4-(tert-butyl)phenoxy)phenol 3u**

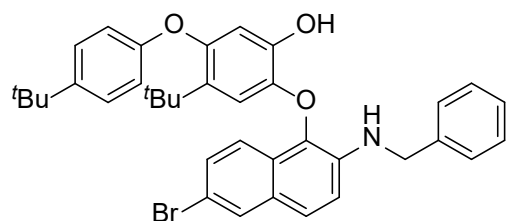

A brown solid, 101 mg, 82% yield.

**m.p.:** 76–78 °C.

**TLC:**  $R_f = 0.85$  (Hexane/EtOAc = 10:1) [UV, KMnO<sub>4</sub>].

**<sup>1</sup>H NMR** (600 MHz, CDCl<sub>3</sub>)  $\delta$  7.91 (d,  $J = 1.9$  Hz, 1H), 7.54 (m, 2H), 7.47 – 7.41 (m, 1H), 7.39 – 7.36 (m, 2H), 7.34 – 7.32 (m, 2H), 7.15 (d,  $J = 9.0$  Hz, 1H), 7.00 – 6.91 (m, 2H), 6.80 (d,  $J = 8.7$  Hz, 3H), 6.62 (s, 1H), 6.49 (s, 1H), 4.55 (s, 2H), 1.37 (s, 9H), 1.21 (s, 9H).

**<sup>13</sup>C NMR** (101 MHz, CDCl<sub>3</sub>)  $\delta$  155.3, 153.2, 151.3, 145.6, 143.5, 143.4, 139.5, 139.1, 138.2, 132.9, 132.3, 130.0, 129.9, 128.8, 128.6, 127.4, 126.9, 126.7, 126.5, 126.4, 125.7, 121.5, 118.3, 115.9, 115.4, 114.8, 111.8, 108.0, 47.5, 34.3, 34.1, 31.6, 30.1.

**IR** (neat/cm<sup>-1</sup>) 3508.9, 3410.7, 1628.2, 1534.1, 1258.8, 1175.6 860.6 811.5.

**HRMS (ESI):** C<sub>37</sub>H<sub>39</sub>BrNO<sub>3</sub><sup>+</sup> [(M+H)<sup>+</sup>]: calcd.: 624.2108; found: 624.2105.

**2-((2-(benzylamino)-6-methylnaphthalen-1-yl)oxy)-4-(tert-butyl)-5-(4-(tert-butyl)phenoxy)phenol 3v**

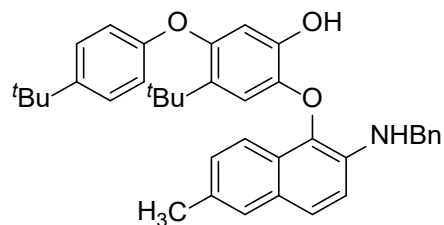

A brown oil, 100 mg, 89% yield.

**TLC:**  $R_f = 0.54$  (Hexane/EtOAc = 10:1) [UV, KMnO<sub>4</sub>].

**<sup>1</sup>H NMR** (400 MHz, CDCl<sub>3</sub>)  $\delta$  7.54 (dd,  $J = 8.7, 4.8$  Hz, 2H), 7.50 (s, 1H), 7.33 (s, 1H), 7.31 – 7.29 (m, 5H), 7.26 – 7.23 (m, 1H), 7.19 (dd,  $J = 8.7, 1.7$  Hz, 1H), 7.07 (d,  $J = 8.9$  Hz, 1H), 6.91 (d,  $J = 8.7$  Hz, 2H), 6.57 (s, 1H), 6.51 (s, 1H), 5.99 (brs, 1H), 4.49 (s, 2H), 2.43 (s, 3H), 1.32 (s, 9H), 1.17 (s, 9H).

**<sup>13</sup>C NMR** (101 MHz, CDCl<sub>3</sub>)  $\delta$  155.5, 151.2, 145.6, 143.6, 139.9, 139.6, 137.3, 132.84, 132.77,

132.0, 129.2, 128.8, 128.2, 127.4, 127.09, 127.07, 126.6, 126.5, 125.9, 119.7, 118.4, 114.7, 112.2, 108.0, 47.9, 34.40, 34.38, 31.7, 30.2, 21.5.

**IR** (neat/cm<sup>-1</sup>) 2959.4, 1570.0, 1163.6, 1070.9, 986.1, 760.7, 657.1.

**HRMS (ESI):** C<sub>38</sub>H<sub>42</sub>NO<sub>3</sub><sup>+</sup> [(M+H)<sup>+</sup>]: calcd.: 560.3159; found: 560.3160.

**2-((2-(benzylamino)-6-phenylnaphthalen-1-yl)oxy)-4-(tert-butyl)-5-(4-(tert-butyl)phenoxy)phenol 3w**

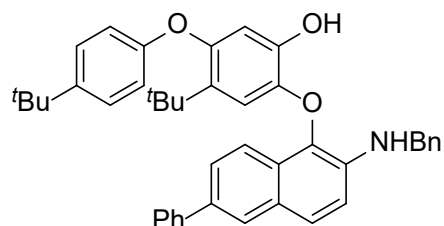

A colorless oil, 107 mg, 86% yield.

**TLC:** *R*<sub>f</sub> = 0.47 (Hexane/EtOAc = 8:1) [UV, KMnO<sub>4</sub>].

**<sup>1</sup>H NMR** (500 MHz, CDCl<sub>3</sub>) δ 7.98 (s, 1H), 7.76 – 7.66 (m, 5H), 7.48 (t, *J* = 7.7 Hz, 2H), 7.38 – 7.34 (m, 6H), 7.31– 7.28 (m, 2H), 7.16 (d, *J* = 8.9 Hz, 1H), 6.96 (d, *J* = 8.7 Hz, 2H), 6.63 (s, 1H), 6.58 (s, 1H), 6.02 (brs, 1H), 4.75 (brs, 1H), 4.56 (s, 2H), 1.36 (s, 9H), 1.22 (s, 9H).

**<sup>13</sup>C NMR** (101 MHz, CDCl<sub>3</sub>) δ 155.3, 151.2, 145.5, 143.5, 141.1, 139.7, 139.3, 138.0, 135.1, 132.8, 132.4, 128.9, 128.8, 127.9, 127.3, 127.1, 127.0, 127.0, 126.9, 126.5, 126.5, 125.9, 120.2, 118.3, 114.8, 112.0, 107.9, 47.6, 34.3, 31.6, 30.1.

**IR** (neat/cm<sup>-1</sup>) 2956.2, 1640.2, 1510.1, 1240.9, 1195.8, 1072.9, 1090.5, 640.0.

**HRMS (ESI):** C<sub>43</sub>H<sub>44</sub>NO<sub>3</sub><sup>+</sup> [(M+H)<sup>+</sup>]: calcd.: 622.3316; found: 622.3318.

**2-((2-(benzylamino)-7-bromonaphthalen-1-yl)oxy)-4-(tert-butyl)-5-(4-(tert-butyl)phenoxy)phenol 3x**

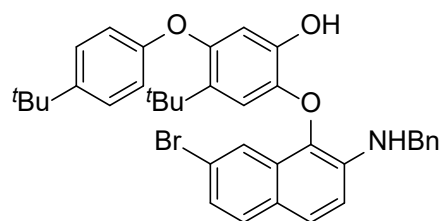

A white solid, 104 mg, 83% yield.

**m.p.:** 71– 73 °C.



**TLC:**  $R_f = 0.81$  (Hexane/EtOAc = 10:1) [UV, KMnO<sub>4</sub>].

**<sup>1</sup>H NMR** (400 MHz, CDCl<sub>3</sub>)  $\delta$  7.79 (s, 1H), 7.57 (dd,  $J = 8.9, 1.8$  Hz, 2H), 7.42 – 7.23 (m, 8H), 7.09 (d,  $J = 8.9$  Hz, 1H), 6.95 (d,  $J = 8.7$  Hz, 2H), 6.60 (s, 1H), 6.48 (s, 1H), 5.99 (brs, 1H), 4.68 (brs, 1H), 4.51 (s, 2H), 1.35 (s, 9H), 1.21 (s, 9H).

**<sup>13</sup>C NMR** (101 MHz, CDCl<sub>3</sub>)  $\delta$  155.4, 151.5, 145.7, 143.6, 139.3, 139.1, 138.6, 132.9, 131.3, 129.8, 129.5, 128.9, 127.5, 127.0, 126.7, 126.6, 126.0, 125.9, 121.9, 121.5, 118.4, 114.8, 111.8, 108.2, 47.6, 34.4, 31.7, 30.2.

**IR** (neat/cm<sup>-1</sup>) 2957.2, 1670.2, 1560.1, 1244.9, 1195.8, 1072.9, 640.0, 540.1.

**HRMS (ESI):** C<sub>37</sub>H<sub>39</sub>BrNO<sub>3</sub><sup>+</sup> [(M+H)<sup>+</sup>]: calcd.: 624.2108; found: 624.2105.

**2-((2-(benzylamino)-3-methylnaphthalen-1-yl)oxy)-4-(tert-butyl)-5-(4-(tert-butyl)phenoxy)phenol 3y**

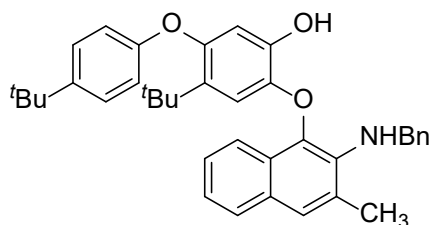

A colorless oil, 90 mg, 81% yield.

**TLC:**  $R_f = 0.55$  (Hexane/EtOAc = 10:1) [UV, KMnO<sub>4</sub>].

**<sup>1</sup>H NMR** (500 MHz, CDCl<sub>3</sub>)  $\delta$  7.86 (d,  $J = 8.2$ , 1H), 7.73 (d,  $J = 7.8$ , 1H), 7.54 (s, 1H), 7.40 – 7.24 (m, 10H), 6.93 (d,  $J = 8.7$  Hz, 2H), 6.76 (s, 1H), 6.53 (s, 1H), 4.37 (s, 2H), 2.47 (s, 3H), 1.34 (s, 9H), 1.23 (s, 9H).

**<sup>13</sup>C NMR** (151 MHz, CDCl<sub>3</sub>, CDCl<sub>3</sub>)  $\delta$  155.4, 151.5, 145.5, 144.6, 140.9, 139.8, 138.9, 137.6, 132.3, 130.3, 129.9, 128.8, 128.1, 127.6, 127.3, 126.7, 126.6, 125.8, 124.3, 121.1, 118.4, 114.6, 108.3, 52.6, 34.39, 34.35, 31.7, 30.3, 19.2.

**IR** (neat/cm<sup>-1</sup>) 2964.4, 1570.0, 1172.6, 909.9, 986.1, 760.7, 657.1.

**HRMS (ESI):** C<sub>38</sub>H<sub>42</sub>NO<sub>3</sub><sup>+</sup> [(M+H)<sup>+</sup>]: calcd.: 560.3159; found: 560.3160.

**4-(tert-butyl)-5-(4-(tert-butyl)phenoxy)-2-((2-(phenylamino)naphthalen-1-yl)oxy)phenol 3z**

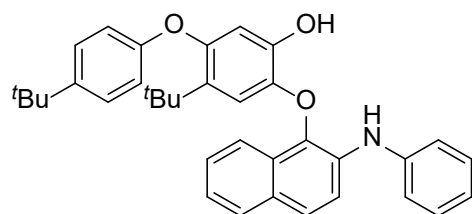

A white solid, 87 mg, 82% yield.

**m.p.:** 80– 82 °C.

**TLC:**  $R_f$  = 0.68 (Hexane/EtOAc = 10:1) [UV, KMnO<sub>4</sub>].

**<sup>1</sup>H NMR** (600 MHz, CDCl<sub>3</sub>)  $\delta$  7.83 (d,  $J$  = 8.1 Hz, 1H), 7.79 (d,  $J$  = 8.1 Hz, 1H), 7.71 (d,  $J$  = 8.9 Hz, 1H), 7.62 (d,  $J$  = 8.7 Hz, 1H), 7.45 (t,  $J$  = 7.5 Hz, 1H), 7.39-7.29 (m, 5H), 7.11 (d,  $J$  = 7.1 Hz, 2H), 7.02 (t,  $J$  = 7.4 Hz, 1H), 6.90 (d,  $J$  = 8.2 Hz, 2H), 6.66 (s, 1H), 6.57 (s, 1H), 6.05 (s, 1H), 5.89 (s, 1H), 1.37 (s, 9H), 1.23 (s, 9H).

**<sup>13</sup>C NMR** (101 MHz, CDCl<sub>3</sub>)  $\delta$  155.3, 151.3, 145.6, 143.5, 142.4, 140.0, 136.6, 133.3, 132.9, 130.0, 129.5, 128.6, 128.1, 127.0, 126.6, 126.1, 124.1, 122.1, 120.6, 119.0, 118.9, 118.3, 112.3, 108.0, 34.3, 34.3, 31.6, 30.1.

**IR** (KBr/cm<sup>-1</sup>) 2959.3, 1592.3, 1496.2, 1196.0, 762.0, 461.7.

**HRMS (ESI):** C<sub>36</sub>H<sub>38</sub>NO<sub>3</sub><sup>+</sup> [(M+H)<sup>+</sup>]: calcd.: 532.2846; found: 532.2848.

**4-(tert-butyl)-5-(4-(tert-butyl)phenoxy)-2-((2-(p-tolylamino)naphthalen-1-yl)oxy)phenol 4a**

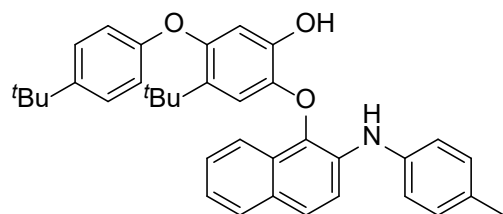

A brown oil, 97 mg, 89% yield.

**TLC:**  $R_f$  = 0.39 (Hexane/EtOAc = 3:1) [UV, KMnO<sub>4</sub>].

**<sup>1</sup>H NMR** (400 MHz, CDCl<sub>3</sub>)  $\delta$  7.82 (d,  $J$  = 8.9 Hz, 1H), 7.76 (d,  $J$  = 8.4, 1.1 Hz, 1H), 7.69 (d,  $J$  = 8.9 Hz, 1H), 7.56 (d,  $J$  = 8.9 Hz, 1H), 7.48 – 7.42 (m, 1H), 7.36 (m, 3H), 7.15 (d,  $J$  = 8.0 Hz, 2H), 7.05 (d,  $J$  = 8.4 Hz, 2H), 6.95 – 6.87 (m, 2H), 6.59 (s, 1H), 6.55 (s, 1H), 5.99 (s, 1H), 5.87 (s, 1H), 2.35 (s, 3H), 1.36 (s, 9H), 1.14 (s, 9H).

**<sup>13</sup>C NMR** (101 MHz, CDCl<sub>3</sub>)  $\delta$  155.4, 151.3, 145.6, 143.6, 139.9, 139.6, 135.6, 134.3, 132.9, 132.2, 130.1, 129.6, 128.6, 128.1, 127.0, 126.6, 126.2, 123.8, 120.4, 120.1, 118.4, 118.3, 112.2, 108.0, 34.4, 34.4, 31.7, 30.1, 20.9.

**IR** (neat/cm<sup>-1</sup>) 2958.6, 1631.6, 1496.7, 1390.9, 1195.8, 1072.9, 906.5, 729.0.

**HRMS (ESI):** C<sub>37</sub>H<sub>40</sub>NO<sub>3</sub><sup>+</sup> [(M+H)<sup>+</sup>]: calcd.: 546.3003; found: 546.3002.

**4-(tert-butyl)-5-(4-(tert-butyl)phenoxy)-2-((2-((3,4-dichlorophenyl)amino)naphthalen-1-yl)oxy)phenol 4b**

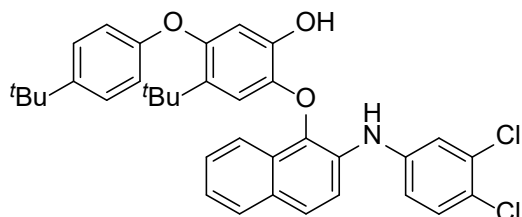

A brown oil, 98 mg, 82% yield.

**TLC:** *R*<sub>f</sub> = 0.50 (Hexane/EtOAc = 10:1) [UV, KMnO<sub>4</sub>].

**<sup>1</sup>H NMR** (400 MHz, CDCl<sub>3</sub>) δ 7.92 – 7.83 (m, 2H), 7.77 (d, *J* = 8.9 Hz, 1H), 7.55 (d, *J* = 8.9 Hz, 1H), 7.53 – 7.43 (m, 2H), 7.39 – 7.34 (m, 2H), 7.32 – 7.26 (m, 1H), 7.13 (d, *J* = 2.7 Hz, 1H), 6.90 – 6.82 (m, 3H), 6.58 (s, 1H), 6.48 (s, 1H), 5.99 (s, 1H), 5.86 (s, 1H), 1.36 (s, 9H), 1.12 (s, 9H).

**<sup>13</sup>C NMR** (101 MHz, CDCl<sub>3</sub>) δ 155.3, 151.6, 145.7, 143.5, 142.8, 140.1, 138.8, 133.2, 133.1, 131.4, 130.9, 130.8, 128.6, 128.2, 127.3, 126.6, 126.3, 125.0, 124.1, 121.0, 120.1, 118.7, 118.3, 116.9, 112.5, 108.2, 34.4, 34.3, 31.7, 30.1.

**IR** (neat/cm<sup>-1</sup>) 2959.4, 1550.0, 1263.6, 1010.9, 886.1, 760.7, 657.1, 458.7.

**HRMS (ESI):** C<sub>36</sub>H<sub>36</sub>Cl<sub>2</sub>NO<sub>3</sub><sup>+</sup> [(M+H)<sup>+</sup>]: calcd.: 600.2067; found: 600.2069.

## 4 X-ray crystallographic analysis of 3g

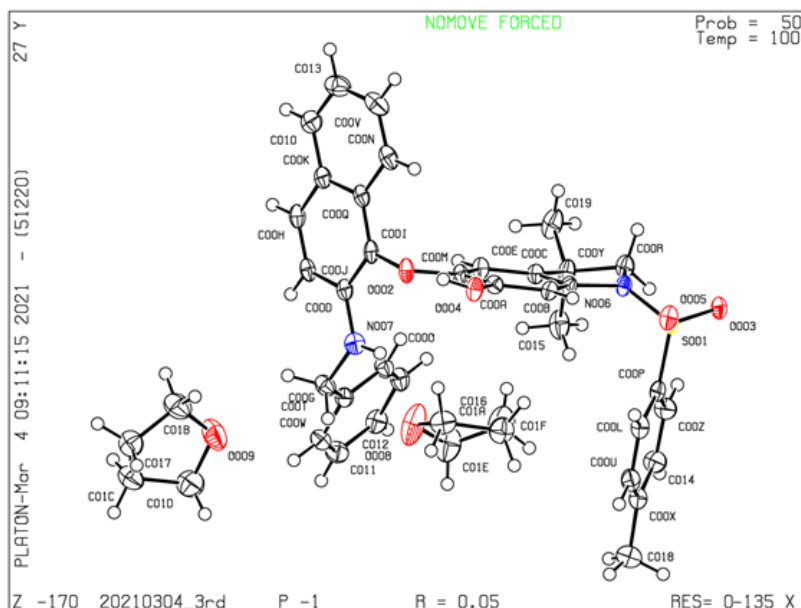

| Bond precision         | C-C = 0.0027 Å                                                                                      | Wavelength = 1.54184                                                                                |                                 |
|------------------------|-----------------------------------------------------------------------------------------------------|-----------------------------------------------------------------------------------------------------|---------------------------------|
| Cell                   | a=9.7737(1)<br>alpha=75.980(1)                                                                      | b=12.4725(1)<br>beta=78.674(1)                                                                      | c=16.1297(2)<br>gamma=74.780(1) |
| Temperature            | 100 K                                                                                               |                                                                                                     |                                 |
| Volume                 | <b>Calculated</b><br>1822.15(3)                                                                     | <b>Reported</b><br>1822.15(4)                                                                       |                                 |
| Space group            | P -1                                                                                                | P -1                                                                                                |                                 |
| Hall group             | -P 1                                                                                                | -P 1                                                                                                |                                 |
| Moiety formula         | C <sub>34</sub> H <sub>32</sub> N <sub>2</sub> O <sub>4</sub> S, 2(C <sub>4</sub> H <sub>8</sub> O) | C <sub>34</sub> H <sub>32</sub> N <sub>2</sub> O <sub>4</sub> S, 2(C <sub>4</sub> H <sub>8</sub> O) |                                 |
| Sum formula            | C <sub>42</sub> H <sub>48</sub> N <sub>2</sub> O <sub>6</sub> S                                     | C <sub>42</sub> H <sub>48</sub> N <sub>2</sub> O <sub>6</sub> S                                     |                                 |
| Mr                     | 708.88                                                                                              | 708.88                                                                                              |                                 |
| Dx, g cm <sup>-3</sup> | 1.292                                                                                               | 1.292                                                                                               |                                 |
| Z                      | 2                                                                                                   | 2                                                                                                   |                                 |
| Mu (mm <sup>-1</sup> ) | 1.202                                                                                               | 1.202                                                                                               |                                 |
| F000                   | 756.0                                                                                               | 756.0                                                                                               |                                 |
| F000'                  | 758.80                                                                                              |                                                                                                     |                                 |
| h,k,lmax               | 12,15,20                                                                                            | 12,15,20                                                                                            |                                 |
| Nref                   | 7379                                                                                                | 7236                                                                                                |                                 |
| Tmin,Tmax              |                                                                                                     | 0.882,1.000                                                                                         |                                 |
| Tmin'                  |                                                                                                     |                                                                                                     |                                 |

Correction method= # Reported T Limits: Tmin=0.882 Tmax = 1.000

AbsCorr = MULTI-SCAN

|                               |                                 |
|-------------------------------|---------------------------------|
| Data completeness= 0.981      | Theta(max)= 73.911              |
| R(reflections)= 0.0476 (6976) | wR2(reflections)= 0.1270 (7236) |
| S = 1.068                     | Npar= 464                       |

---

## 5 References

1. Škalamera, Đ. Veljković, J. Ptiček, L. Sambol, M. Mlinarić-Majerski, K. Basarić, N. Synthesis of asymmetrically disubstituted anthracenes. *Tetrahedron.*, **2017**, 73, 5892-5899.
2. Majumdar, K. C. Samanta, S. Chattopadhyay, B. Nandi, R. K. Synthesis of Azepine- and Azocine-Annulated Heterocycles by Aromatic Aza-Claisen Rearrangement and Ring-Closing Metathesis. *Synthesis.* **2010**, 863-869.
3. He, W.-P., Zhou, B.-H., Zhou, Y.-L., Li, X.-R., Fan, L.-M., Shou, H.-W. & Li, J. Synthesis of new benzimidazolium salts and their application in the asymmetric arylation of aldehydes. *Tetrahedron Lett.*, **2016**, 57, 3152-3155.
4. Chen Y.; Dubrovskiy, A.; Larock, R. C. Synthesis of Quinolines by Electrophilic Cyclization of *N*-(2-Alkynyl)Anilines: 3-Iodo-4-Phenylquinoline. *Org. Synth.*, **2012**, 89, 294-306
5. Li, G.-Q. Gao, H. Keene, C. Devonas, M. Ess, D. H. Kürti, L., Organocatalytic Aryl–Aryl Bond Formation. An Atroposelective [3,3]-Rearrangement Approach to BINAM Derivatives. *J. Am. Chem. Soc.*, **2013**, 135, 7414-7417.
6. Qi, L.-W. Li, S. Xiang, S.-H. Wang, J. Tan, B., Asymmetric construction of atropisomeric biaryls via a redox neutral cross-coupling strategy. *Nat. Catal.*, **2019**, 2, 314-323.

## 6 Copies of $^1\text{H}$ and $^{13}\text{C}$ NMR spectra of products

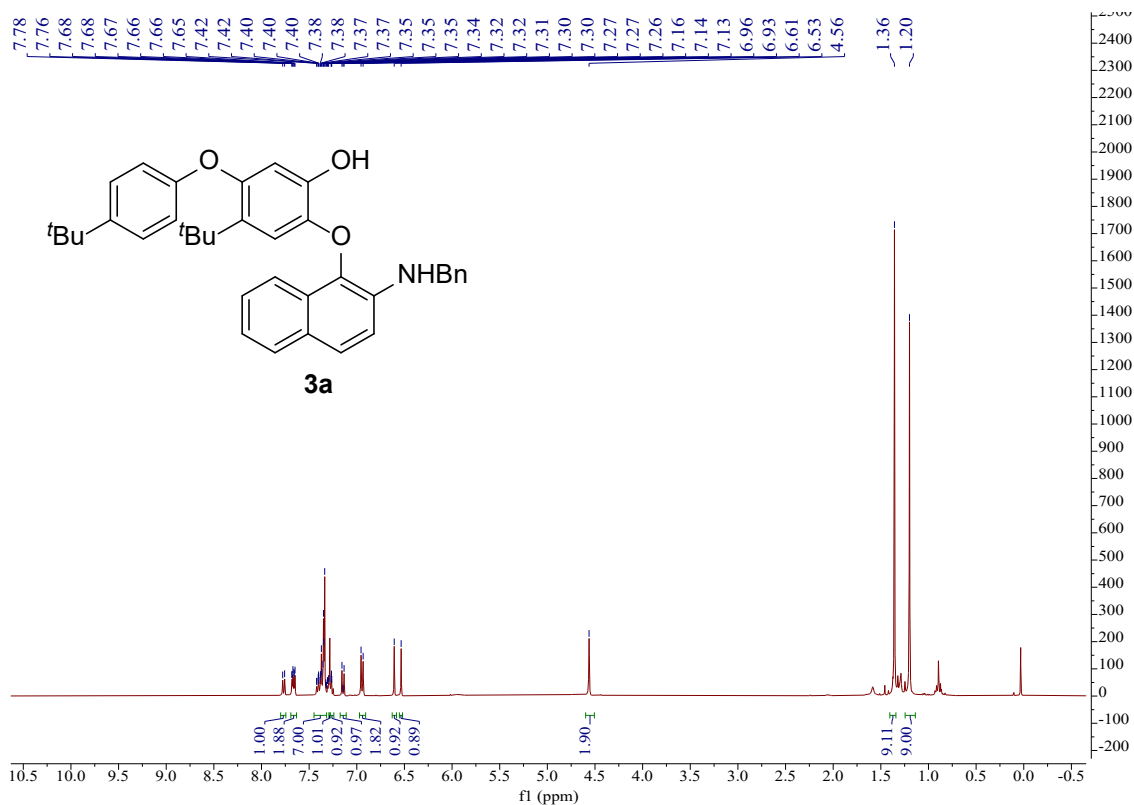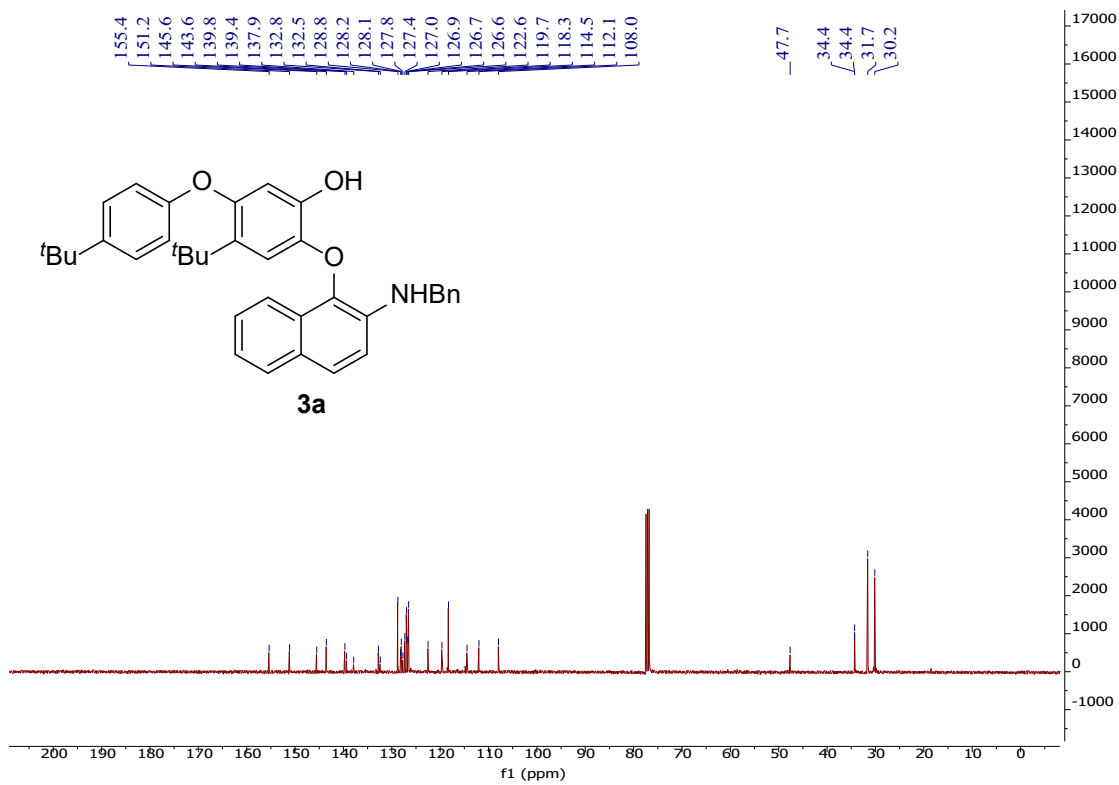

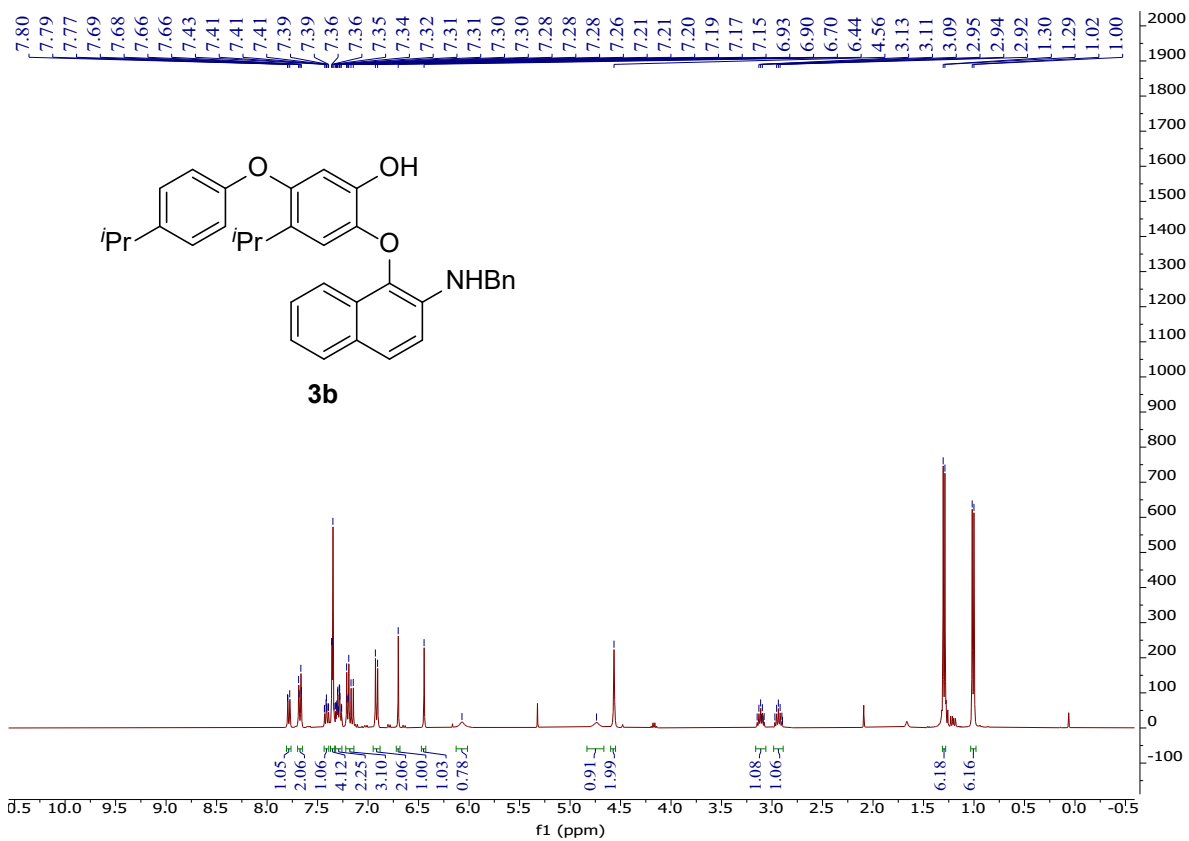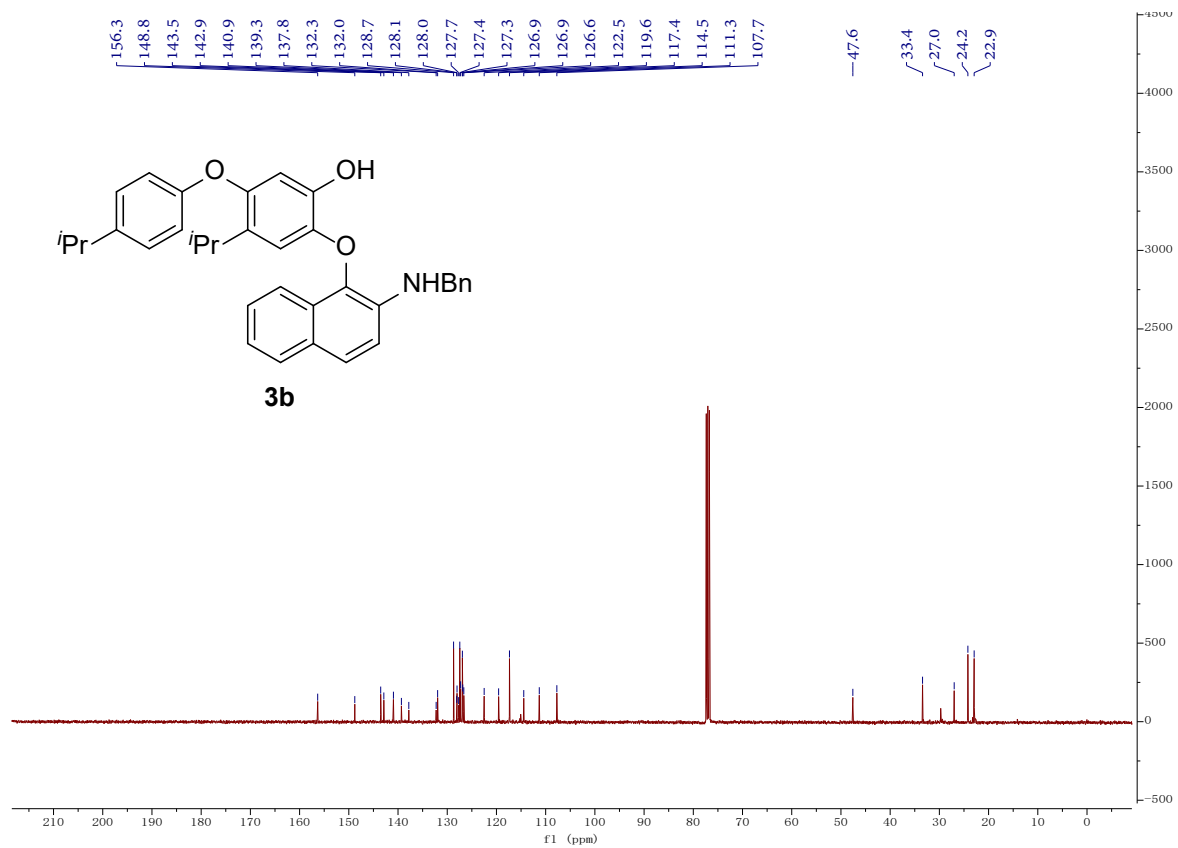

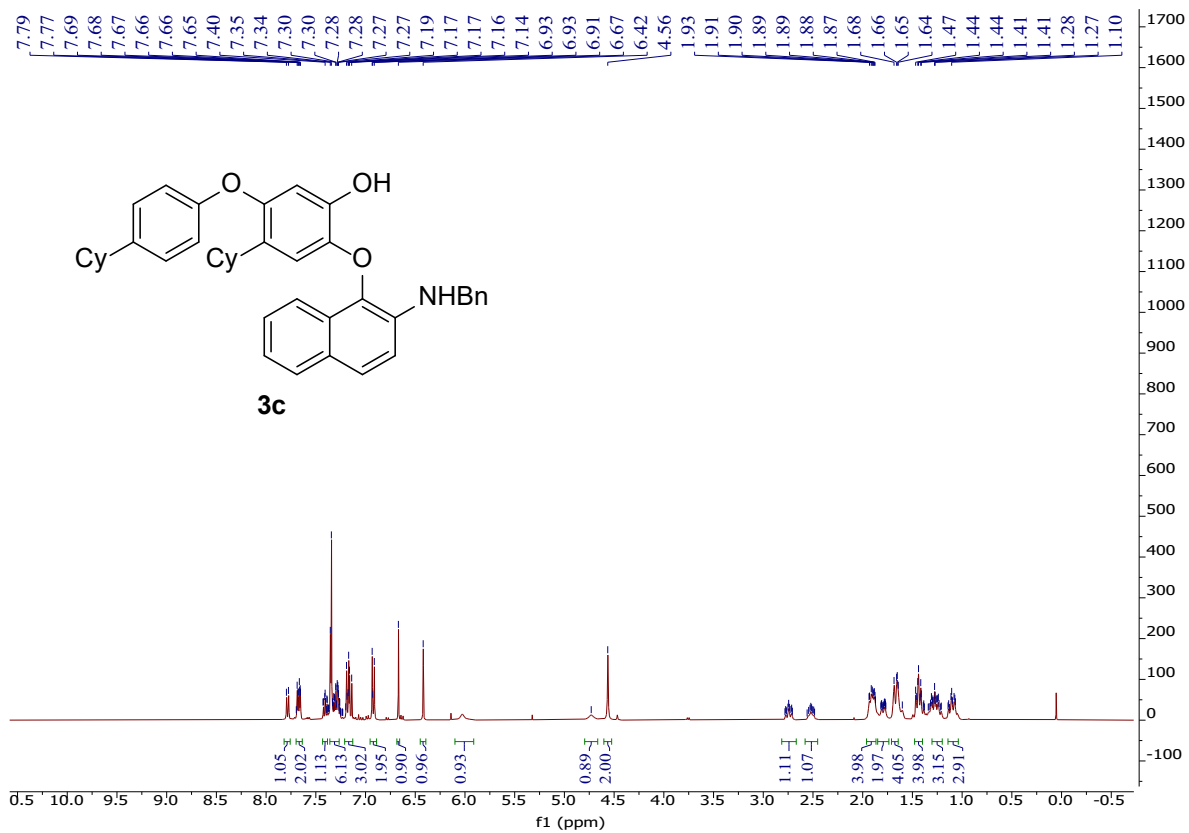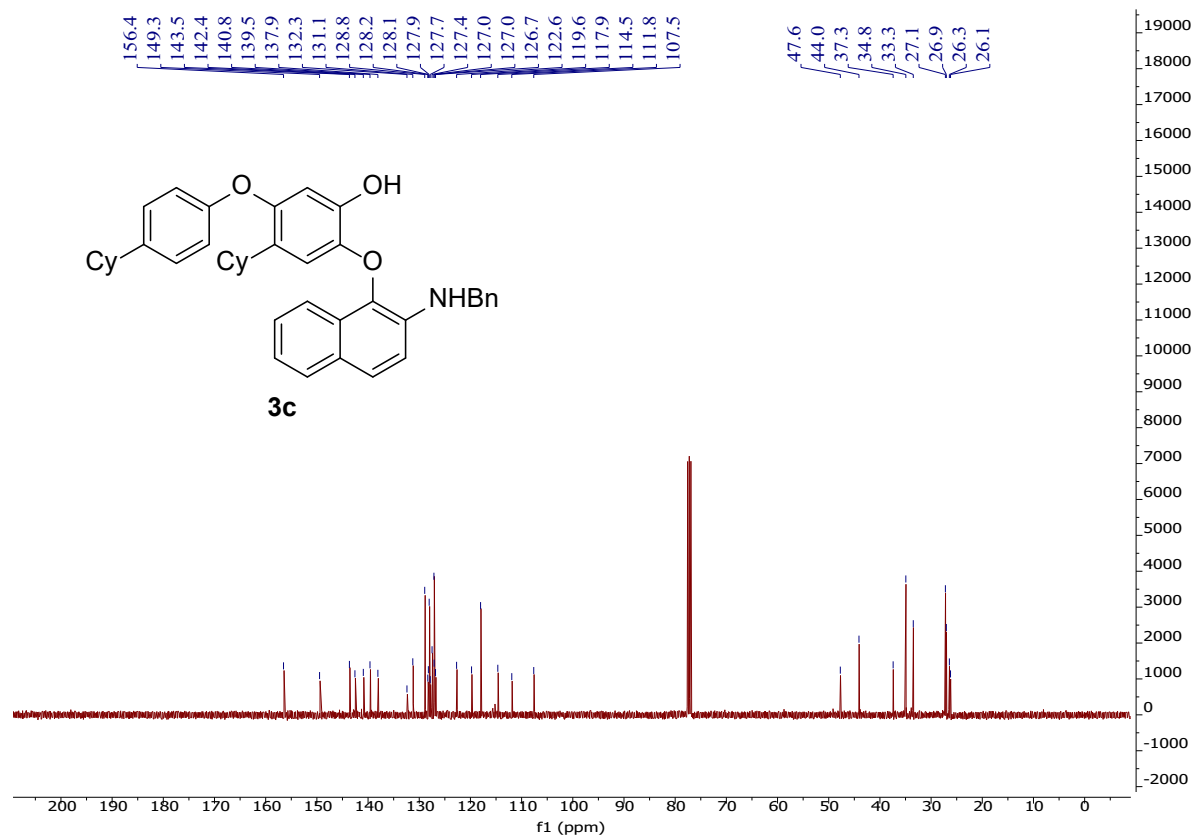



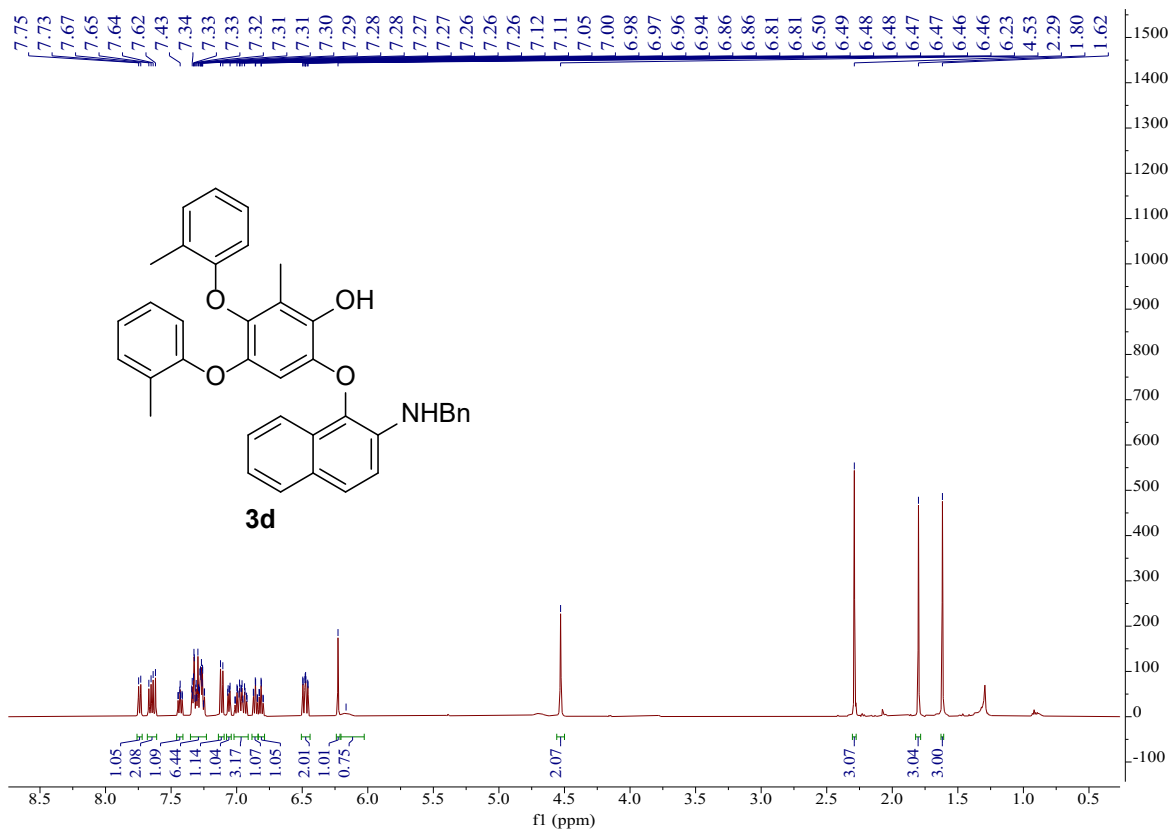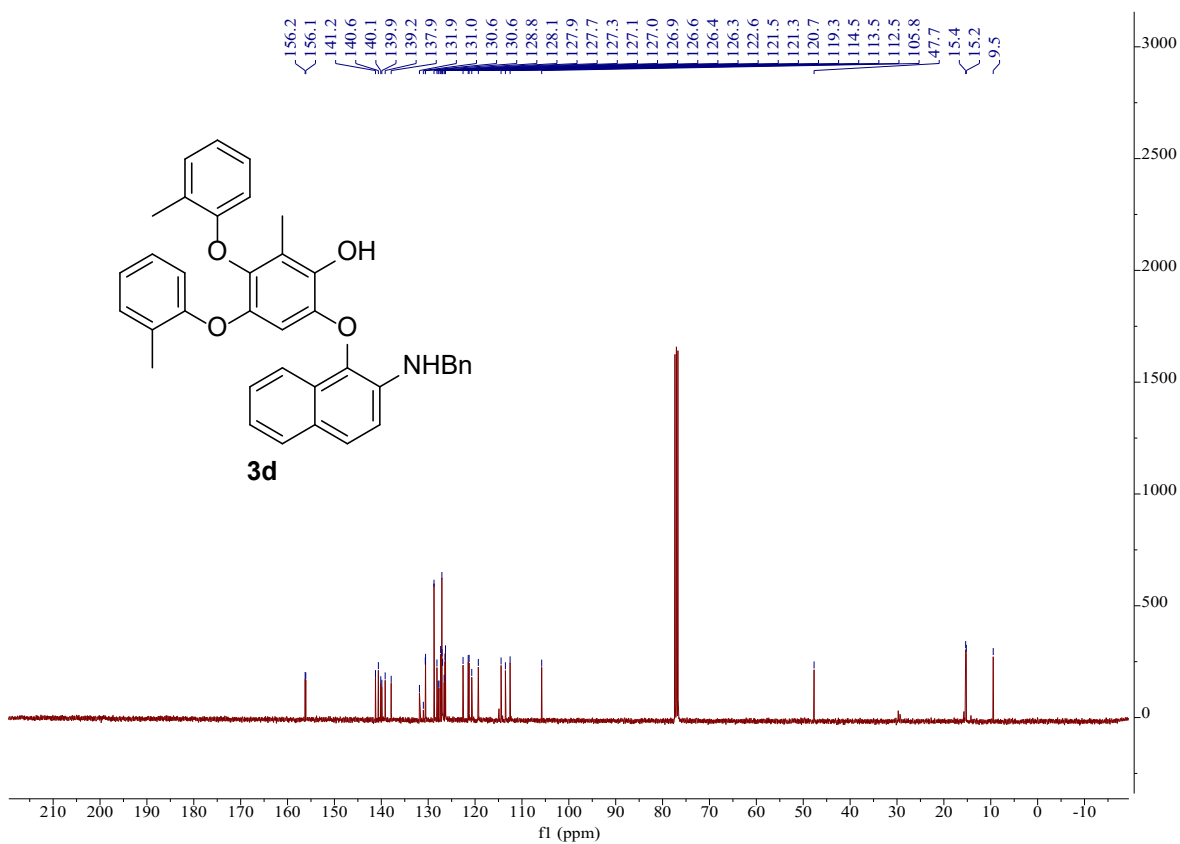

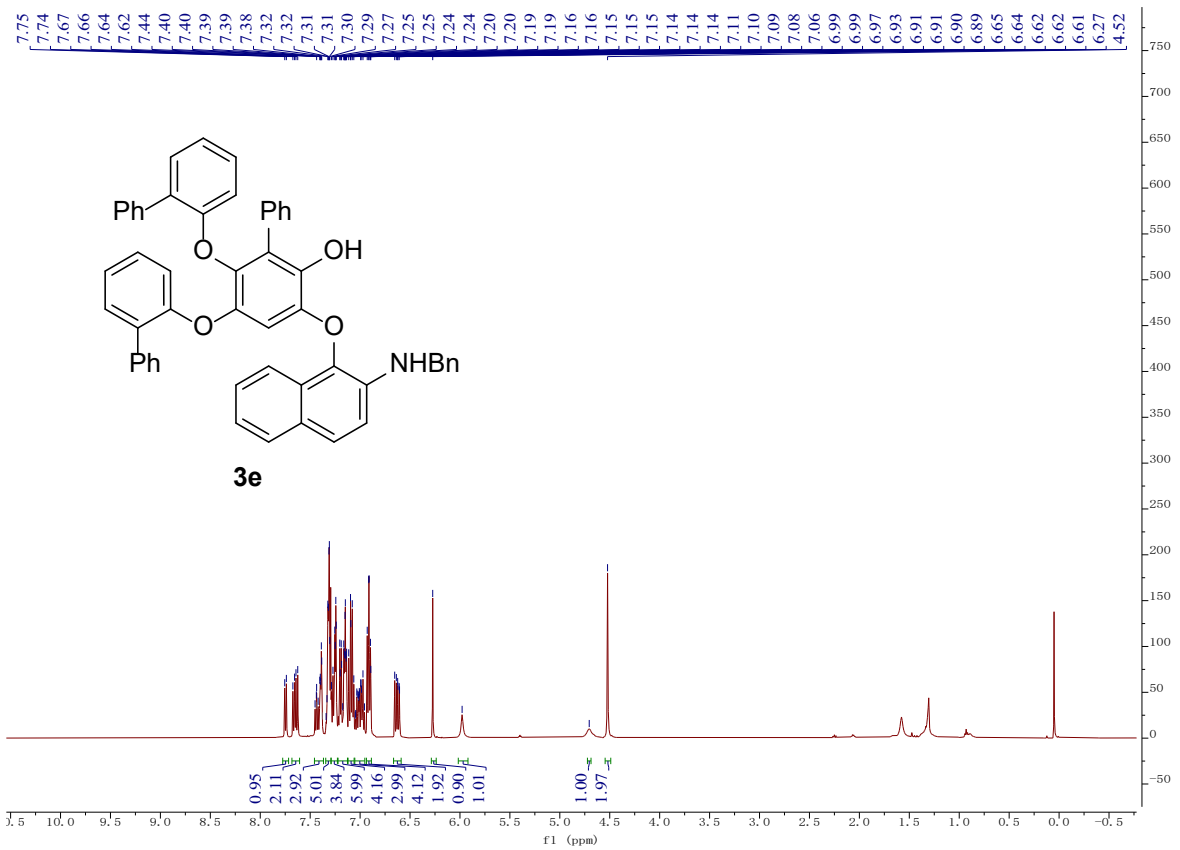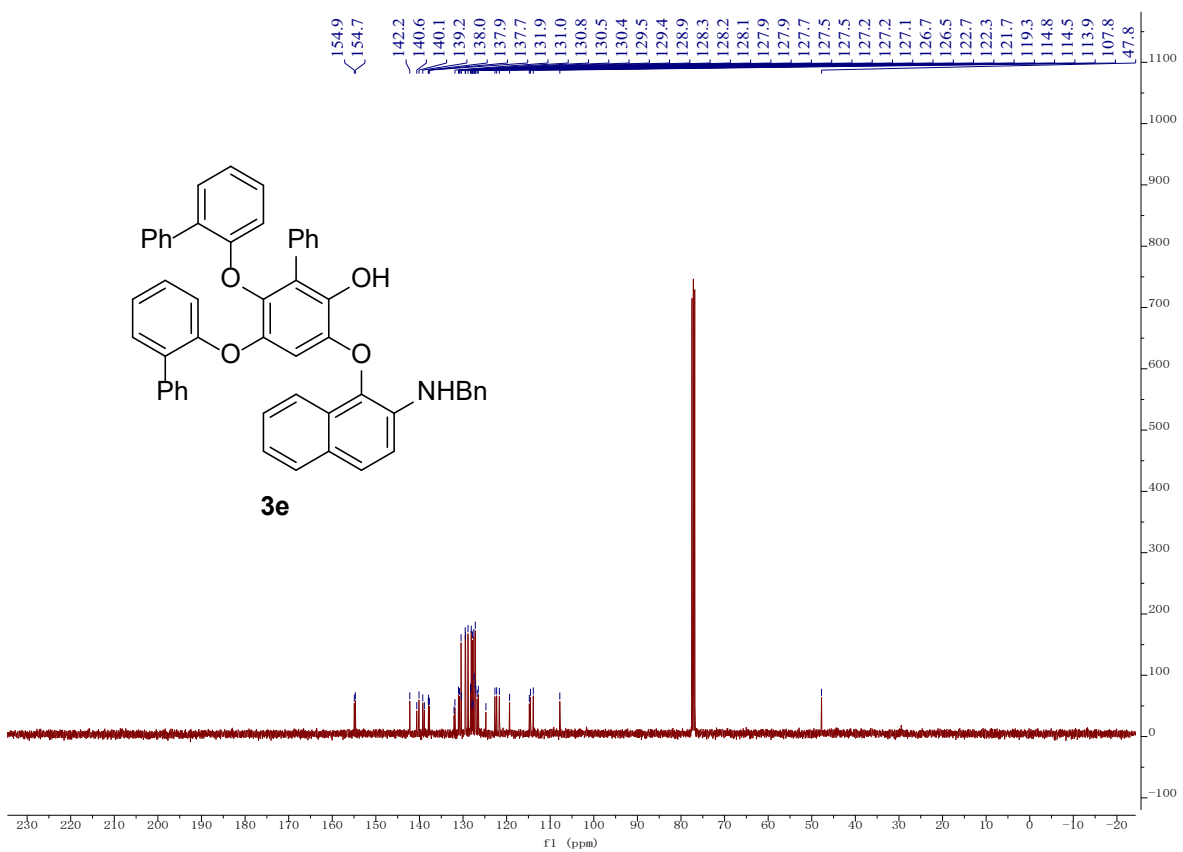

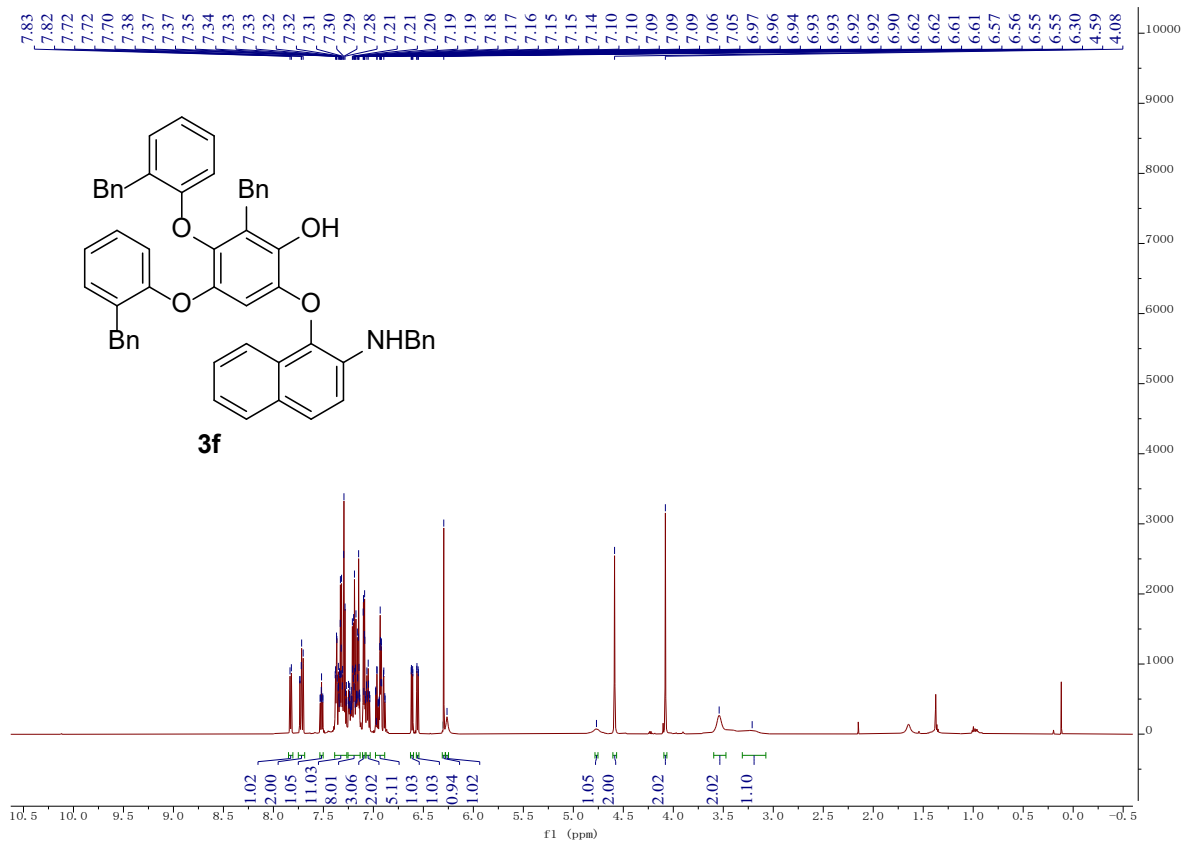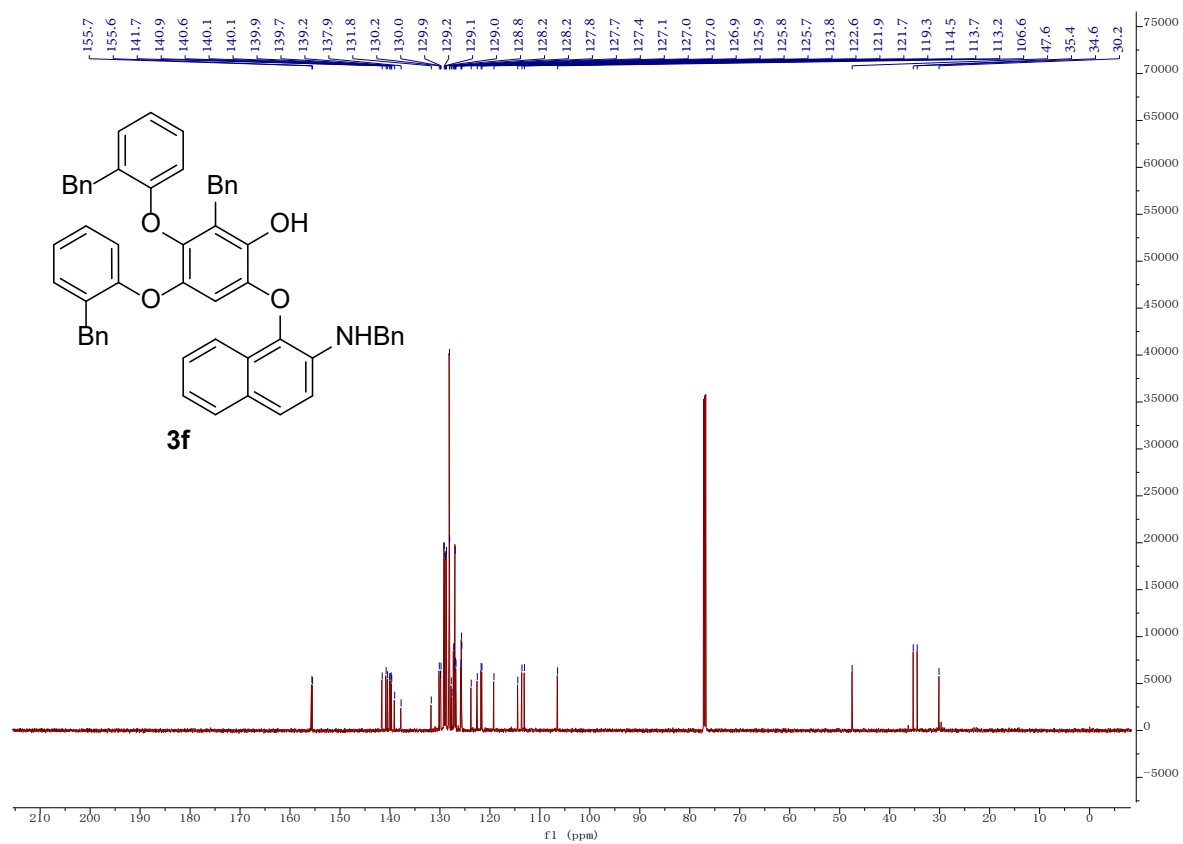

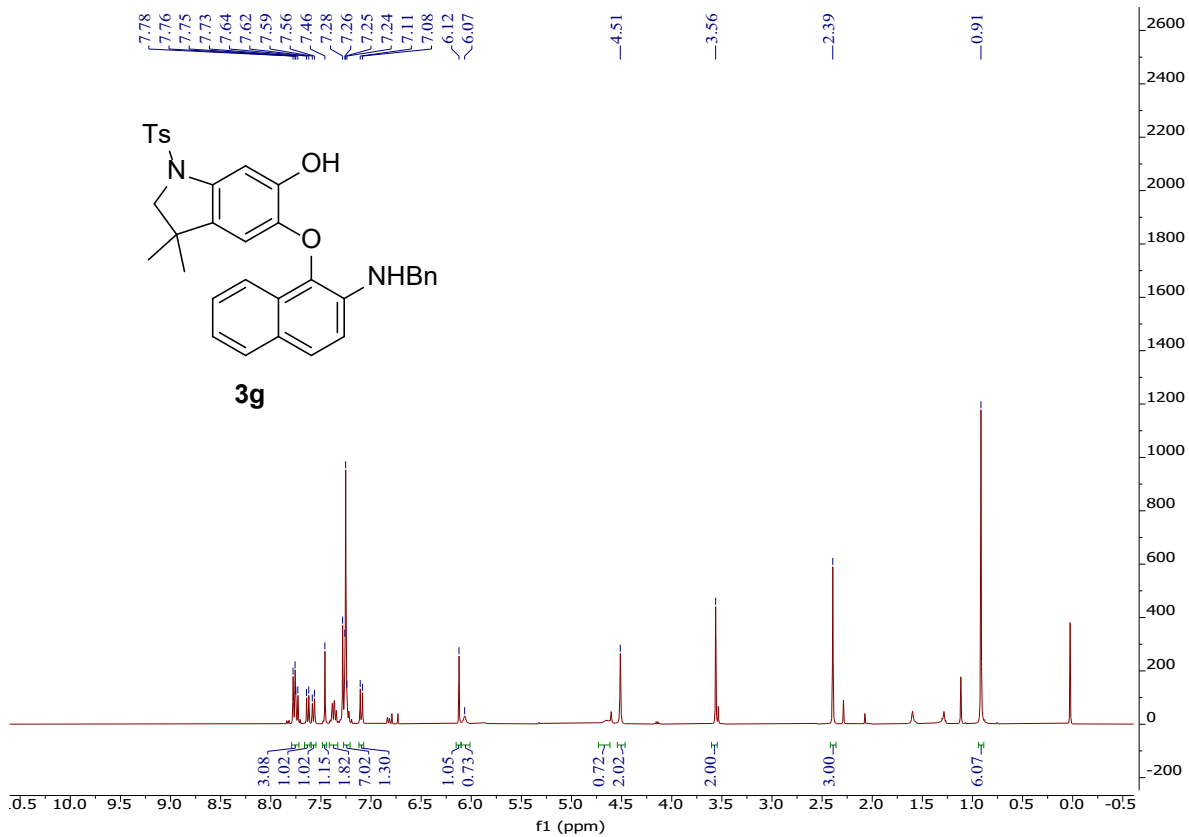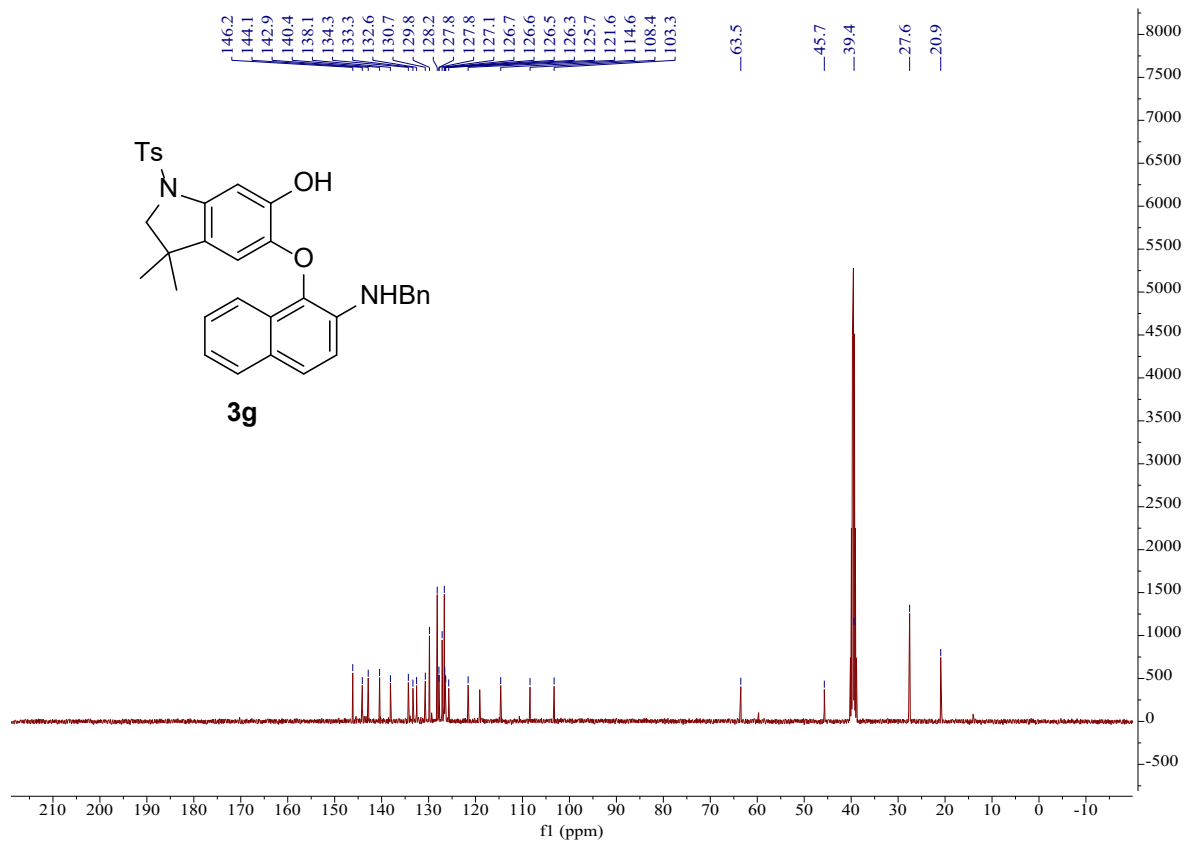

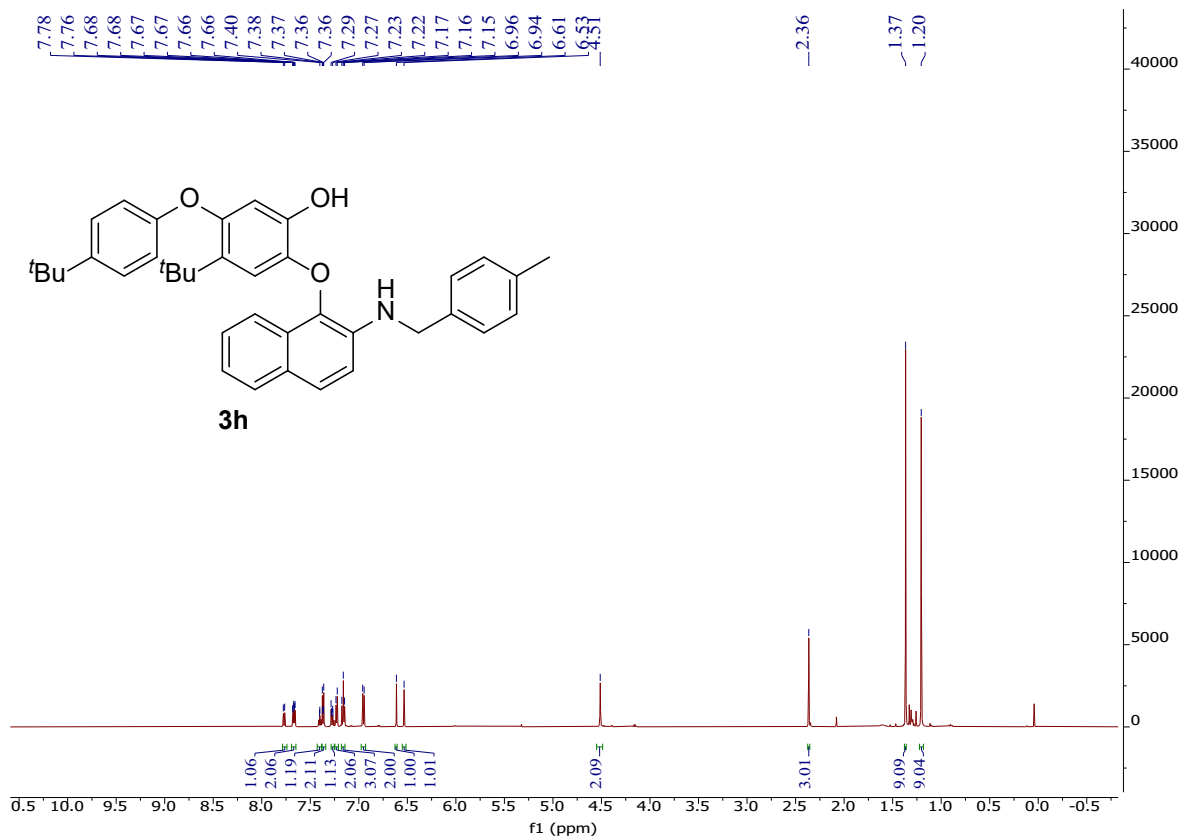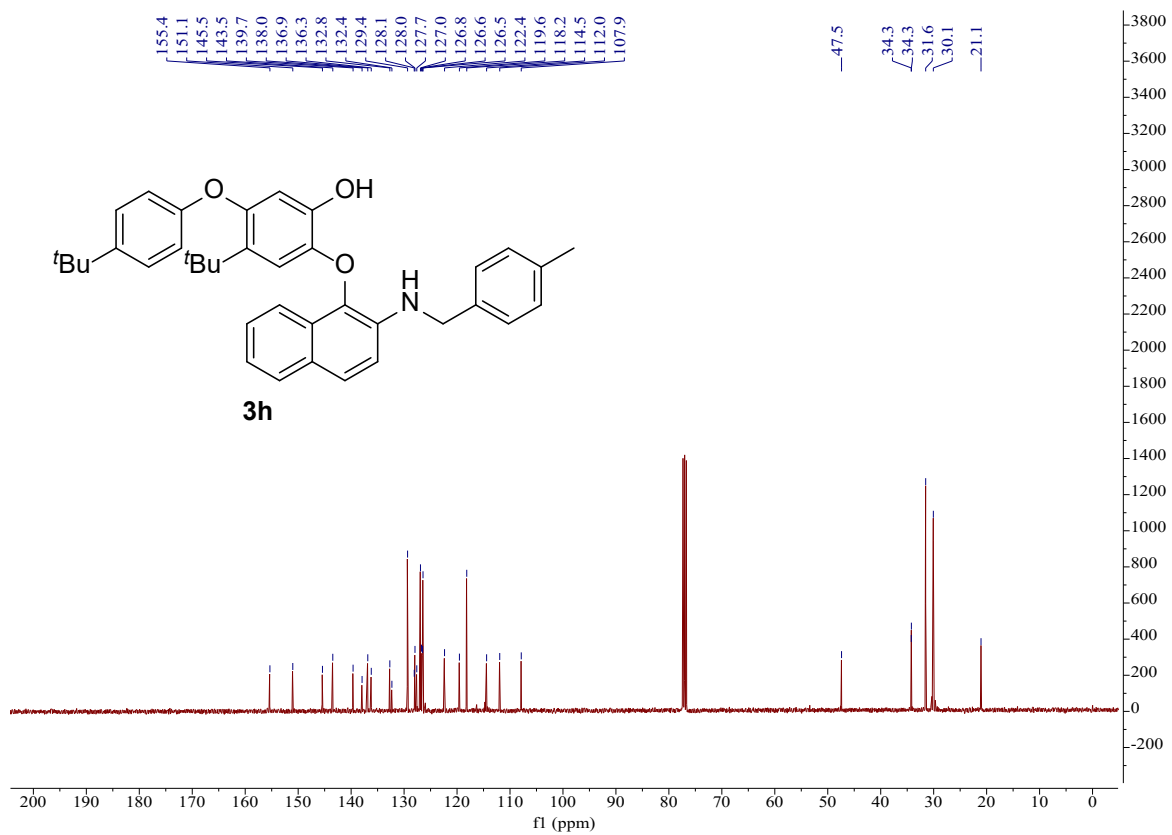

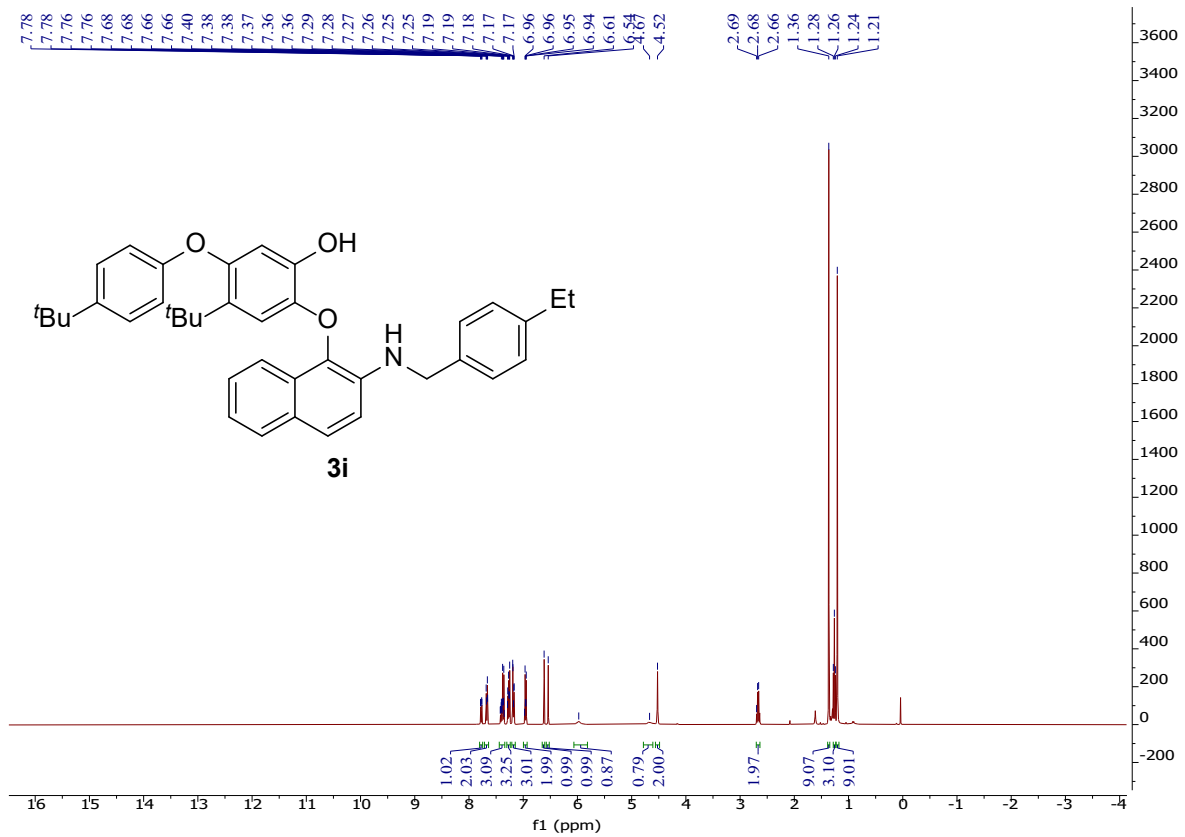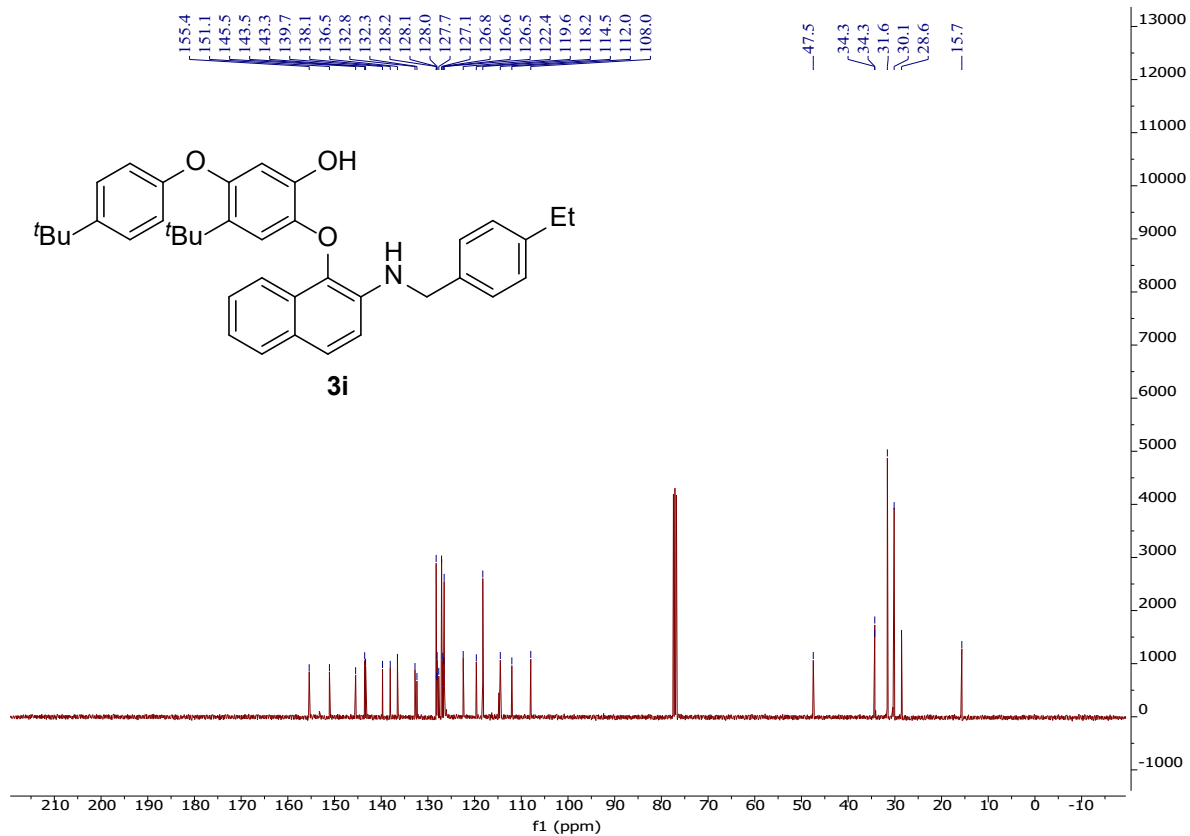

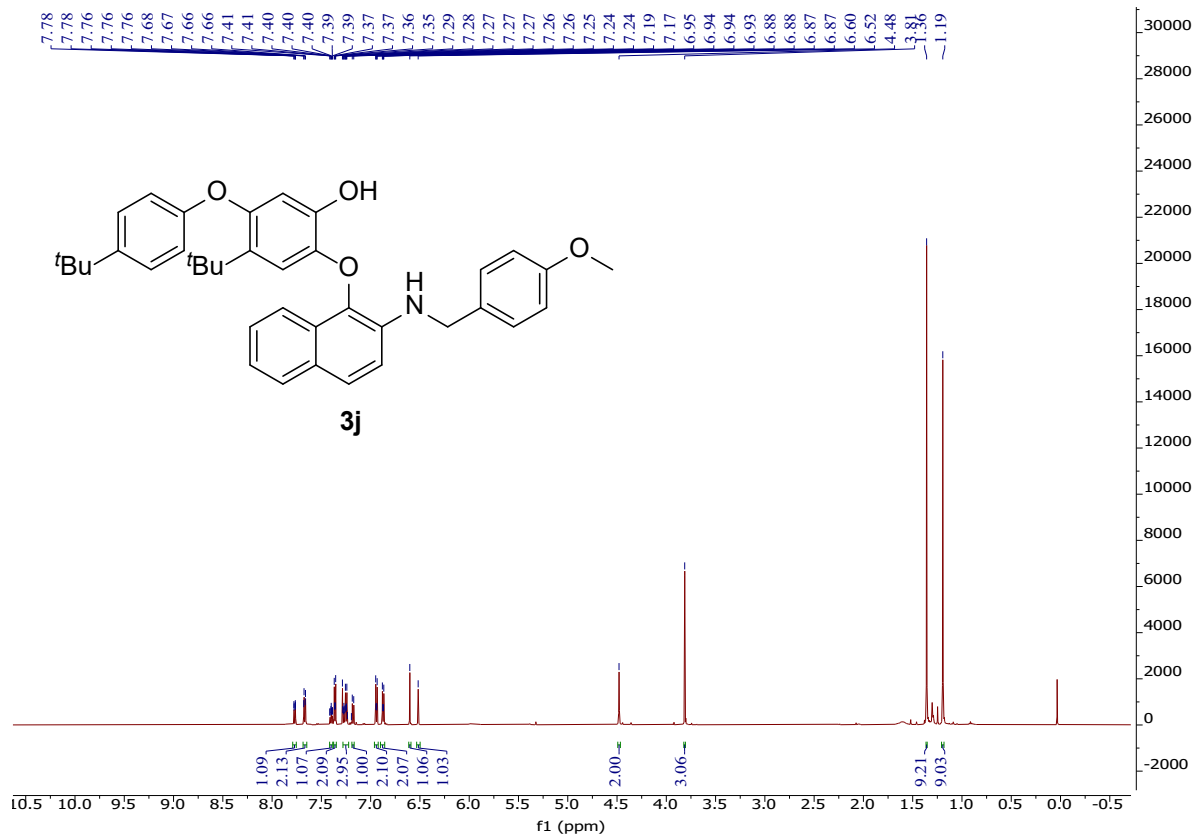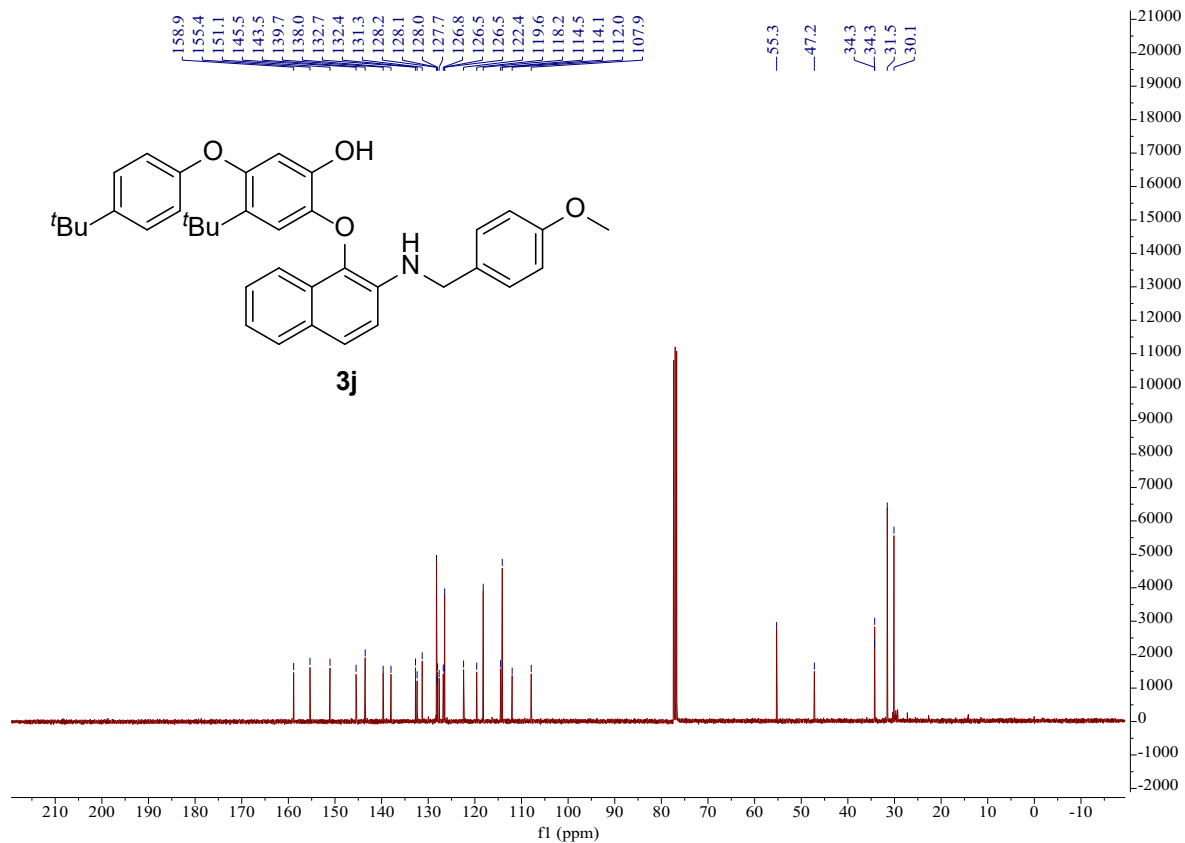

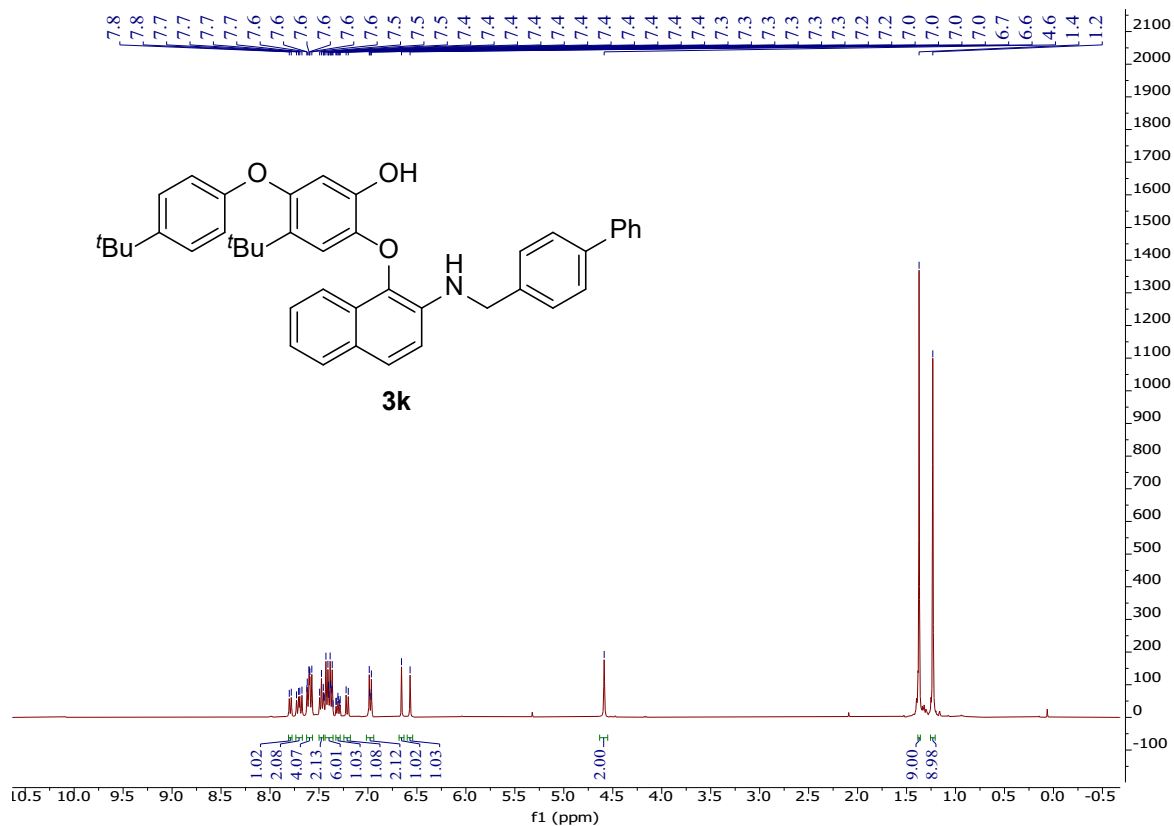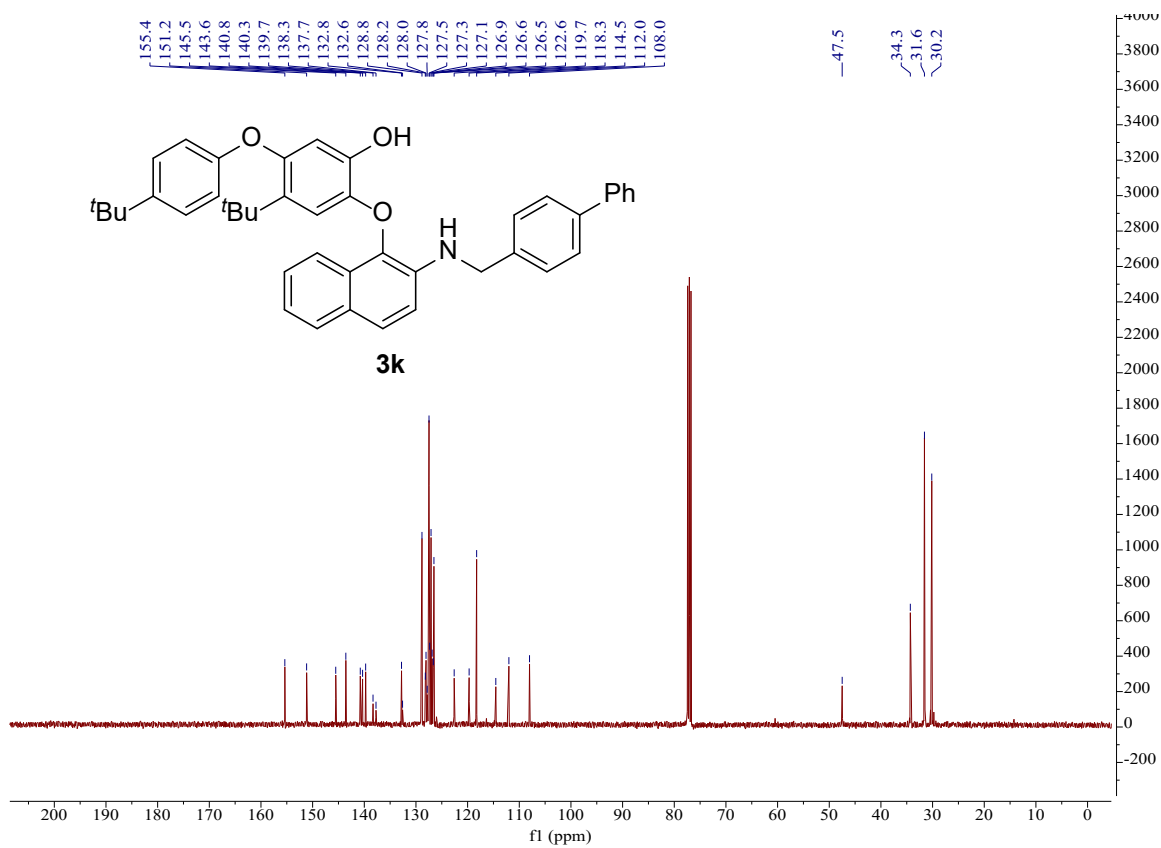



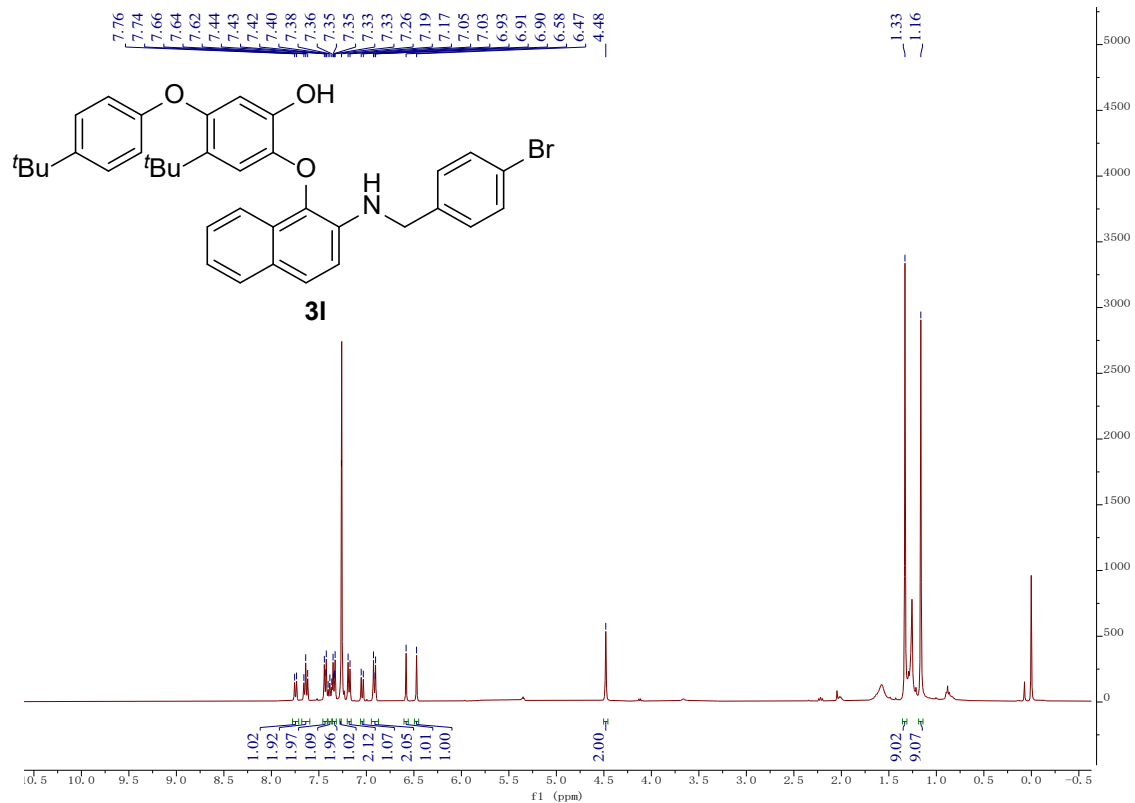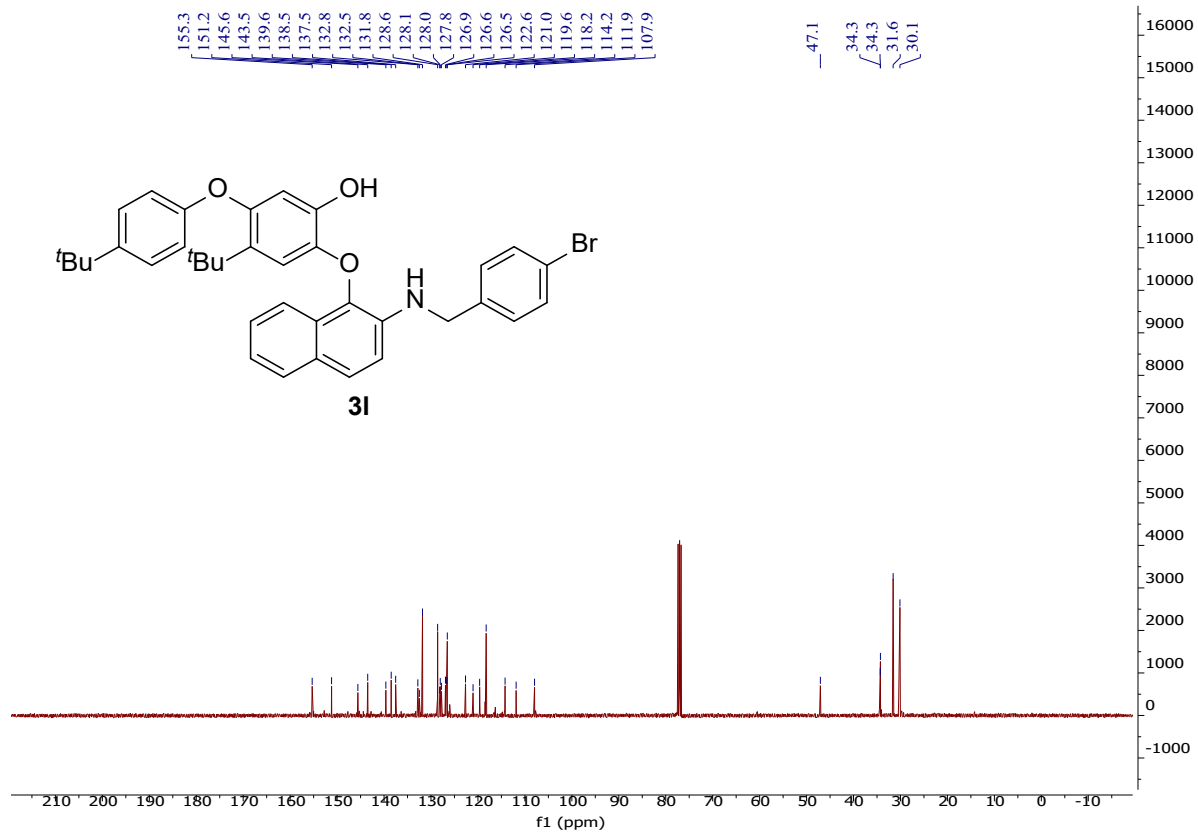

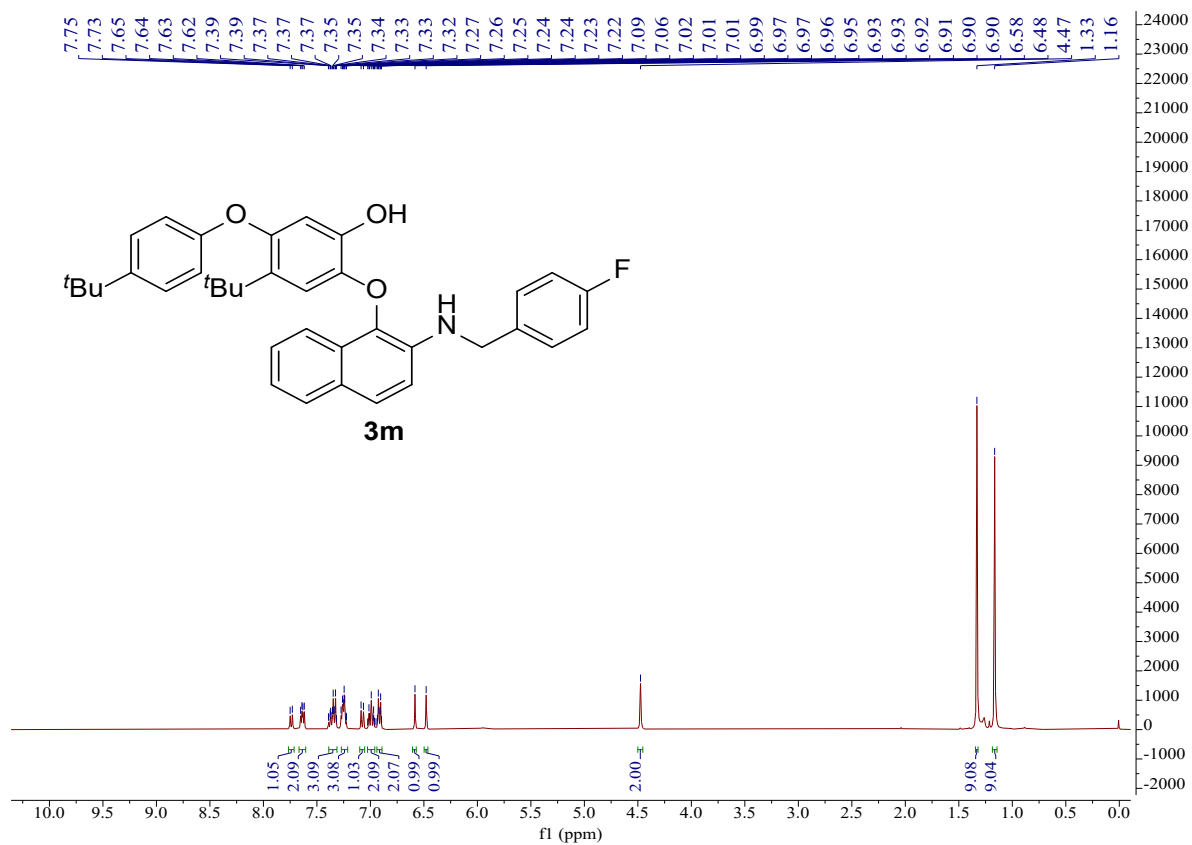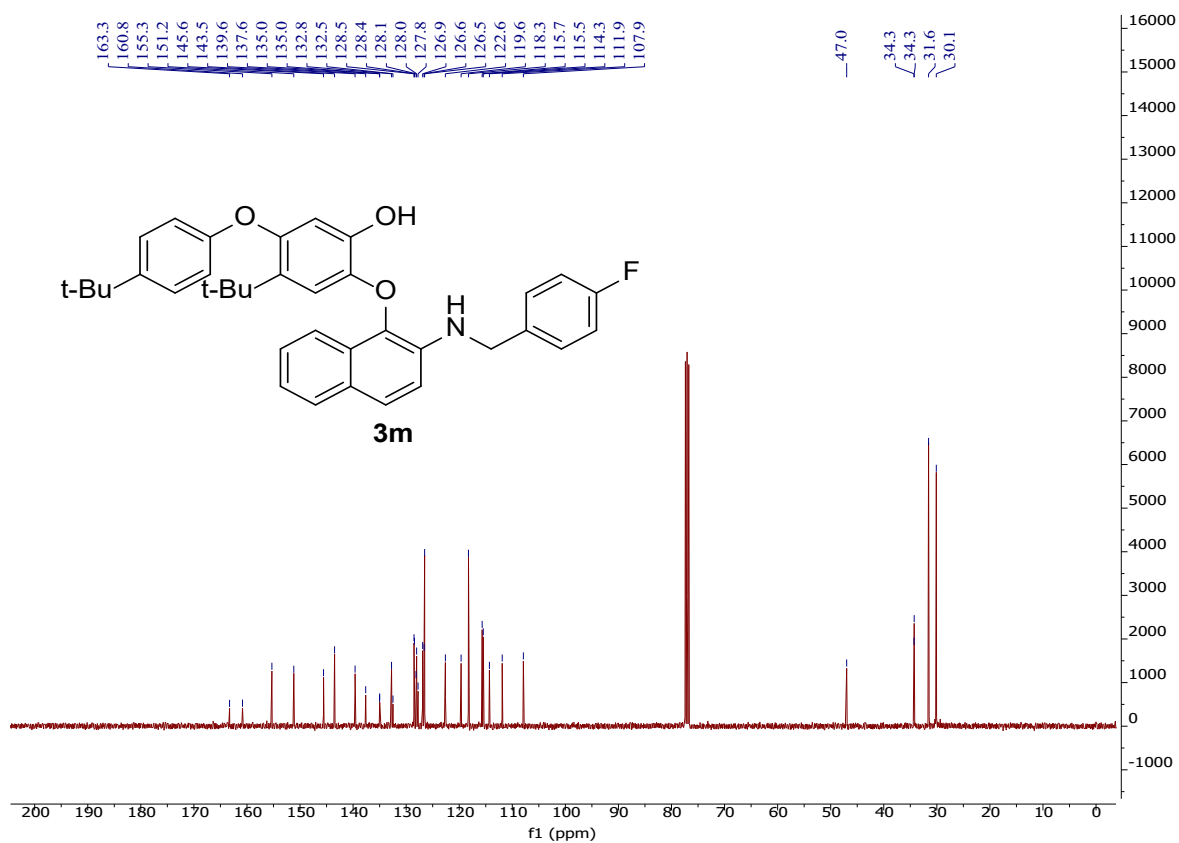

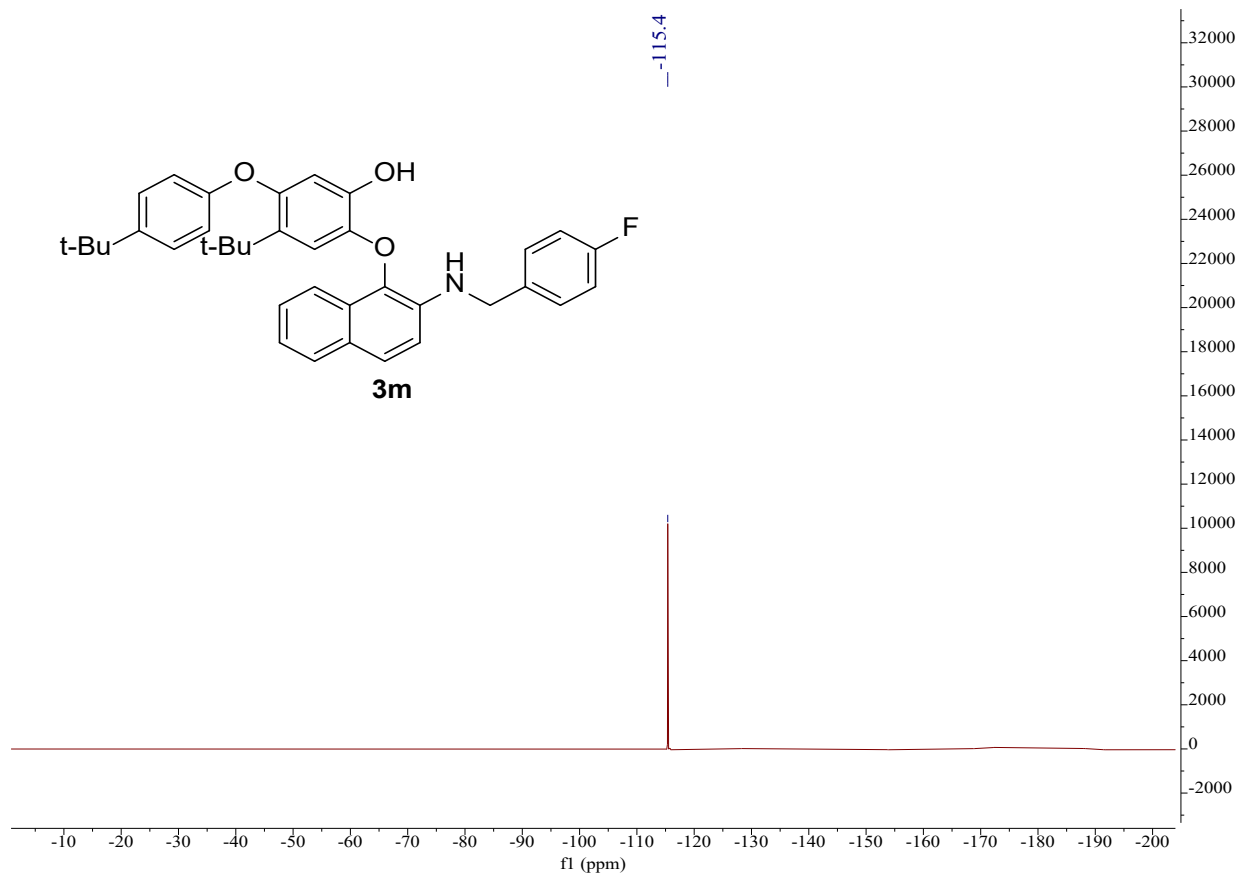

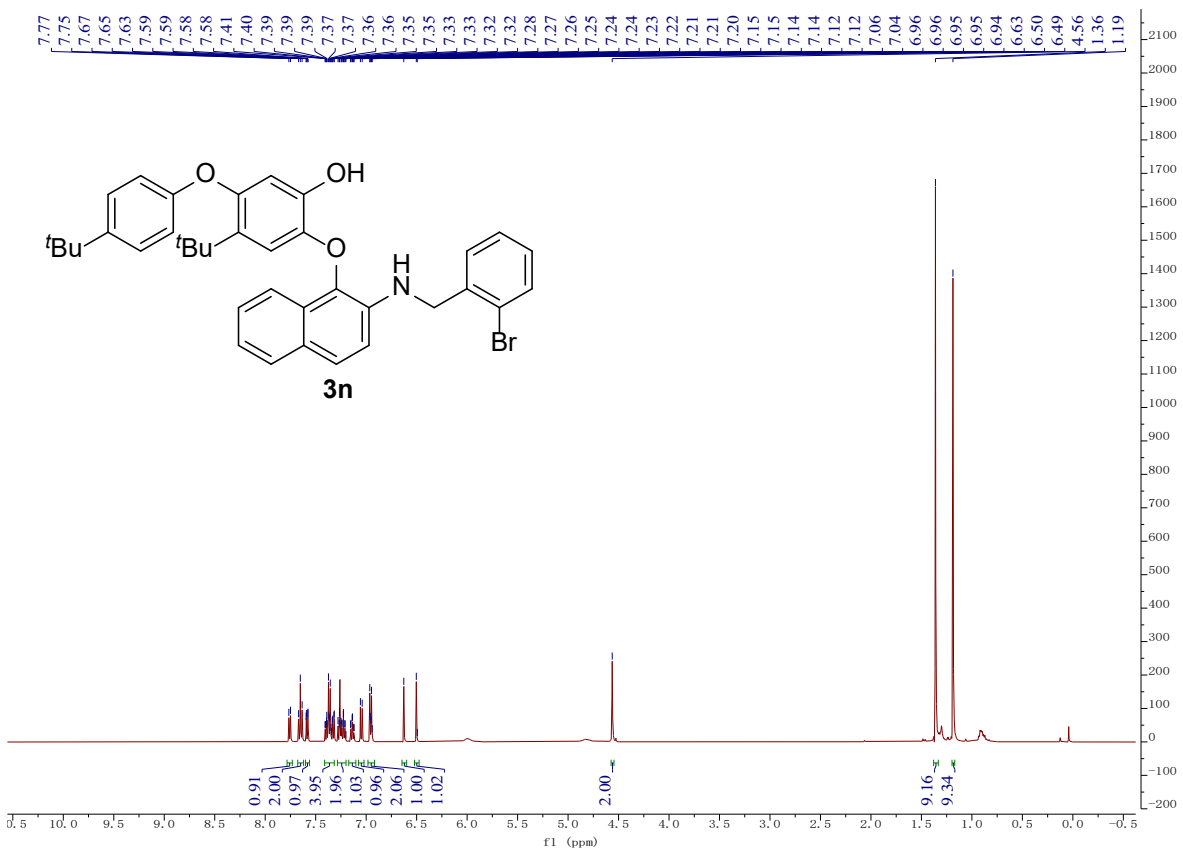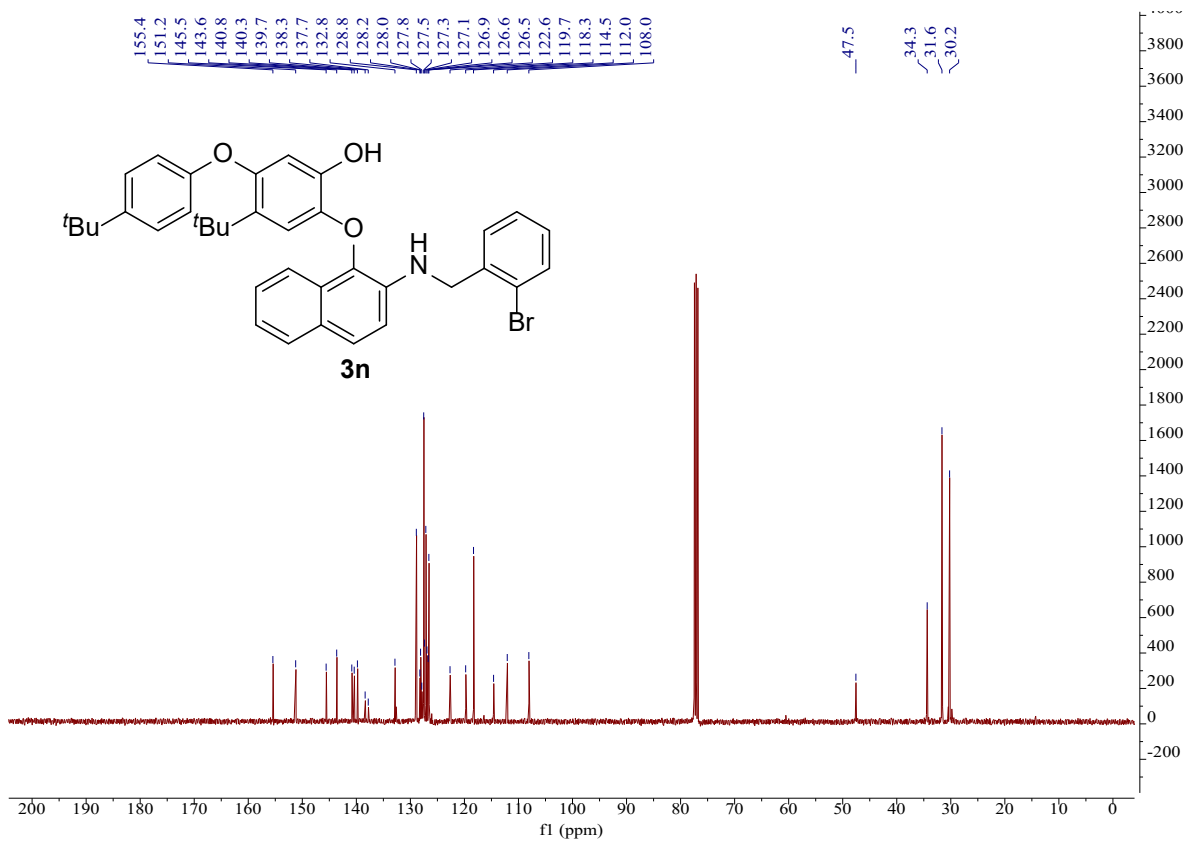

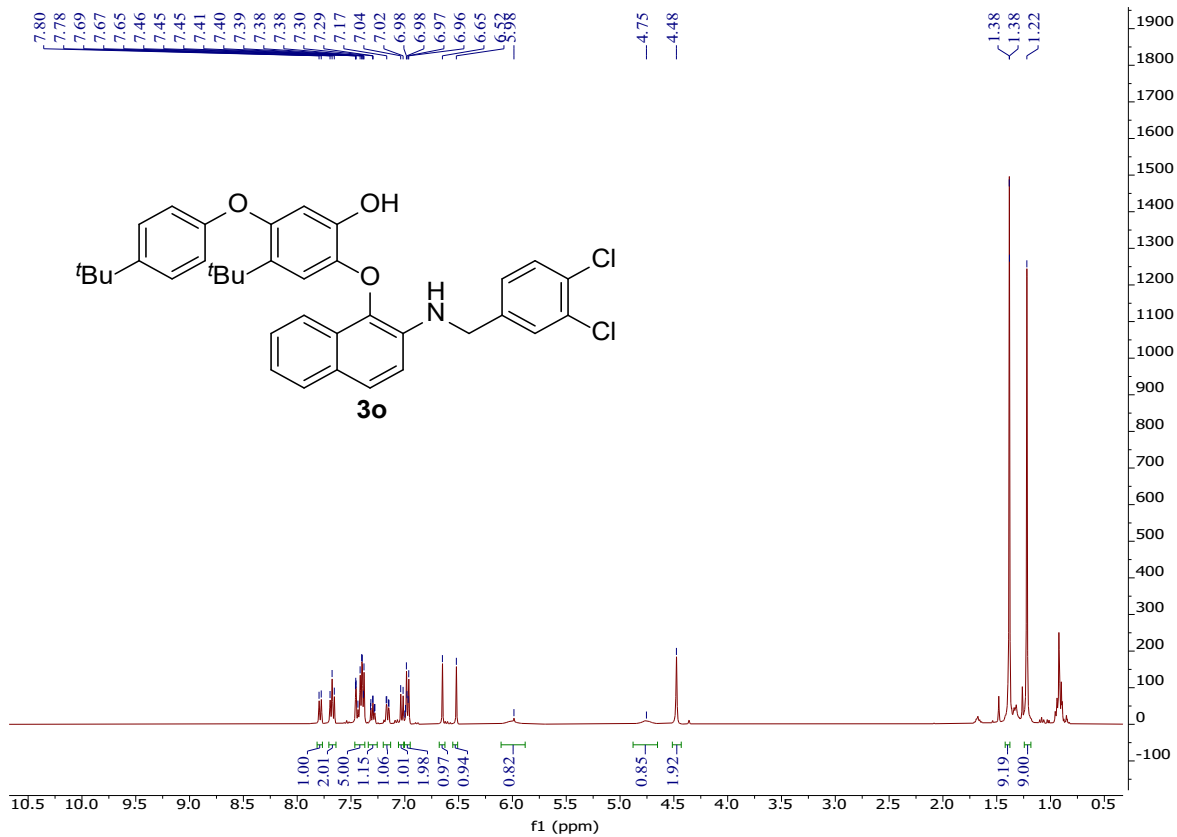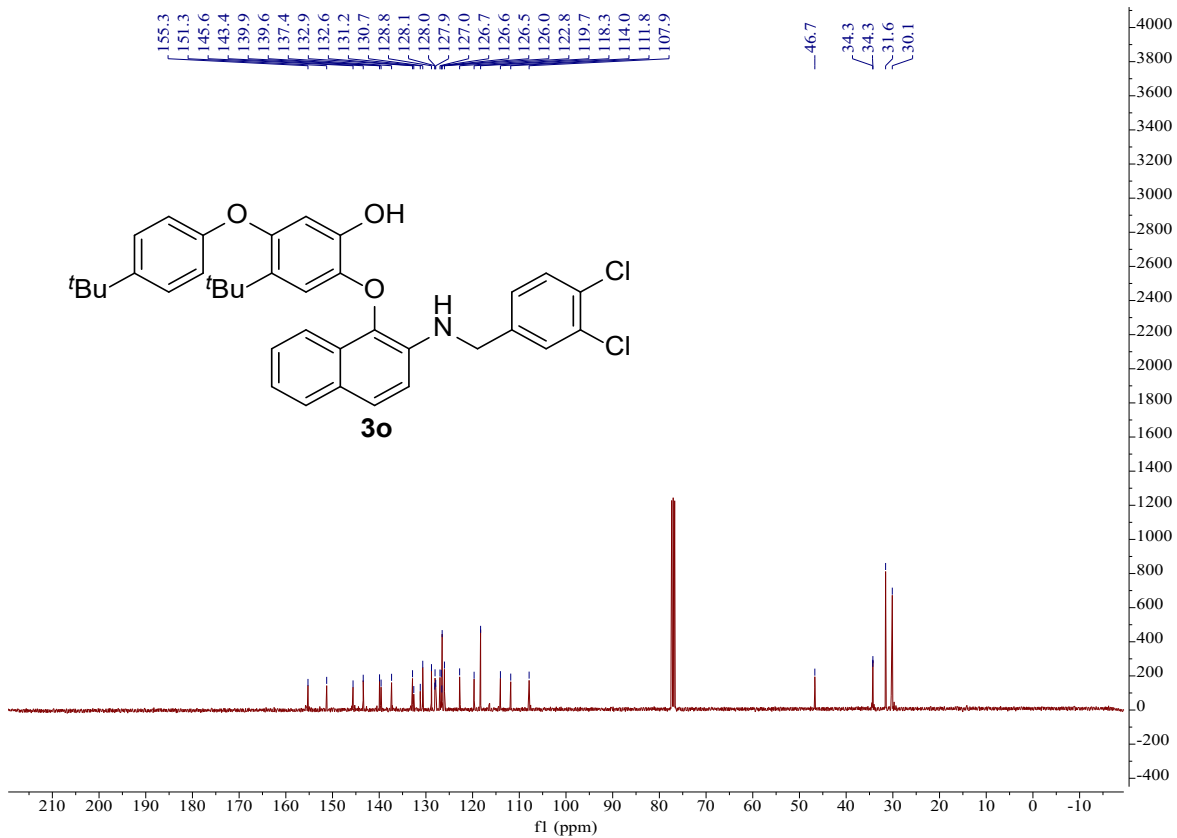

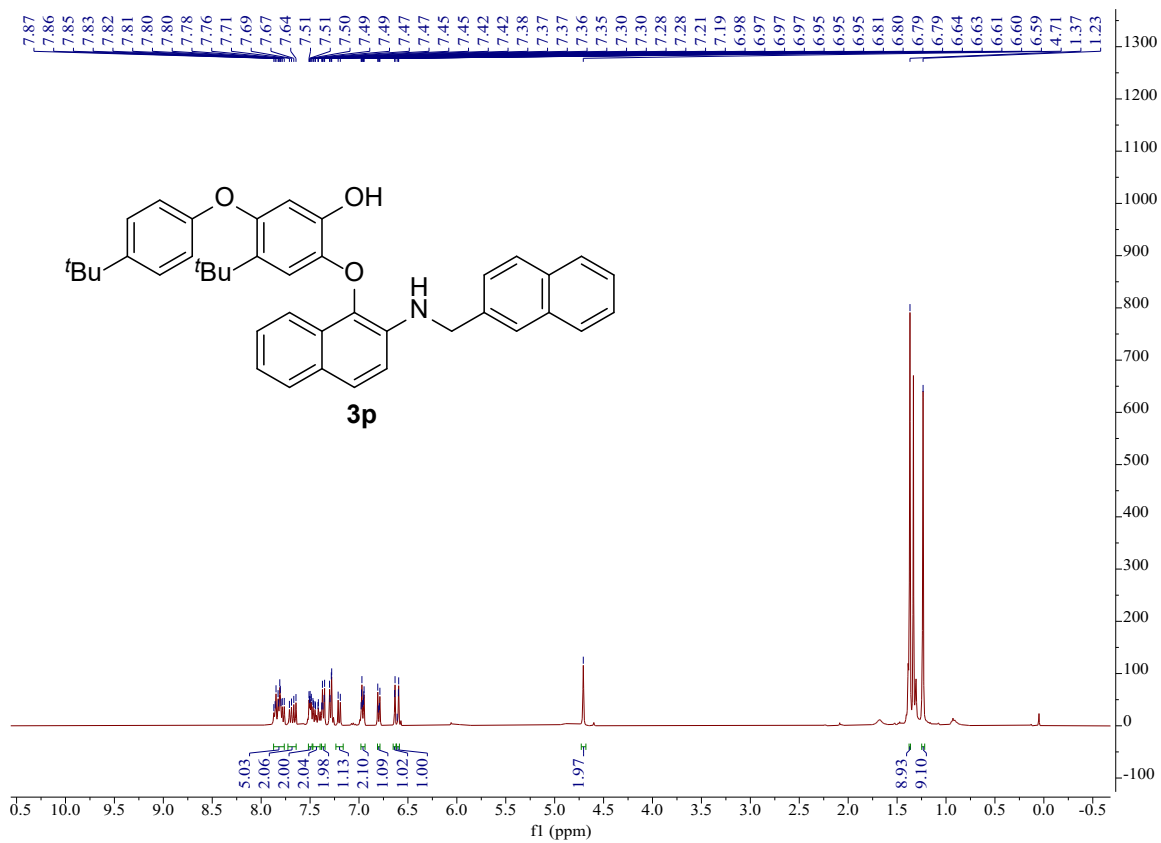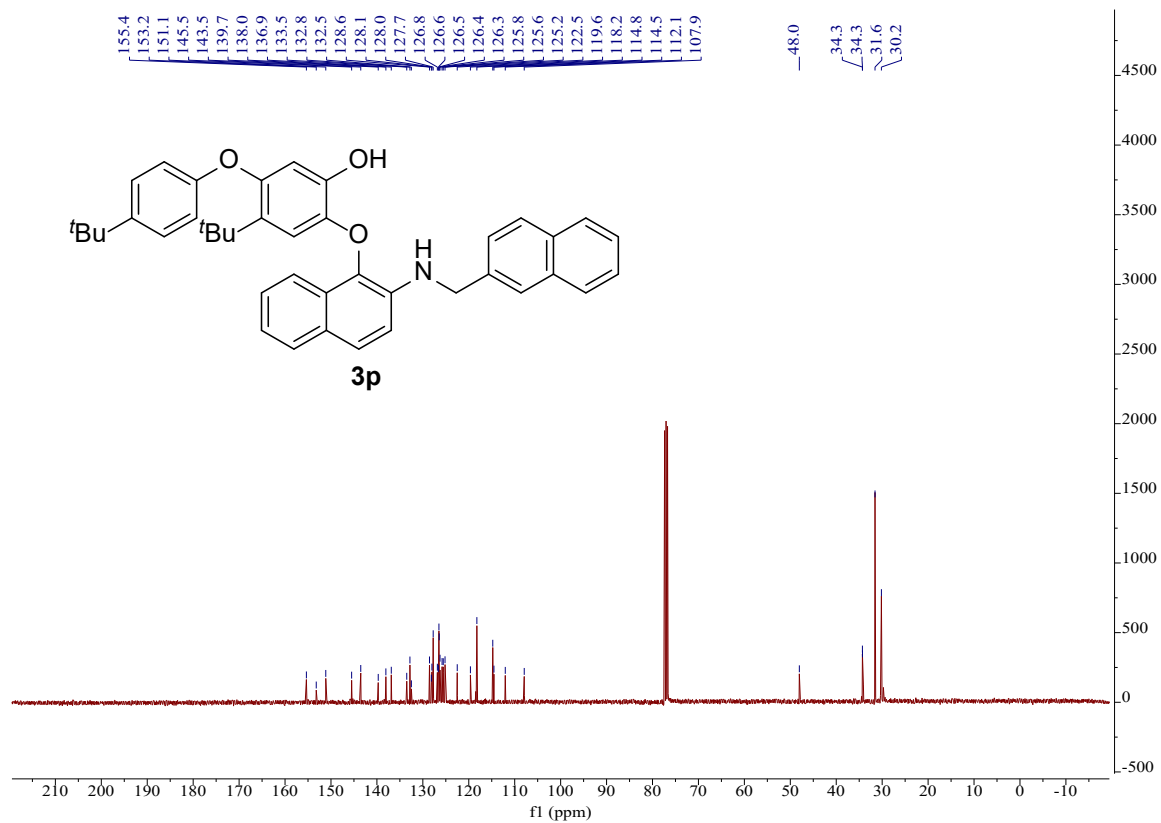

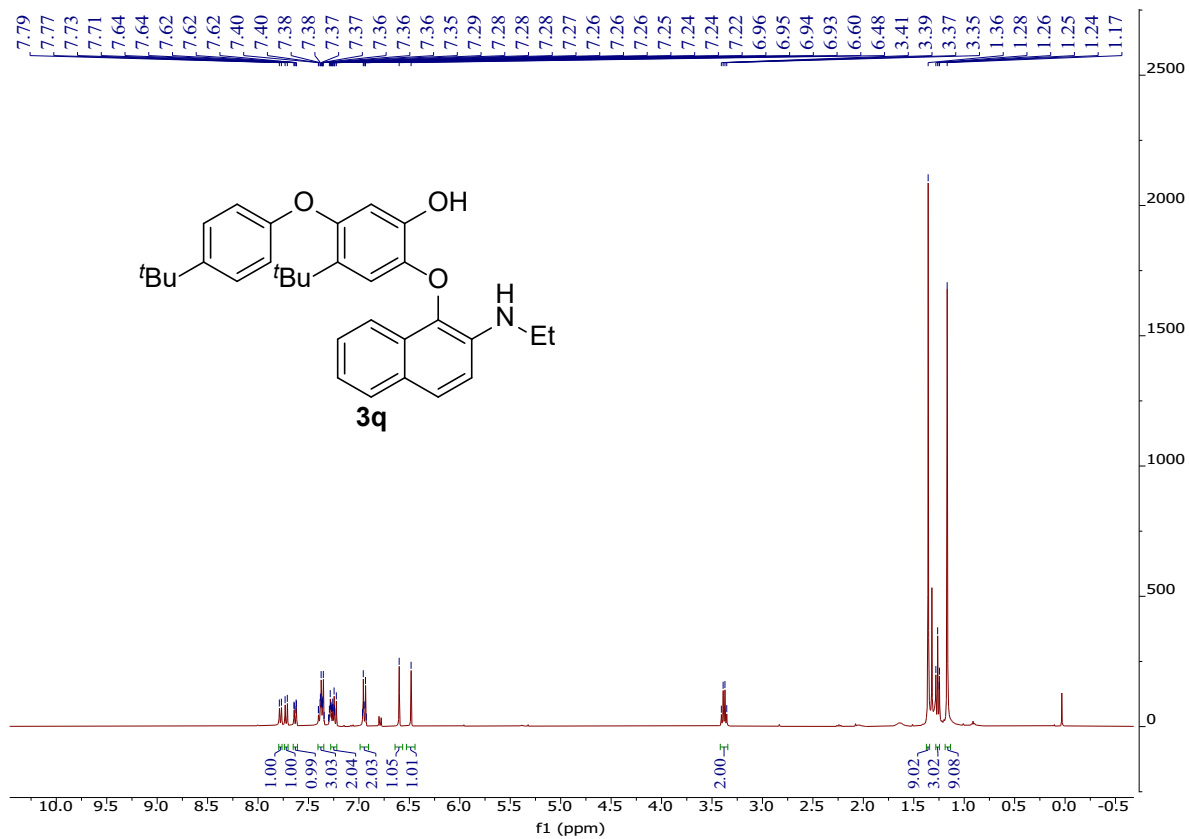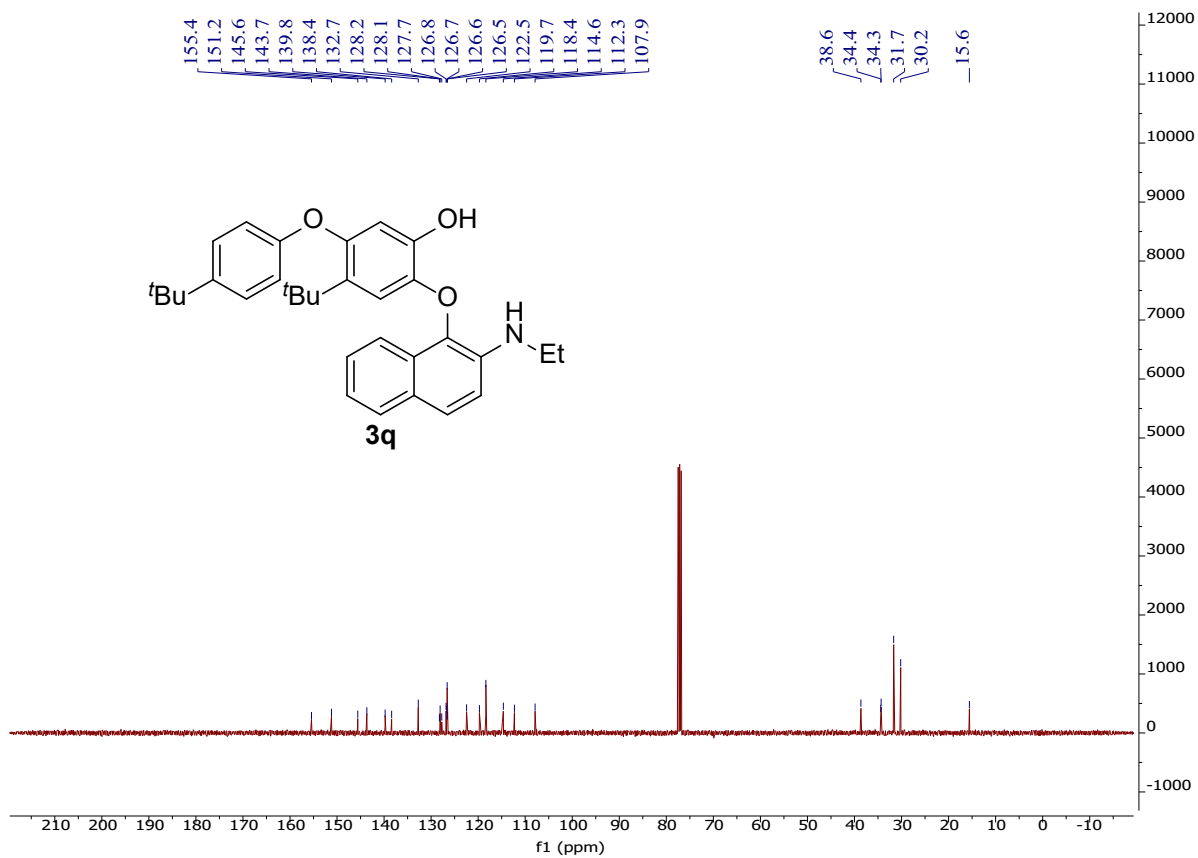

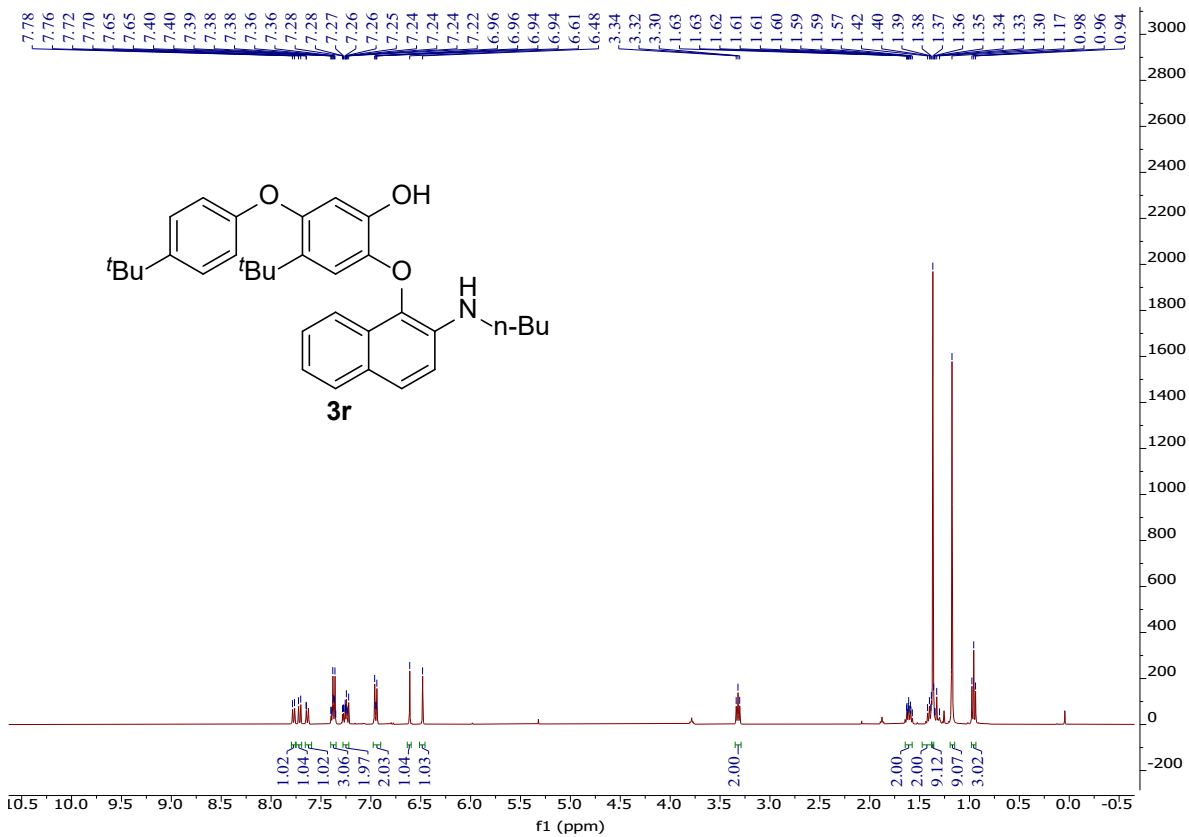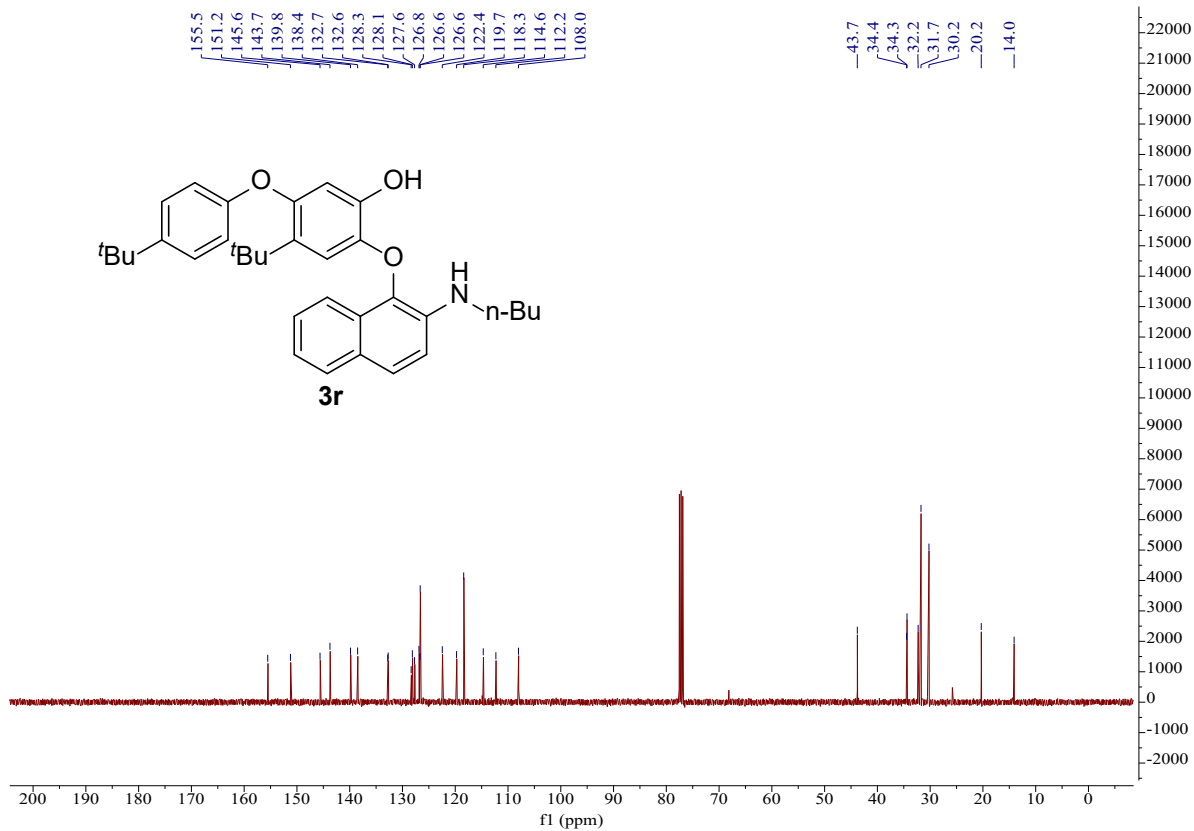



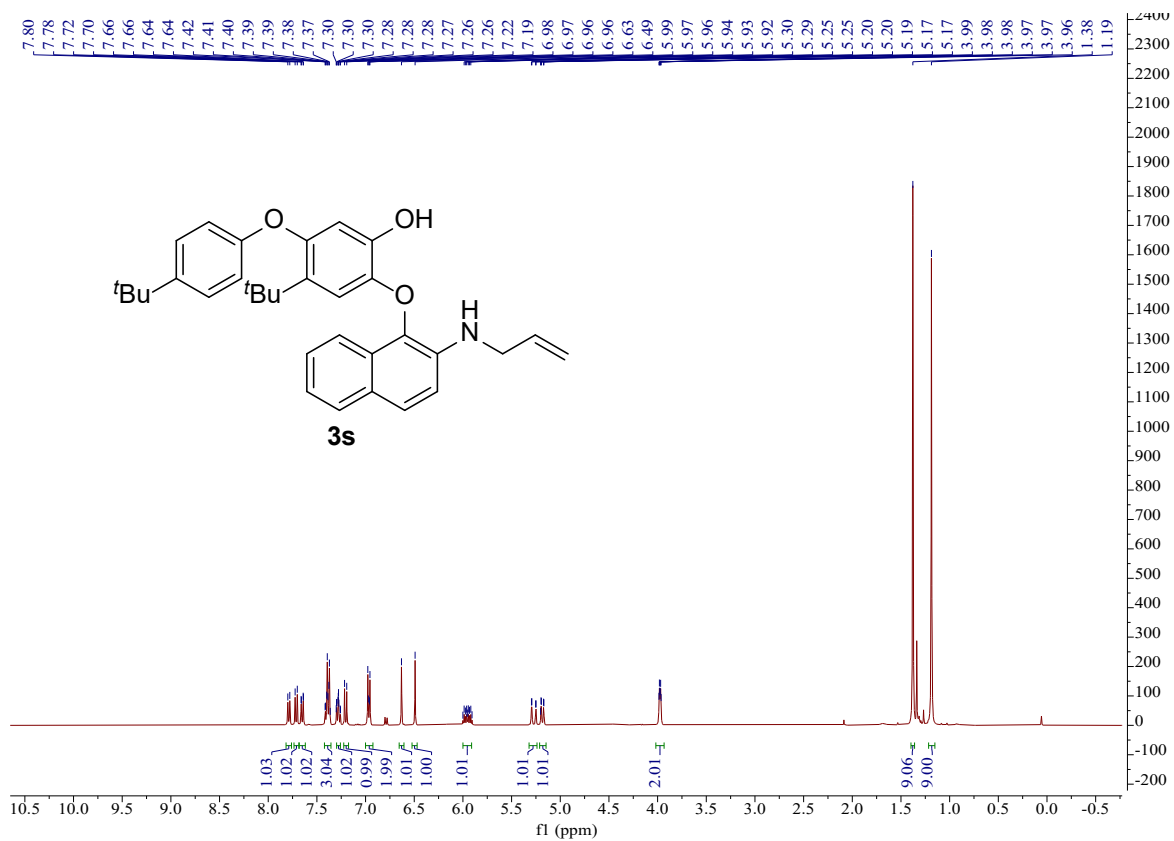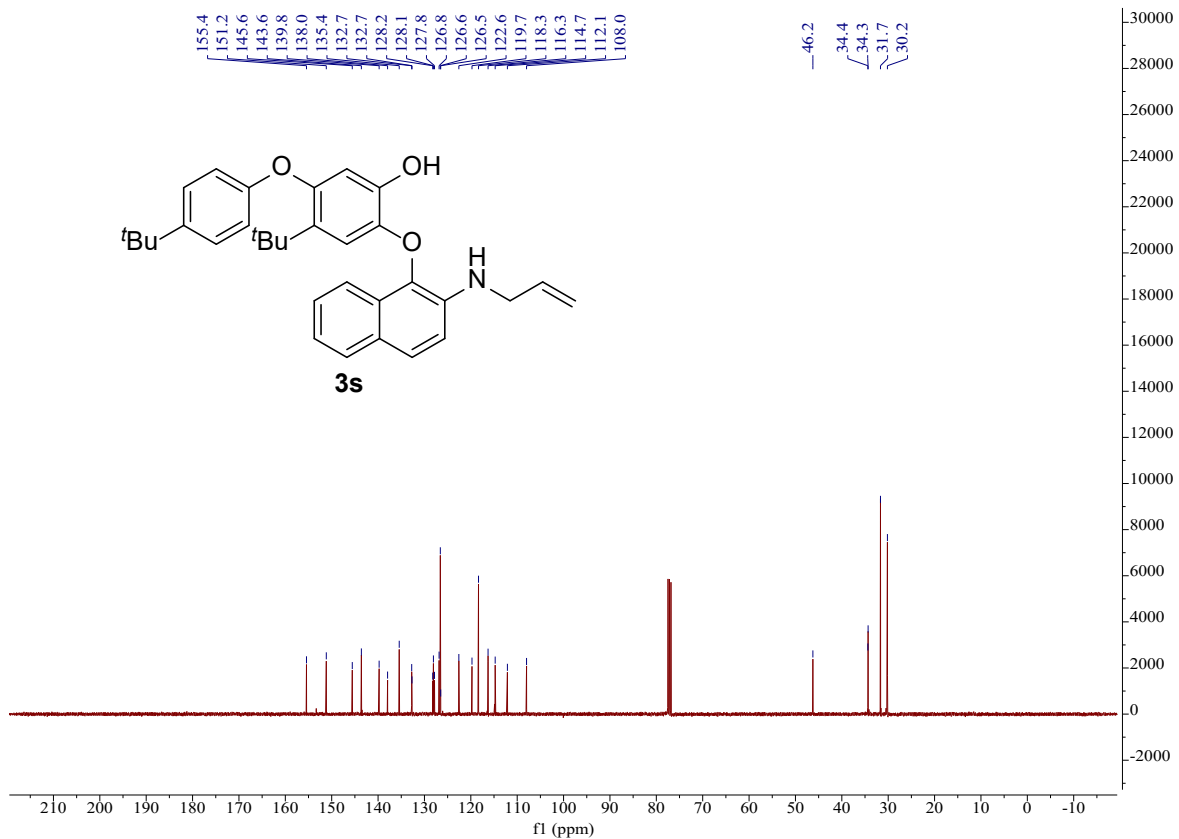

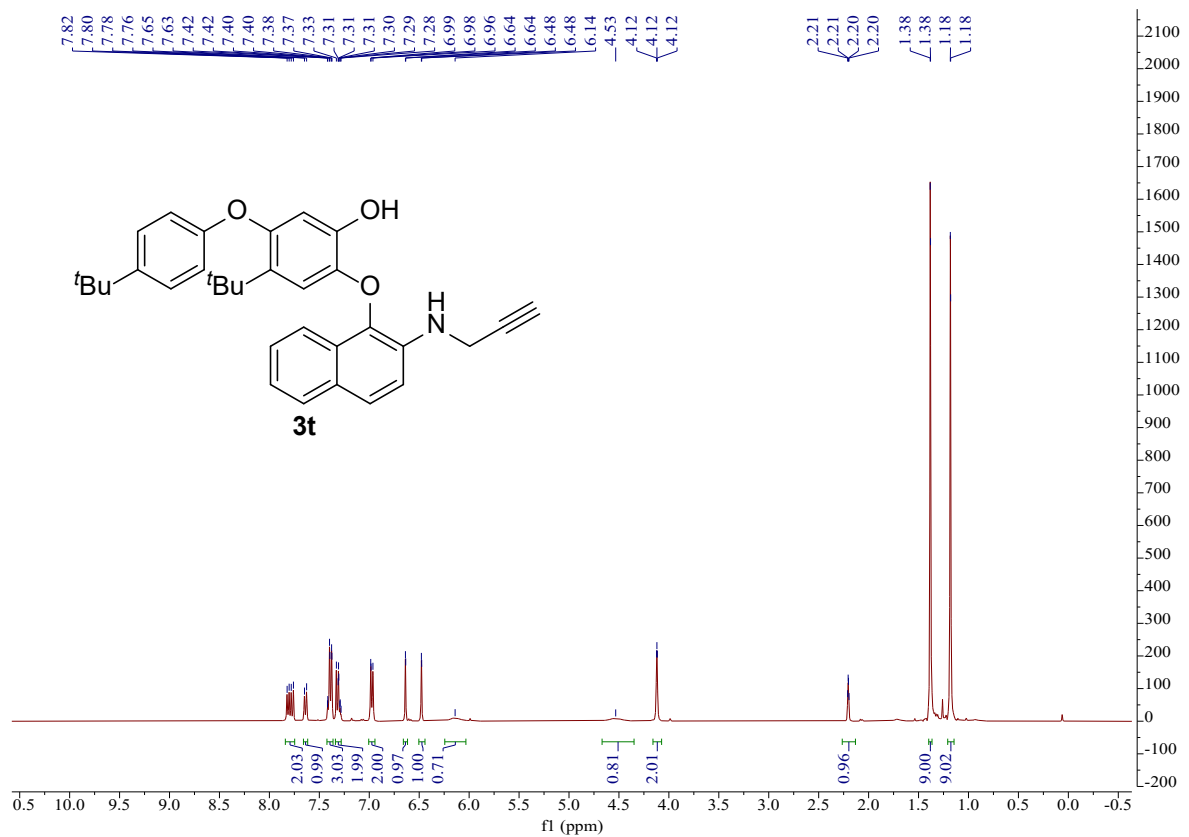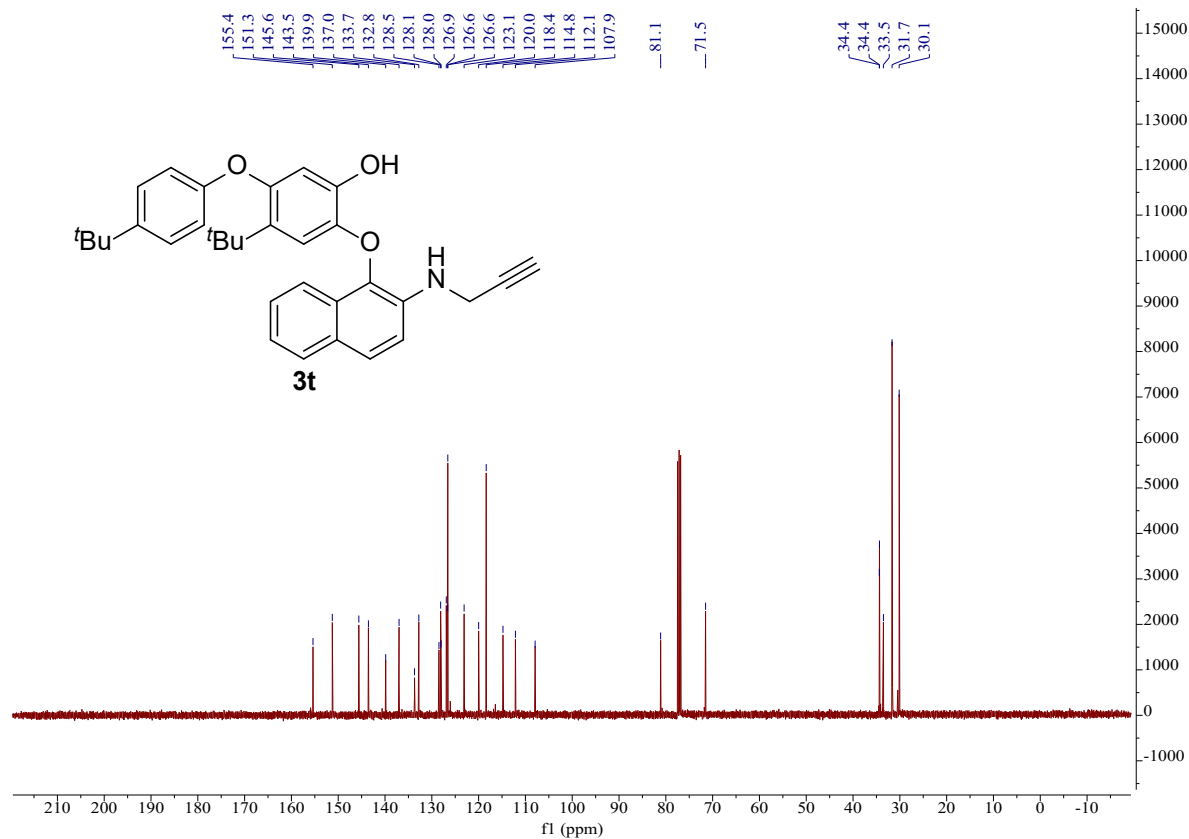

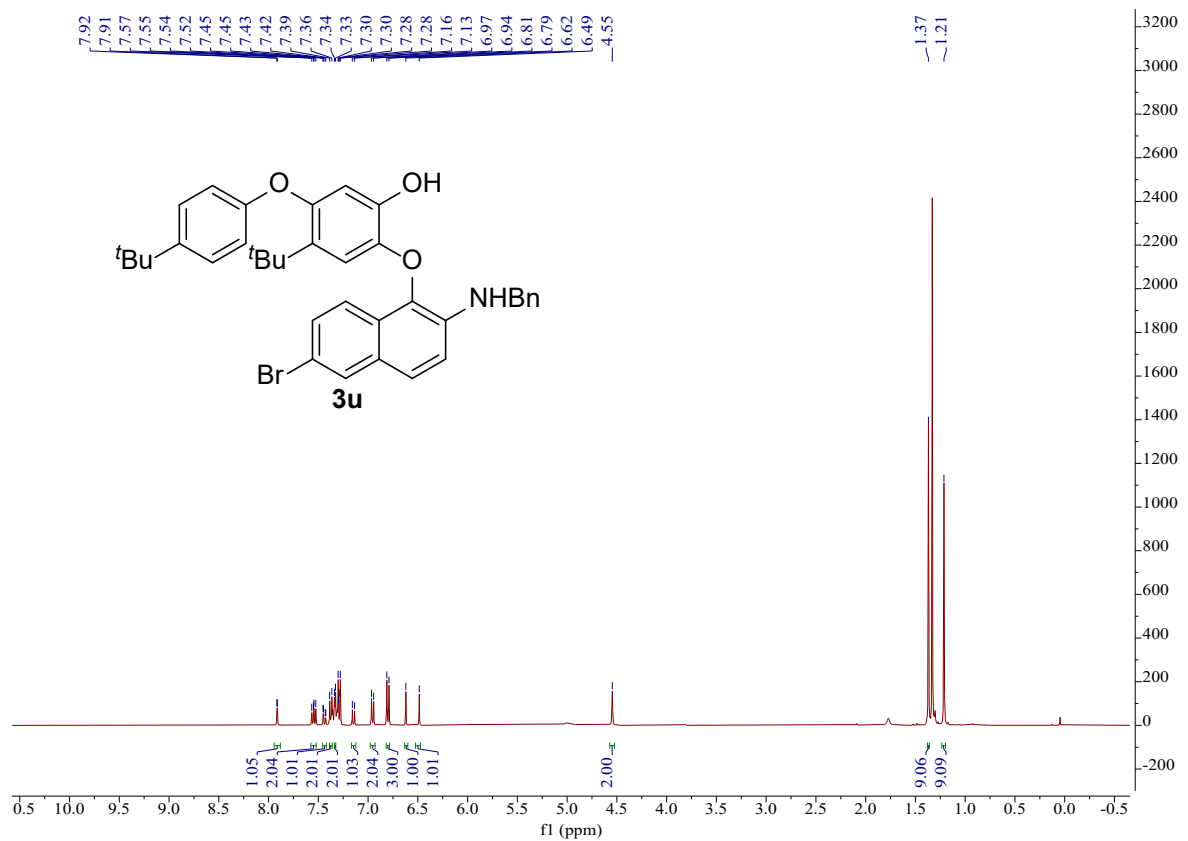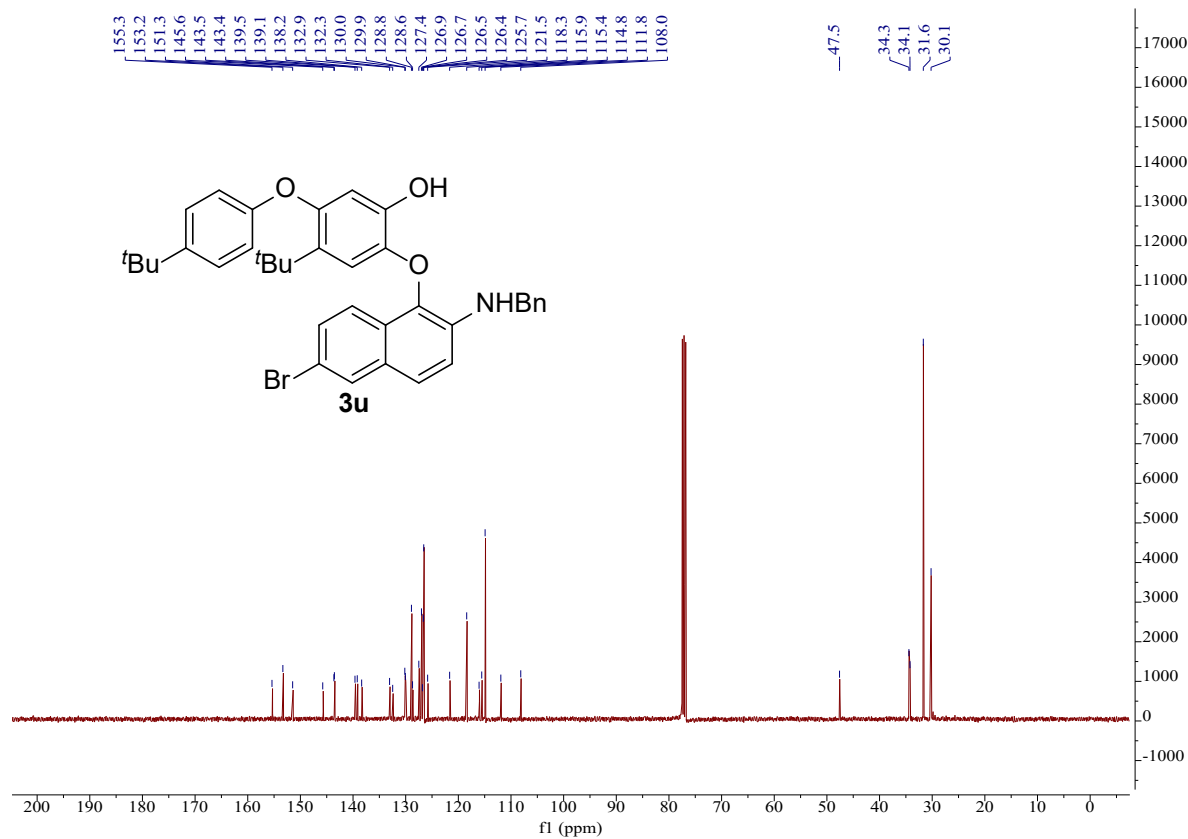

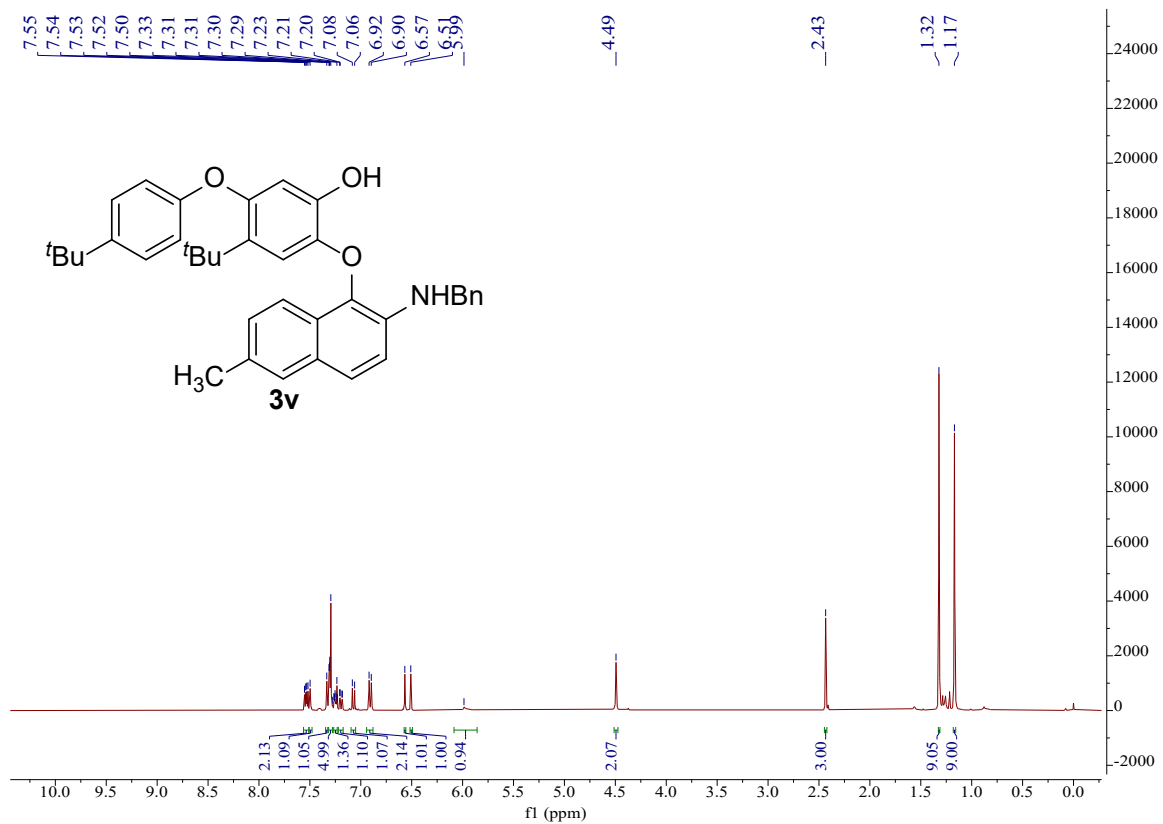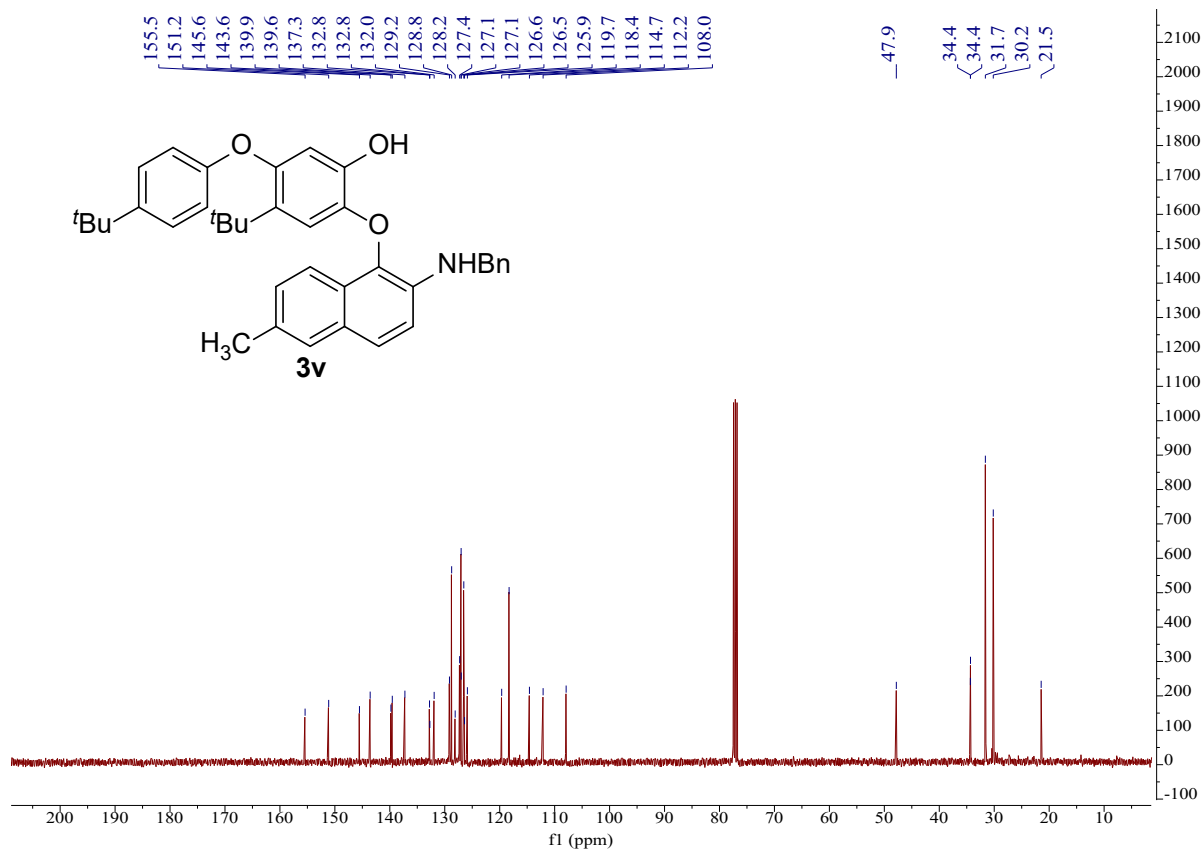

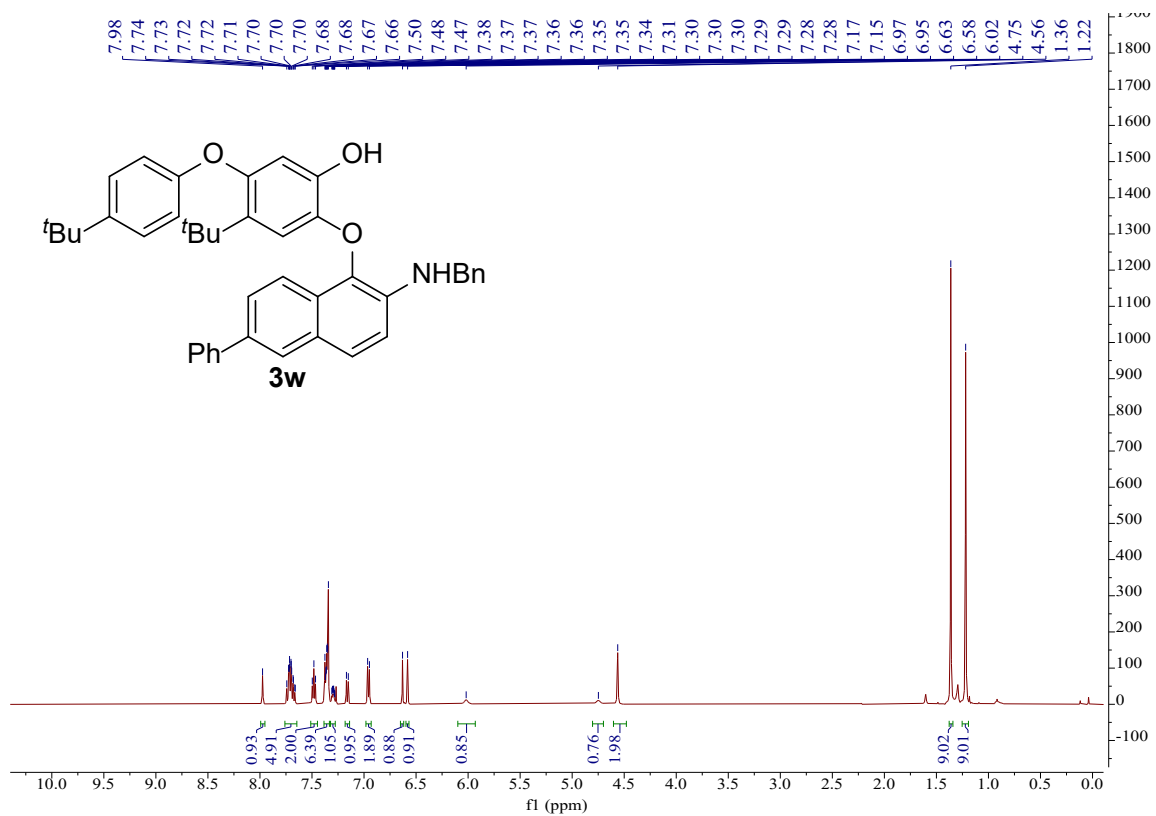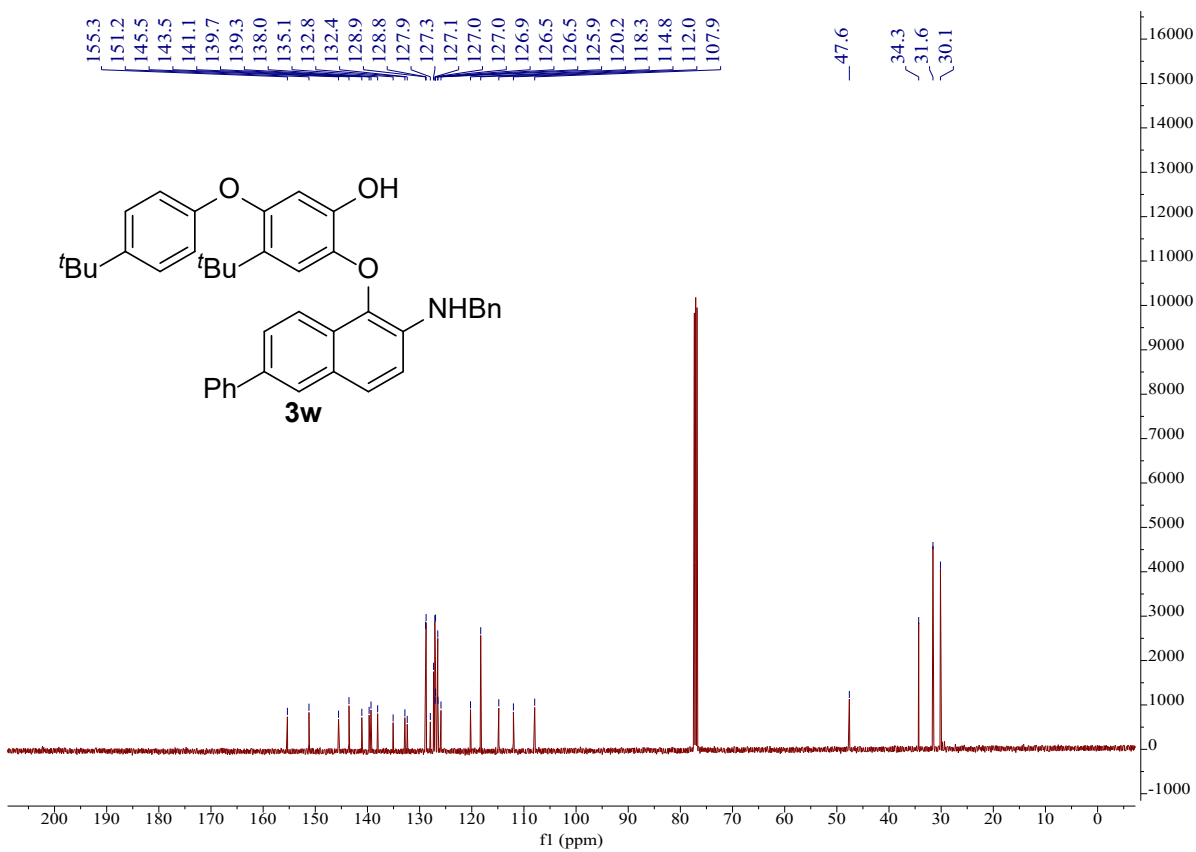

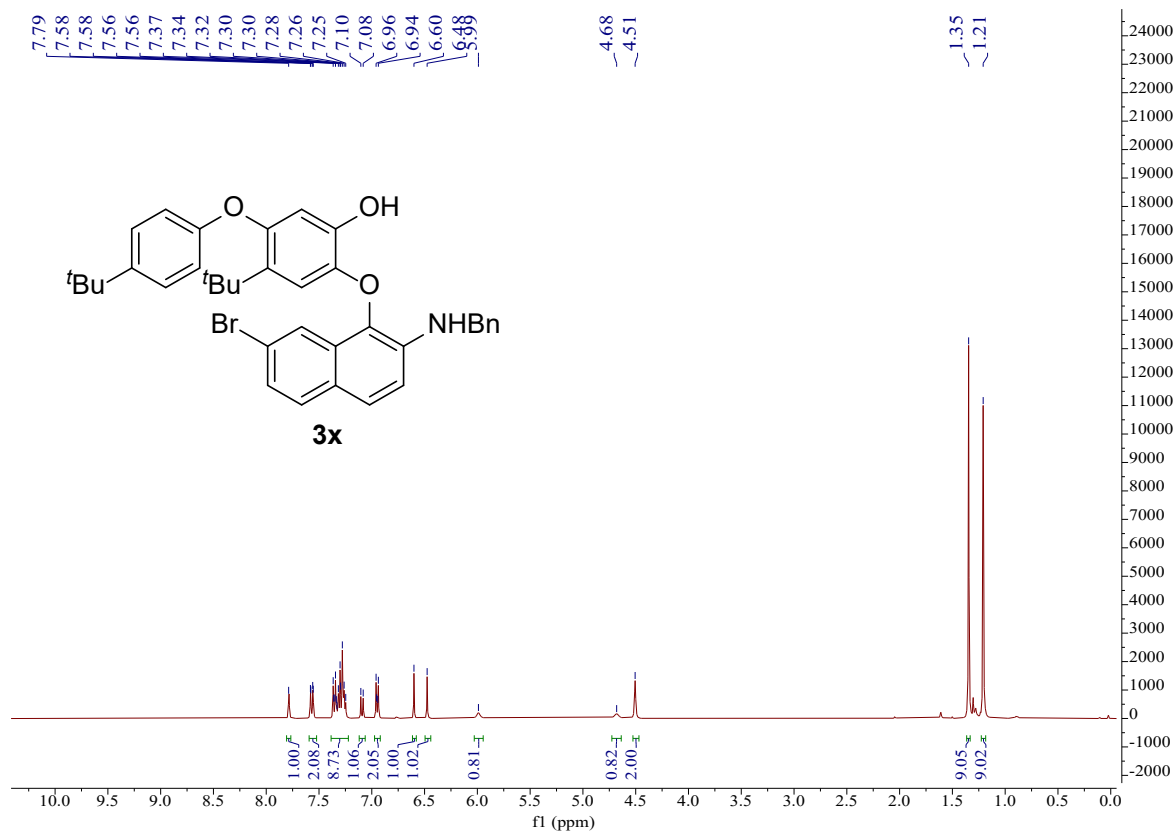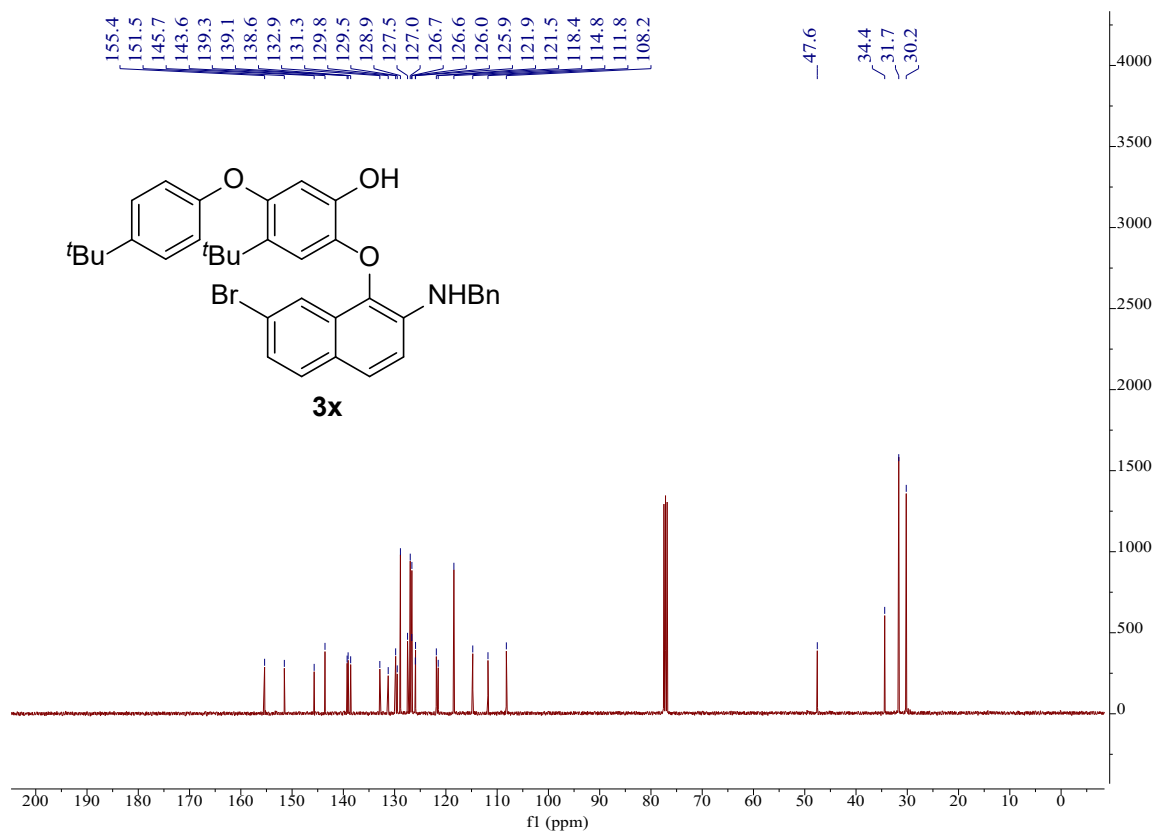

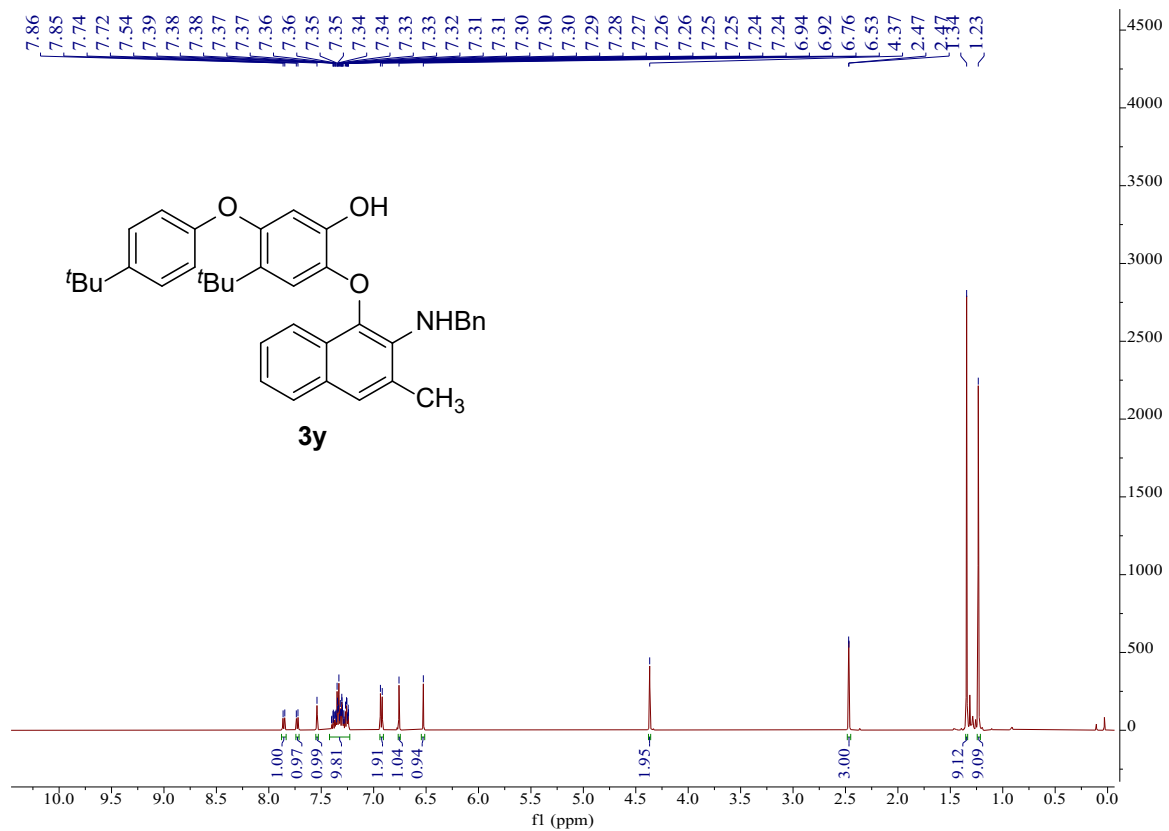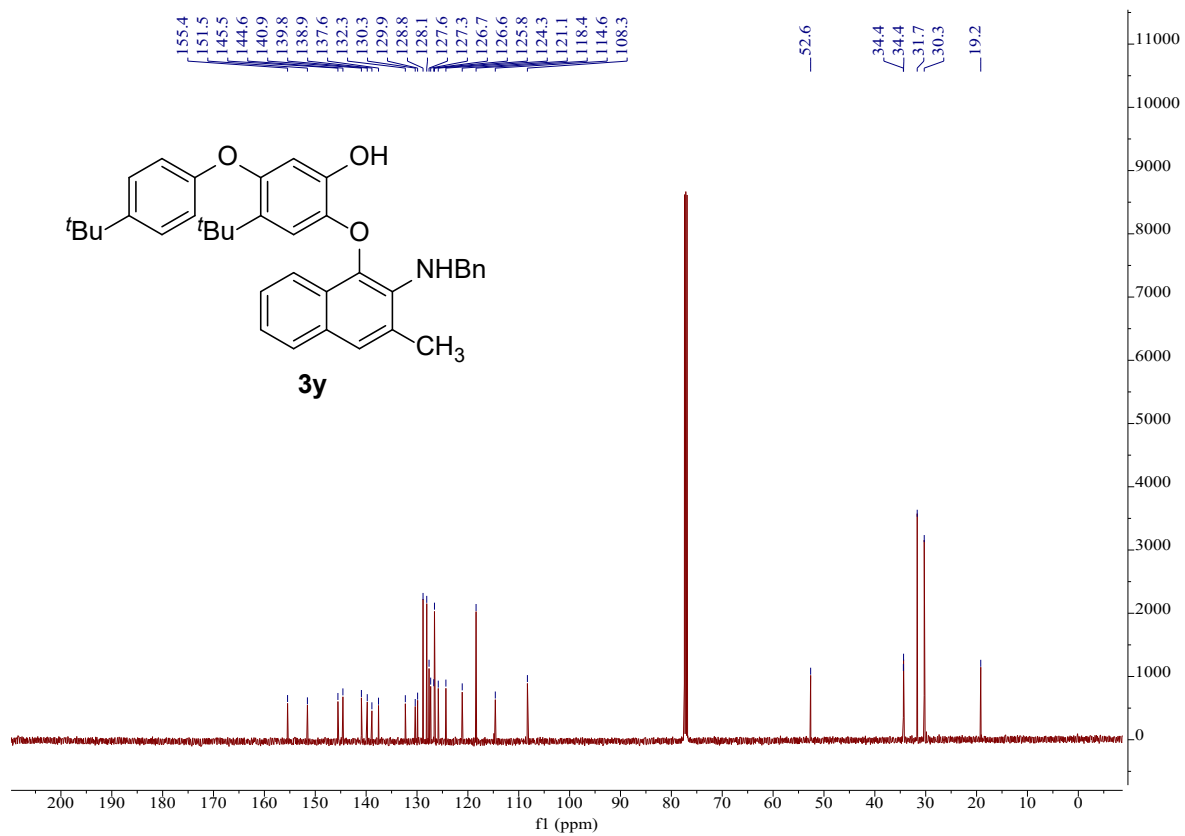

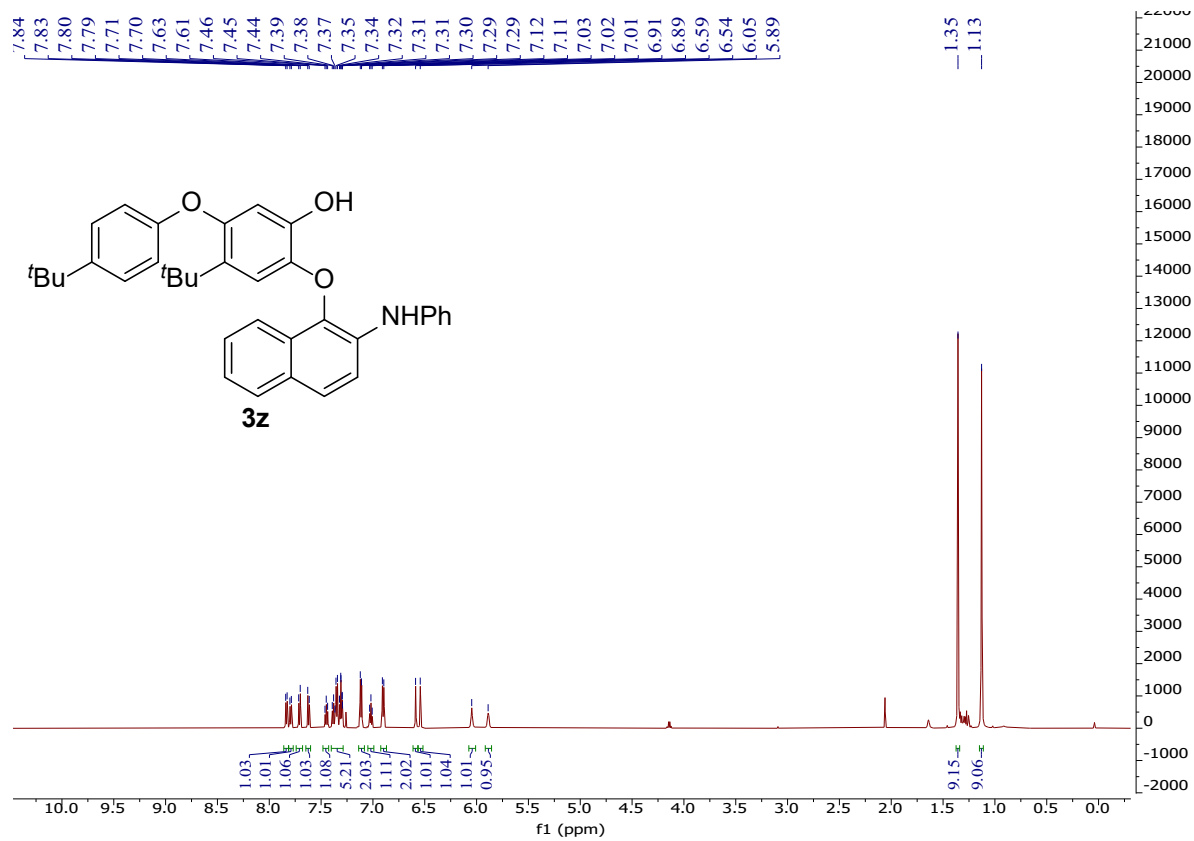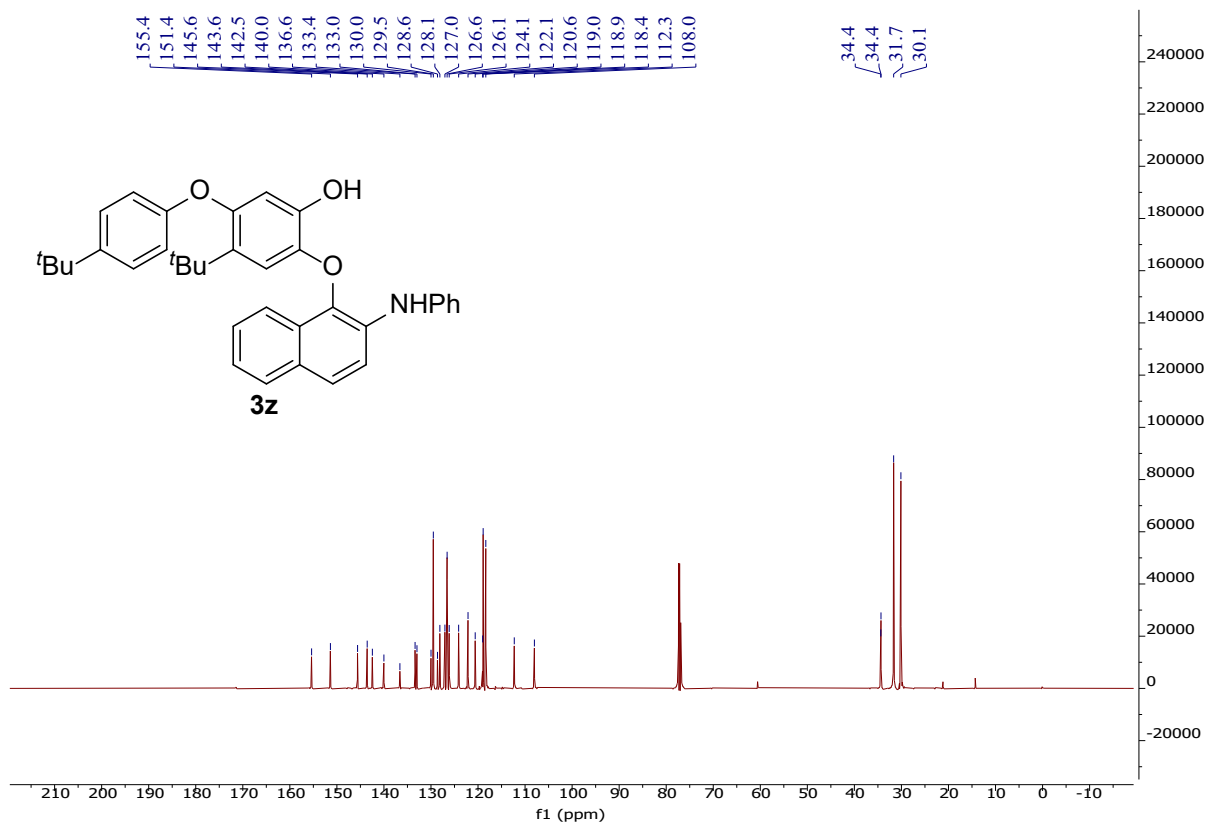



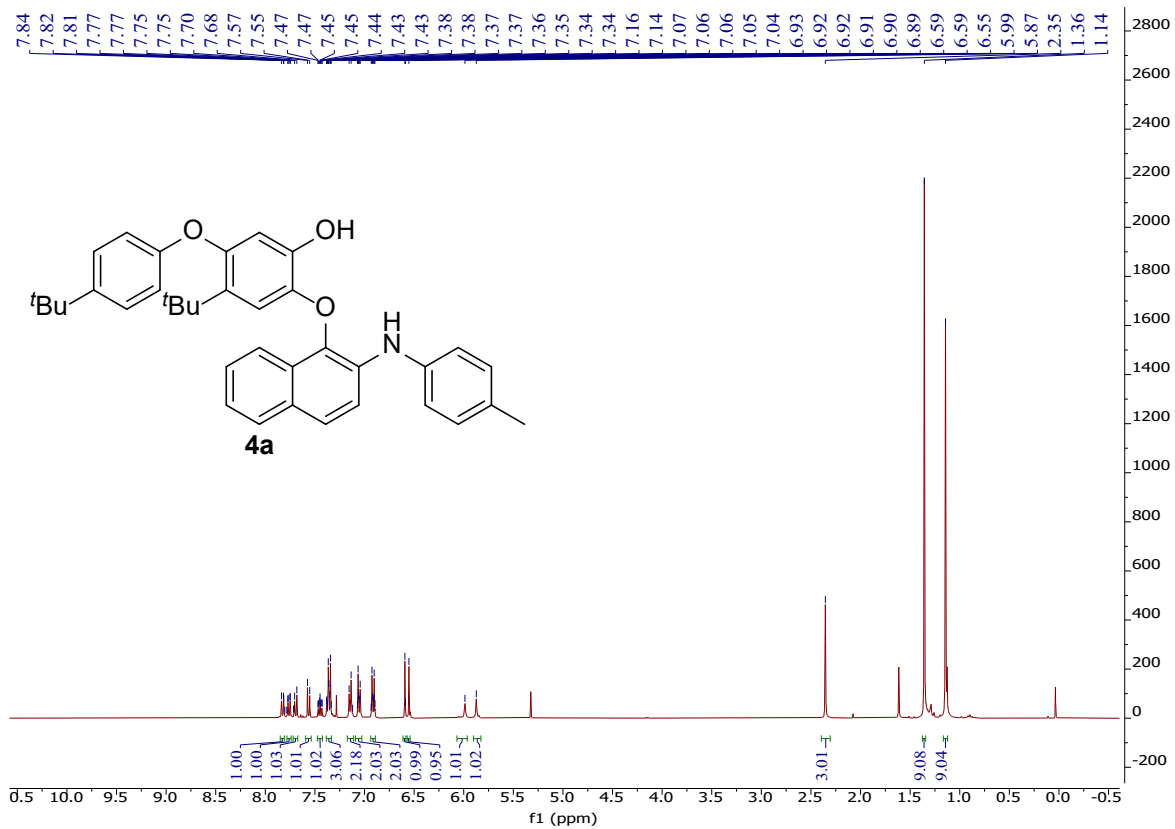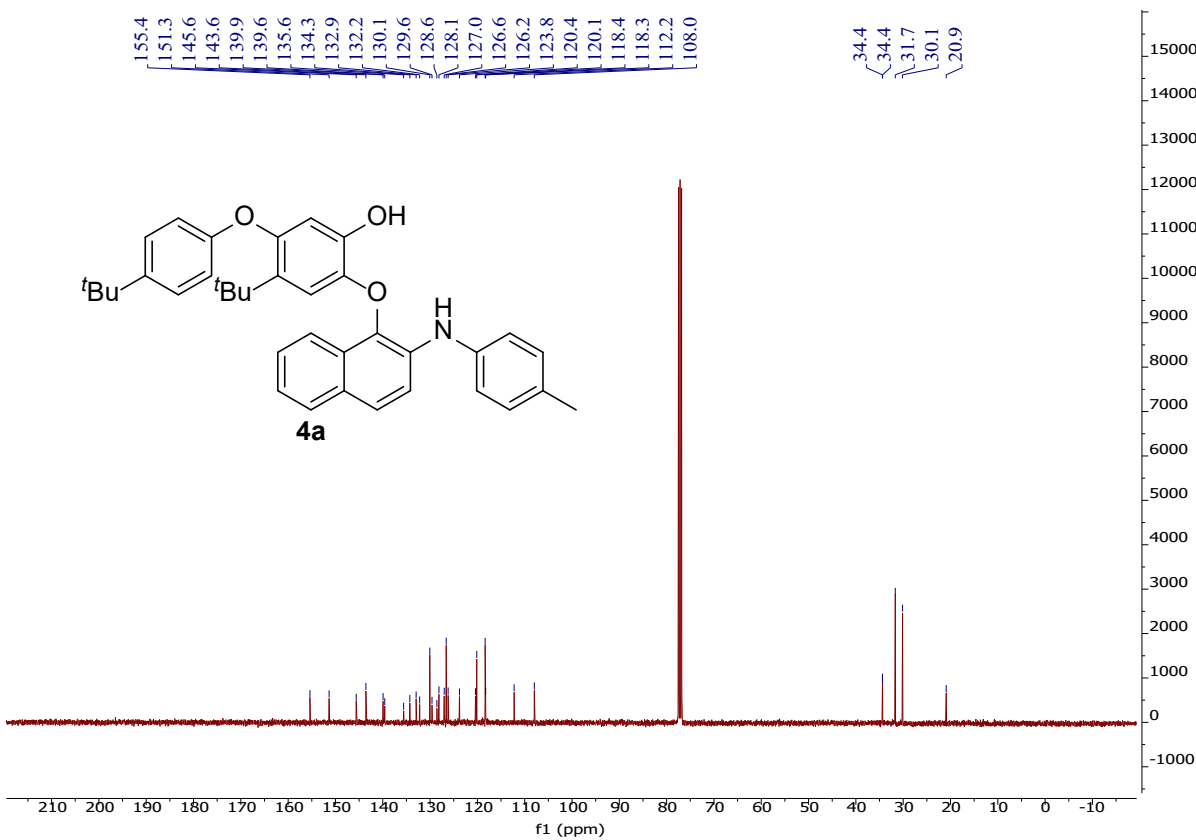

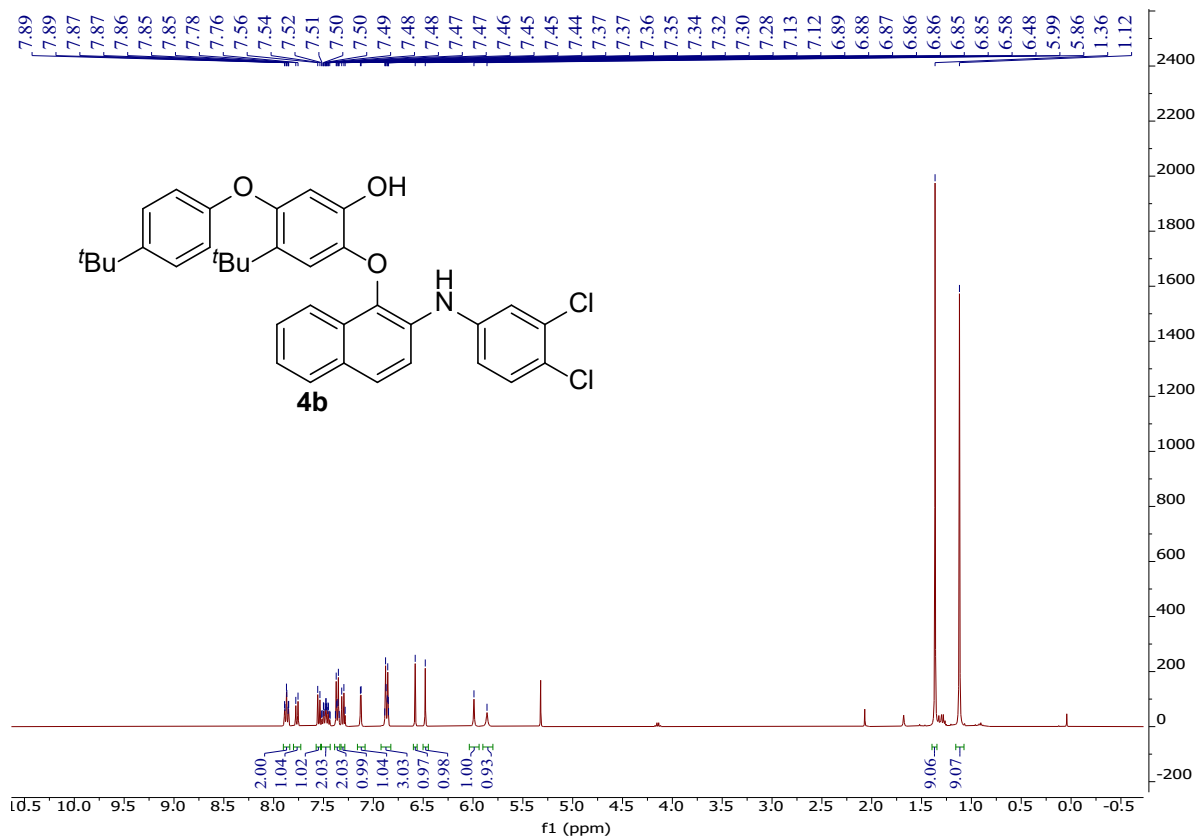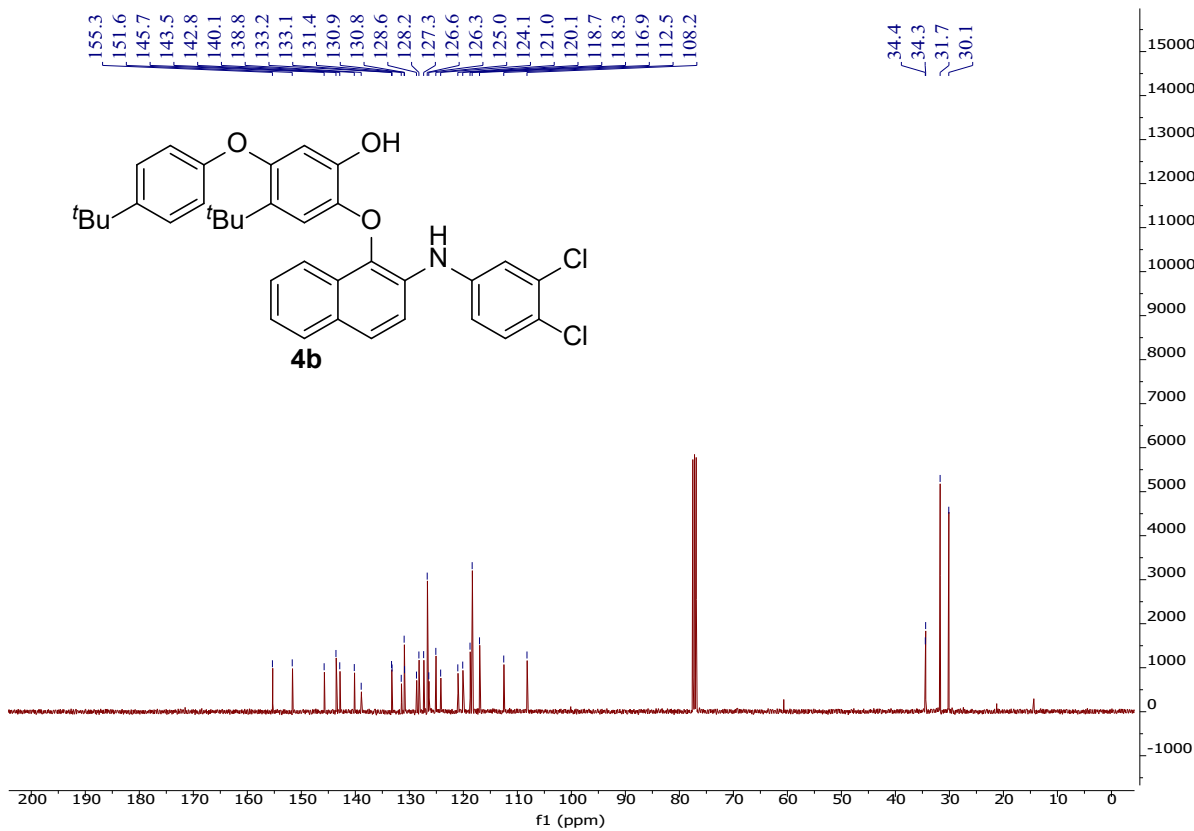

Supplement: d1qo01942b1.pdf [file d1qo01942b1.pdf]
